# Supplementary material for: Benchmark datasets for SARS-CoV-2 surveillance bioinformatics
Source: PubMed Central journal article supplement (PMC9454940; doi:10.7717/peerj.13821), 2022-09-05
Supplement: peerj-10-13821-s003.pdf [file peerj-10-13821-s003.pdf]

We gratefully acknowledge the following Authors from the Originating laboratories responsible for obtaining the specimens, as well as the Submitting laboratories where the genome data were generated and shared via GISAID, on which this research is based.

All Submitters of data may be contacted directly via [www.gisaid.org](http://www.gisaid.org)

Authors are sorted alphabetically.

| Accession ID                                                                                                                                                                                                   | Originating Laboratory                                                                   | Submitting Laboratory                                                                                                              | Authors                                                                                                                                                                                                                                                                                                                                                                                                                                                                                                  |
|----------------------------------------------------------------------------------------------------------------------------------------------------------------------------------------------------------------|------------------------------------------------------------------------------------------|------------------------------------------------------------------------------------------------------------------------------------|----------------------------------------------------------------------------------------------------------------------------------------------------------------------------------------------------------------------------------------------------------------------------------------------------------------------------------------------------------------------------------------------------------------------------------------------------------------------------------------------------------|
| EPI_ISL_765602                                                                                                                                                                                                 | Brigham and Womens Hospital                                                              | Infectious Disease Program, Broad Institute of Harvard and MIT                                                                     | A.E.; Adams, G.; Anahtar, M.; B.L.; B.W.; Bauer, M.; Birren; Branda, J.; Carter, A.; Cerrato, F.; Chaluvadi, S.; Chapman; Cusick, C.; D.J.; DeRuff, K.; E. and Sabeti; Flowers, K.; Gallagher, G.; Gladden-Young, A.; Gnrirke, A.; Harris, J.; J.E.; K.J.; LaRocque, R.; Lagerborg, K.; Lemieux; Lin; Loreth, C.; MacInnis; Neumann, A.; Normandin, E.; P.C.; Park; Pierce, V.; Reilly, S.; Rosenberg; Rudy, M.; Ryan, E.; S.B.; Shaw, B.; Siddle; Slater, D.; Smole, S.; Tomkins-Tinch, C.; Turbett, S. |
| EPI_ISL_847569                                                                                                                                                                                                 | California Department of Public Health                                                   | Chiu Laboratory, University of California, San Francisco                                                                           | Brian Bushnell; Candace Wang; Charles Chiu; Debra Wadford; Jill Hacker; Scot Federman; Xianding (Wayne) Deng                                                                                                                                                                                                                                                                                                                                                                                             |
| EPI_ISL_847621                                                                                                                                                                                                 | Chiu Laboratory, University of California, San Francisco                                 | Chiu Laboratory, University of California, San Francisco                                                                           | Brian Bushnell; Candace Wang; Charles Chiu; Debra Wadford; Jill Hacker; Scot Federman; Xianding (Wayne) Deng                                                                                                                                                                                                                                                                                                                                                                                             |
| EPI_ISL_710186, EPI_ISL_954883                                                                                                                                                                                 | Colorado Department of Public Health and Environment                                     | Colorado Department of Puplic Health and Environment                                                                               | Diana Ir; Emily A. Travanty; Laura Bankers; Molly C. Hetherington-Rauth; Sarah Elizabeth Totten; Shannon Ely; Shannon R. Matzinger                                                                                                                                                                                                                                                                                                                                                                       |
| EPI_ISL_548321, EPI_ISL_582920                                                                                                                                                                                 | County of Santa Clara Public Health Department                                           | Chan-Zuckerberg Biohub                                                                                                             | CZB Cliahub Consortium                                                                                                                                                                                                                                                                                                                                                                                                                                                                                   |
| EPI_ISL_804824                                                                                                                                                                                                 | DB Diagnosticos do Brasil                                                                | Laboratório de Parasitologia Médica - Instituto de Medicina Tropical - Universidade de São Paulo                                   | Andrew Rambaut; CADDE Genomic Network.; CDL; Camila A. Maia da Silva; Cecília da Cunha Camilo; DB; Darlan Candido; Erika Regina Manuli; Ester C. Sabino; Flavia Cristina Sales; HEMOAM; Ingra Morales Claro; Lucas A. Moyses Franco; Maria do Perpétuo Socorro Sampaio Carvalho; Myuki Alfaia Esashika Crispim; Nelson Abraham Fraiji; Nelson Gaburo; Nick Loman; Nuno Faria; Oliver G. Pybus; Pamela dos Santos Andrade; Renato A. Santana; Thais de Moura Coletti                                      |
| EPI_ISL_745110                                                                                                                                                                                                 | Elsies River CHC wc ERP                                                                  | National Health Laboratory Service (NHLS), Tygerberg                                                                               | Bronwyn Kleinhans; Eduan Wilkindon; Gert van Zyl; Houriyah Tegally; Kayla Delaney; Susan Engelbrecht; Tulio de Oliveira; Wolfgang Preiser                                                                                                                                                                                                                                                                                                                                                                |
| EPI_ISL_954180                                                                                                                                                                                                 | Hospital Universitari Vall d'Hebron - Vall d'Hebron Institut de Recerca                  | Hospital Universitari Vall d'Hebron - Vall d'Hebron Institut de Recerca                                                            | Andrés Antón; Ariadna Rando; Carla Castillo; Cristina Andrés; Damir Garcia-Cehic; Josep F Abril; Josep Quer; Juliana Esperalba; Maria Carmen Martin; Maria Gema Codina; Maria Piñana; Tomàs Pumarola                                                                                                                                                                                                                                                                                                     |
| EPI_ISL_955696                                                                                                                                                                                                 | Humboldt County Public Health Laboratory                                                 | Chan-Zuckerberg Biohub                                                                                                             | CZB Cliahub Consortium                                                                                                                                                                                                                                                                                                                                                                                                                                                                                   |
| EPI_ISL_717936                                                                                                                                                                                                 | Laboratorio de Virologia Molecular / UFRJ                                                | Bioinformatics Laboratory / LNCC                                                                                                   | Alexandra L Gerber; Amilcar Tanuri; Ana Paula de C Guimarães; Ana Tereza R de Vasconcelos; Andréa Cony Cavalcanti; Carolina M Voloch; Claudia dos Santos Rodrigues; Cynthia C Cardoso; Diana Mariani; Luiz G P de Almeida; Otavio Bustroli; Ronaldo da Silva Jr; Terezinha M P P Castiñeira                                                                                                                                                                                                              |
| EPI_ISL_1718630                                                                                                                                                                                                | Lighthouse Lab in Alderley Park                                                          | Wellcome Sanger Institute for the COVID-19 Genomics UK (COG-UK) Consortium                                                         | Cordelia Langford; David K. Jackson; Dominic Kwiatkowski; Ewan Harrison; Ian Johnston; Jacquelyn Wynn; Jeffrey Barrett; John Sillitoe on behalf of the Wellcome Sanger Institute COVID-19 Surveillance Team; Mairead Hyland; Roberto Amato; Sonia Goncalves; The Lighthouse Lab in Alderley Park and Alex Alderton                                                                                                                                                                                       |
| EPI_ISL_1365182, EPI_ISL_1615877, EPI_ISL_1631305, EPI_ISL_1719127                                                                                                                                             | Lighthouse Lab in Cambridge                                                              | Wellcome Sanger Institute for the COVID-19 Genomics UK (COG-UK) Consortium                                                         | Cordelia Langford; David K. Jackson; Dominic Kwiatkowski; Ewan Harrison; Ian Johnston; Jeffrey Barrett; John Sillitoe on behalf of the Wellcome Sanger Institute COVID-19 Surveillance Team; Rob Howes; Roberto Amato; Sonia Goncalves; The Lighthouse Lab in Alderley Park and Alex Alderton                                                                                                                                                                                                            |
| EPI_ISL_836839, EPI_ISL_836881, EPI_ISL_1519095                                                                                                                                                                | Lighthouse Lab in Glasgow                                                                | Wellcome Sanger Institute for the COVID-19 Genomics UK (COG-UK) Consortium                                                         | Anna Dominiczak and Alex Alderton; Carol Clugston; Cordelia Langford; David Gray; David K. Jackson; Dominic Kwiatkowski; Ewan Harrison; Harper VanSteenhouse; Ian Johnston; Jeffrey Barrett; John Sillitoe on behalf of the Wellcome Sanger Institute COVID-19 Surveillance Team; Roberto Amato; Sonia Goncalves; Yumi Kasai                                                                                                                                                                             |
| EPI_ISL_672414                                                                                                                                                                                                 | Madera County Department of Public Health                                                | Chan-Zuckerberg Biohub                                                                                                             | CZB Cliahub Consortium                                                                                                                                                                                                                                                                                                                                                                                                                                                                                   |
| EPI_ISL_765725, EPI_ISL_791905                                                                                                                                                                                 | Massachusetts General Hospital                                                           | Infectious Disease Program, Broad Institute of Harvard and MIT                                                                     | A.E.; Adams, G.; Anahtar, M.; B.L.; B.W.; Bauer, M.; Birren; Branda, J.; Carter, A.; Cerrato, F.; Chaluvadi, S.; Chapman; Cusick, C.; D.J.; DeRuff, K.; E. and Sabeti; Flowers, K.; Gallagher, G.; Gladden-Young, A.; Gnrirke, A.; Harris, J.; J.E.; K.J.; LaRocque, R.; Lagerborg, K.; Lemieux; Lin; Loreth, C.; MacInnis; Neumann, A.; Normandin, E.; P.C.; Park; Pierce, V.; Reilly, S.; Rosenberg; Rudy, M.; Ryan, E.; S.B.; Shaw, B.; Siddle; Slater, D.; Smole, S.; Tomkins-Tinch, C.; Turbett, S. |
| EPI_ISL_562310, EPI_ISL_640743                                                                                                                                                                                 | Microbiological Diagnostic Unit - Public Health Laboratory (MDU-PHL)                     | MDU-PHL                                                                                                                            | M.L.; N.L.; Sait; Sait, M.; Schultz M. B.; Schultz M.B.; Seemann T.; Seemann, T.; Sherry; Sherry, N.                                                                                                                                                                                                                                                                                                                                                                                                     |
| EPI_ISL_2088240                                                                                                                                                                                                | National Virus Reference Laboratory                                                      | National Virus Reference Laboratory                                                                                                | Charlene Bennett; Cililian F De Gascun; Gabriel Gonzalez; Jonathan Dean; Michael Carr; Zoe Yandle                                                                                                                                                                                                                                                                                                                                                                                                        |
| EPI_ISL_513739                                                                                                                                                                                                 | Orange County Public Health Lab                                                          | Chan-Zuckerberg Biohub                                                                                                             | CZB Cliahub Consortium                                                                                                                                                                                                                                                                                                                                                                                                                                                                                   |
| EPI_ISL_1052966                                                                                                                                                                                                | Originating lab: Wales Specialist Virology Centre Sequencing Lab; Pathogen Genomics Unit | Public Health Wales Microbiology Cardiff Wales Specialist Virology Centre                                                          | Alec Birchley; Alexander Adams; Amy Gaskin; Angela Marchbank; Bree Gatica-Wilcox; Catherine Moore; Jason Coombes; Joanne Watkins; Joel Southgate; Johnathan Evans; Laura Gifford; Lauren Gilbert; Lee Graham; Malorie Perry; Matthew Bull; Nicole Pacchiarini; Sally Corden; Sara Kumziene-Summerhayes; Sara Rey; Sarah Taylor; Simon Cottrell; Sophie Jones; Tom Connor                                                                                                                                 |
| EPI_ISL_468562, EPI_ISL_571262, EPI_ISL_571474, EPI_ISL_571780, EPI_ISL_572109, EPI_ISL_604296, EPI_ISL_605023, EPI_ISL_605053, EPI_ISL_802998, EPI_ISL_803016, EPI_ISL_854906, EPI_ISL_855171, EPI_ISL_903554 | see above                                                                                | Quest Diagnostics                                                                                                                  | Anderson; Anderson, B.; B.P.; Bernstein; D.F.; Gerasimova, A.; Grover, D.; Hua, M.; I.A.; K.E.; Kagan; L.E.; Lacbawan, F.; Liu Y.; Livingston; Owen, R.; Perez, A.; R.M.; R.M. and Owen, R.; Rosenthal; S.H.; Shalhout; Shlyakhter; Tanpaiboon, P.                                                                                                                                                                                                                                                       |
| EPI_ISL_1631836                                                                                                                                                                                                | Randox Laboratories                                                                      | Wellcome Sanger Institute for the COVID-19 Genomics UK (COG-UK) Consortium                                                         | Cordelia Langford; David K. Jackson; Dominic Kwiatkowski; Ewan Harrison; Ian Johnston; Jeffrey Barrett; John Sillitoe on behalf of the Wellcome Sanger Institute COVID-19 Surveillance Team; Randox Laboratories and Alex Alderton; Roberto Amato; Sonia Goncalves                                                                                                                                                                                                                                       |
| EPI_ISL_1214361                                                                                                                                                                                                | SARS-CoV-2 Sequencing Castilla y Leon-Spain Consortium                                   | SARS-CoV-2 Sequencing Castilla y Leon-Spain Consortium                                                                             | Antonio Orduña-Domingo; Carlos Fuster Foz; Carmen Aldea-Mansilla; Carmen Gimeno Crespo; David Abad; Gregoria Megías Lobón; Jose Maria Eiros Bouza; Laura Sánchez de Prada; M. Isabel Fernandez-Natal; Marta Dominguez-Gil; Marta Hernandez; María Antonia García Castro; Mª Fe Brezmes-Valdivieso; Noelia Arenal Andrés; Silvia Rojo; Sonsoles Garcinuño Pérez                                                                                                                                           |
| EPI_ISL_583189                                                                                                                                                                                                 | San Bernardino County Public Health Lab                                                  | Chan-Zuckerberg Biohub                                                                                                             | CZB Cliahub Consortium                                                                                                                                                                                                                                                                                                                                                                                                                                                                                   |
| EPI_ISL_738705, EPI_ISL_739321, EPI_ISL_955570, EPI_ISL_979028                                                                                                                                                 | Santa Clara County Public Health Laboratory                                              | Chan-Zuckerberg Biohub                                                                                                             | CZB Cliahub Consortium                                                                                                                                                                                                                                                                                                                                                                                                                                                                                   |
| EPI_ISL_569689, EPI_ISL_654763, EPI_ISL_766766, EPI_ISL_978333                                                                                                                                                 | Texas Department of State Health Services                                                | Texas Department of State Health Services                                                                                          | Anita Pokharel; Bonnie Oh; Chun Wang; Chung Wang; Grace Kubin; James Daniel Bonser; Jenny Zhang; Maliha Rahman; Mayela Pedruzea; Myong Koag; Rachel Lee; Rashmi Tuladhar                                                                                                                                                                                                                                                                                                                                 |
| EPI_ISL_911639                                                                                                                                                                                                 | Texas Department of State Health Services (TXDSHS)                                       | Texas Department of State Health Services (TXDSHS)                                                                                 | Anita Pokharel; Bonnie Oh; Chung Wang; Grace Kubin; James Daniel Bonser; Jenny Zhang; Maliha Rahman; Mayela Pedruzea; Myong Koag; Rachel Lee; Rashmi Tuladhar                                                                                                                                                                                                                                                                                                                                            |
| EPI_ISL_672188, EPI_ISL_672271                                                                                                                                                                                 | The Ashley Laboratory, Stanford University                                               | Chan-Zuckerberg Biohub                                                                                                             | CZB Cliahub Consortium                                                                                                                                                                                                                                                                                                                                                                                                                                                                                   |
| EPI_ISL_1625962                                                                                                                                                                                                | UTGSAF                                                                                   | UTGSAF                                                                                                                             | Andreas Matouschek; Anna Battenhouse; Audrey Kelly; Jessica Podnar; Sylvie Beaudenon; Zachary Carver                                                                                                                                                                                                                                                                                                                                                                                                     |
| EPI_ISL_487221, EPI_ISL_594107, EPI_ISL_812372                                                                                                                                                                 | Utah Public Health Laboratory                                                            | Utah Public Health Laboratory                                                                                                      | Erin L. Young; Erin Young; Heidi Butz; Kelly F. Oakeson; Kelly Oakeson; Tara Gallagher                                                                                                                                                                                                                                                                                                                                                                                                                   |
| EPI_ISL_426665                                                                                                                                                                                                 | Victorian Infectious Diseases Reference Laboratory (VIDRL)                               | Microbiological Diagnostic Unit Public Health Laboratory and Victorian Infectious Diseases Reference Laboratory, Doherty Institute | Caly L.; Druce J.; Sait, M.; Schultz M.; Seemann T.; Sherry, N.                                                                                                                                                                                                                                                                                                                                                                                                                                          |
| EPI_ISL_480662, EPI_ISL_521499                                                                                                                                                                                 | Victorian Infectious Diseases Reference Laboratory (VIDRL)                               | VIDRL and MDU-PHL                                                                                                                  | Caly L.; Druce J.; Sait, M.; Schultz M.; Seemann T.; Sherry, N.                                                                                                                                                                                                                                                                                                                                                                                                                                          |
| EPI_ISL_419780                                                                                                                                                                                                 | Victorian Infectious Diseases Reference Laboratory (VIDRL)                               | Victorian Infectious Diseases Reference Laboratory and Microbiological Diagnostic Unit Public Health Laboratory, Doherty Institute | Caly L.; Druce J.; Sait, M.; Schultz M.; Seemann T.; Sherry, N.                                                                                                                                                                                                                                                                                                                                                                                                                                          |
| EPI_ISL_794226                                                                                                                                                                                                 | WESTCHESTER MEDICAL CENTER                                                               | Wadsworth Center, New York State Department of Health                                                                              | Alexis Russel; Daryl M. Lamson; Erasmus Schneider; Erica Lasek-Nesselquist; John Kelly; Jonathan Pitnick; Kirsten St. George; Matthew Shudt; Melissa A Leisner; Navjot Singh; Sara Griesemer                                                                                                                                                                                                                                                                                                             |
