# Supplementary material for: Benchmark datasets for SARS-CoV-2 surveillance bioinformatics
Source: PeerJ. 2022 Sep 5;10:e13821. doi: 10.7717/peerj.13821 (PMC9454940; doi:10.7717/peerj.13821)
Supplement: Table S2 — FastQC, Samtools and TheiaCoV have been used to evaluate key QC metrics listed in Table 2 including quality of raw reads, depth, breath of coverage, quality of resulted assemblies. [file peerj-10-13821-s002.xlsx]

## Sheet: Dataset1 (n=63)
			FASTQC			Samtools depth				Titan
Dataset	ID	SRA	Total Reads	Read length	Mean phred score	Mean Depth per nucleotide (MDN)	Standard deviation (for MDN)	Coefficient of variation (for MDN)	Number of nucleotides with depth <10	Number of paired end reads	Assembly Total length	Ambigous Ns	Assembly mean coverage	% mapped to the Wuhan reference	nextclade_aa_dels	nextclade_aa_subs	nextclade_clade	nextclade_version	pango_lineage	pangolin_version
1	MA_MGH_00229	SRR11953924	1629129	101	34.3623	424.686	203.61	0.479437	10	1629129	29898	38	297.82	99.86		N:Q229H|ORF1a:T265I|ORF1b:T237I|ORF1b:P314L|ORF3a:Q57H|S:D614G	20C	0.14.4	B.1	pangolin 3.1.3; PANGO-v1.2.13
1	MA_MGH_00230	SRR11953711	1242457	101	34.7879	1323	521.673	0.394312	10	1242457	29903	40	937.007	99.87		ORF1a:T265I|ORF1a:E1209D|ORF1b:P314L|ORF3a:Q57H|S:D614G	20C	0.14.4	B.1.268	pangolin 3.1.3; PANGO-v1.2.13
1	MA_MGH_00231	SRR11954075	1837852	101	34.4591	671.339	332.428	0.495171	10	1837852	29900	65	470.411	99.77		ORF1a:T265I|ORF1a:E1209D|ORF1b:P314L|ORF3a:Q57H|S:D614G	20C	0.14.4	B.1.268	pangolin 3.1.3; PANGO-v1.2.13
1	MA_MGH_00233	SRR11953754	1226089	101	34.8446	1475.92	698.292	0.473122	8	1226089	29898	35	1059.01	99.87		ORF1a:T265I|ORF1a:E1209D|ORF1b:P314L|ORF3a:Q57H|S:D614G	20C	0.14.4	B.1.268	pangolin 3.1.3; PANGO-v1.2.13
1	MA_MGH_00234	SRR11954109	565426	101	34.2853	239.802	110.792	0.462016	12	565426	29897	82	144.683	99.71		ORF1a:T265I|ORF1a:E1209D|ORF1b:P314L|ORF3a:Q57H|S:D614G	20C	0.14.4	B.1.268	pangolin 3.1.3; PANGO-v1.2.13
1	MA_MGH_00238	SRR11954088	679555	101	35.0396	1089.34	575.344	0.52816	9	679555	29899	69	736.761	99.76		N:Q229H|ORF1a:T265I|ORF1b:P314L|ORF3a:Q57H|S:D614G	20C	0.14.4	B.1	pangolin 3.1.3; PANGO-v1.2.13
1	MA_MGH_00239	SRR11953740	478262	101	35.221	720.294	360.136	0.499985	10	478262	29899	69	483.161	99.76		ORF1a:T265I|ORF1a:E1209D|ORF1b:P314L|ORF3a:Q57H|S:D614G	20C	0.14.4	B.1.268	pangolin 3.1.3; PANGO-v1.2.13
1	MA_MGH_00242	SRR11954202	795919	101	35.7865	3164.87	1591.12	0.502744	6	795919	29875	33	2241.78	99.8		ORF1a:T265I|ORF1a:E1209D|ORF1b:P314L|ORF3a:Q57H|S:D614G	20C	0.14.4	B.1.268	pangolin 3.1.3; PANGO-v1.2.13
1	MA_MGH_00243	SRR11953808	371667	101	34.4325	541.211	336.387	0.621545	12	371667	29848	18	287.405	99.76		ORF1a:T265I|ORF1a:E1209D|ORF1b:P314L|ORF3a:Q57H|S:D614G	20C	0.14.4	B.1.268	pangolin 3.1.3; PANGO-v1.2.13
1	MA_MGH_00244	SRR11953975	787267	101	35.5827	3215.89	1493.55	0.464427	5	787267	29872	15	2210.13	99.85		ORF1a:T265I|ORF1a:E1209D|ORF1b:P314L|ORF3a:Q57H|S:D614G	20C	0.14.4	B.1.268	pangolin 3.1.3; PANGO-v1.2.13
1	MA_MGH_00245	SRR11954031	1482468	101	34.9663	2049.45	925.313	0.451492	9	1482468	29901	70	1382.04	99.76		ORF1a:T265I|ORF1a:E1209D|ORF1b:P314L|ORF3a:Q57H|S:D614G	20C	0.14.4	B.1.268	pangolin 3.1.3; PANGO-v1.2.13
1	MA_MGH_00247	SRR11954235	779688	101	35.351	2255.31	1010.41	0.448012	6	779688	29903	73	1559.28	99.76		ORF1a:T265I|ORF1a:E1209D|ORF1b:P314L|ORF3a:Q57H|S:D614G	20C	0.14.4	B.1.268	pangolin 3.1.3; PANGO-v1.2.13
1	MA_MGH_00248	SRR11953726	682756	101	34.3576	104.728	45.8316	0.437624	26	682756	29898	158	63.5705	99.45		ORF1a:T265I|ORF1a:E1209D|ORF1b:P314L|ORF3a:Q57H|S:F32L|S:D614G	20C	0.14.4	B.1.268	pangolin 3.1.3; PUSHER-v1.2.13
1	MA_MGH_00250	SRR11954102	1461510	101	34.601	384.523	193.899	0.504259	23	1461510	29898	35	274.909	99.87		N:Q229H|ORF1a:T265I|ORF1b:P314L|ORF3a:Q57H|S:D614G	20C	0.14.4	B.1	pangolin 3.1.3; PANGO-v1.2.13
1	MA_MGH_00251	SRR11953946	740123	101	33.3538	621.526	240.262	0.386568	10	740123	29898	68	179.568	99.76		ORF1a:T265I|ORF1a:E1209D|ORF1b:P314L|ORF3a:Q57H|S:D614G	20C	0.14.4	B.1.268	pangolin 3.1.3; PANGO-v1.2.13
1	MA_MGH_00252	SRR11954192	1719438	101	34.7589	4549.8	1680.47	0.369349	4	1719438	29903	38	2933.8	99.87		ORF1a:T265I|ORF1a:E1209D|ORF1b:P314L|ORF3a:Q57H|S:D614G	20C	0.14.4	B.1.268	pangolin 3.1.3; PANGO-v1.2.13
1	MA_MGH_00254	SRR11953789	111731	101	34.5105	77.7628	33.2106	0.427076	39	111731	29830	493	33.3197	98.11		ORF1a:T265I|ORF1a:E1209D|ORF1b:P314L|ORF3a:Q57H|S:D614G	20C	0.14.4	B.1.268	pangolin 3.1.3; PUSHER-v1.2.13
1	MA_MGH_00256	SRR11954100	767771	101	35.2675	282.11	138.814	0.492057	23	767771	29897	67	199.839	99.76		ORF1a:T265I|ORF1a:E1209D|ORF1b:P314L|ORF3a:Q57H|S:D614G	20C	0.14.4	B.1.268	pangolin 3.1.3; PANGO-v1.2.13
1	MA_MGH_00257	SRR11954086	548372	101	35.2798	465.616	290.129	0.623107	12	548372	29901	71	343.11	99.76		ORF1b:P314L|S:D614G	20A	0.14.4	B.1	pangolin 3.1.3; PANGO-v1.2.13
1	MA_MGH_00258	SRR11954187	364028	101	34.9944	56.8456	44.0825	0.775478	158	364028	29897	876	39.3084	97.05		ORF1a:T265I|ORF1a:E1209D|ORF1b:P314L|ORF3a:Q57H	20C	0.14.4	B.1.268	pangolin 3.1.3; PUSHER-v1.2.13
1	MA_MGH_00261	SRR11954161	155339	101	35.6057	215.769	85.2481	0.39509	32	155339	29871	41	149.707	99.76		ORF1a:T265I|ORF1a:E1209D|ORF1b:P314L|ORF3a:Q57H|S:D614G	20C	0.14.4	B.1.268	pangolin 3.1.3; PANGO-v1.2.13
1	MA_MGH_00262	SRR11953927	1200655	101	33.4668	340.366	143.284	0.42097	12	1200655	29898	74	164.152	99.74		ORF1b:P314L|S:D614G	20A	0.14.4	B.1	pangolin 3.1.3; PANGO-v1.2.13
1	MA_MGH_00263	SRR11953777	166399	101	34.7539	54.8786	23.3797	0.426025	103	166399	29897	723	31.3832	97.56		ORF1a:T265I|ORF1a:E1209D|ORF1a:T4031I|ORF1b:P314L|ORF3a:Q57H|S:D614G	20C	0.14.4	B.1.268	pangolin 3.1.3; PUSHER-v1.2.13
1	MA_MGH_00264	SRR11954025	809273	101	35.4711	1606.28	859.697	0.535209	11	809273	29870	40	1131.6	99.75		ORF1a:T265I|ORF1a:E1209D|ORF1b:P314L|ORF3a:Q57H|S:D614G	20C	0.14.4	B.1.268	pangolin 3.1.3; PUSHER-v1.2.13
1	MA_MGH_00265	SRR11953998	200639	101	34.8849	109.748	61.6681	0.561909	40	200639	29831	59	66.8889	99.56		ORF1a:T265I|ORF1a:E1209D|ORF1a:A2554V|ORF1b:P314L|ORF3a:Q57H|S:L5F|S:D614G	20C	0.14.4	B.1.268	pangolin 3.1.3; PUSHER-v1.2.13
1	MA_MGH_00266	SRR11954141	998651	101	34.9407	1149.29	559.986	0.487246	10	998651	29898	68	773.778	99.76		ORF1a:T265I|ORF1a:E1209D|ORF1b:P314L|ORF3a:Q57H|S:D614G	20C	0.14.4	B.1.268	pangolin 3.1.3; PANGO-v1.2.13
1	MA_MGH_00267	SRR11953746	238839	101	35.499	749.796	344.317	0.459214	14	238839	29900	70	508.468	99.76		ORF1a:T265I|ORF1a:E1209D|ORF1b:P314L|ORF3a:Q57H|S:D614G	20C	0.14.4	B.1.268	pangolin 3.1.3; PANGO-v1.2.13
1	MA_MGH_00269	SRR11954176	771922	101	35.3621	588.701	365.647	0.621108	12	771922	29870	40	428.906	99.76		ORF1a:T265I|ORF1a:E1209D|ORF1b:P314L|ORF3a:Q57H|S:D614G	20C	0.14.4	B.1.268	pangolin 3.1.3; PANGO-v1.2.13
1	MA_MGH_00270	SRR11953688	36561	101	35.6547	92.0469	46.1346	0.501207	25	36561	29897	145	65.4252	99.5		ORF1a:T265I|ORF1a:E1209D|ORF1b:P314L|ORF3a:Q57H|S:D614G	20C	0.14.4	B.1.268	pangolin 3.1.3; PUSHER-v1.2.13
1	MA_MGH_00271	SRR11953764	512070	101	35.4759	1338.63	699.962	0.522895	8	512070	29870	40	947.78	99.75		ORF1a:T265I|ORF1a:E1209D|ORF1b:P314L|ORF3a:Q57H|S:D614G	20C	0.14.4	B.1.268	pangolin 3.1.3; PUSHER-v1.2.13
1	MA_MGH_00272	SRR11953866	685089	101	34.9381	313.341	156.877	0.500659	13	685089	29897	89	214.579	99.68		ORF1a:T265I|ORF1a:E1209D|ORF1b:P314L|ORF3a:Q57H|S:D614G	20C	0.14.4	B.1.268	pangolin 3.1.3; PUSHER-v1.2.13
1	MA_MGH_00273	SRR11953691	835539	101	34.9996	149.703	68.806	0.459618	23	835539	29897	54	105.982	99.8		ORF1a:T265I|ORF1a:E1209D|ORF1b:P314L|ORF3a:Q57H|S:D614G	20C	0.14.4	B.1.268	pangolin 3.1.3; PANGO-v1.2.13
1	MA_MGH_00274	SRR11954299	523810	101	35.205	999.943	434.85	0.434875	11	523810	29868	38	674.175	99.76		ORF1a:T265I|ORF1a:E1209D|ORF1b:P314L|ORF3a:Q57H|S:D614G	20C	0.14.4	B.1.268	pangolin 3.1.3; PANGO-v1.2.13
1	MA_MGH_00276	SRR11953980	1126526	101	34.7604	1339.19	537.225	0.401157	10	1126526	29899	69	911.191	99.76		ORF1a:T265I|ORF1a:E1209D|ORF1b:P314L|ORF3a:Q57H|S:D614G	20C	0.14.4	B.1.268	pangolin 3.1.3; PANGO-v1.2.13
1	MA_MGH_00277	SRR11953755	297904	101	35.1911	331.755	165.87	0.499977	13	297904	29868	38	226.51	99.76		ORF1a:T265I|ORF1a:E1209D|ORF1b:P314L|ORF3a:Q57H|S:D614G	20C	0.14.4	B.1.268	pangolin 3.1.3; PANGO-v1.2.13
1	MA_MGH_00278	SRR11954201	1014756	101	35.0071	5068.47	1870.74	0.369094	5	1014756	29870	40	3205.65	99.76		ORF1a:T265I|ORF1a:E1209D|ORF1b:P314L|ORF3a:Q57H|S:D614G	20C	0.14.4	B.1.268	pangolin 3.1.3; PANGO-v1.2.13
1	MA_MGH_00280	SRR11953760	1077540	101	35.3769	2409.13	1017.85	0.422497	6	1077540	29898	35	1581.86	99.87		ORF1a:T265I|ORF1a:E1209D|ORF1b:P314L|ORF3a:Q57H|S:D614G	20C	0.14.4	B.1.268	pangolin 3.1.3; PANGO-v1.2.13
1	MA_MGH_00281	SRR11954301	1088712	101	35.5808	4984.11	1643.57	0.329761	4	1088712	29876	12	3518.3	99.87		ORF1a:T265I|ORF1a:E1209D|ORF1b:P314L|ORF3a:Q57H|S:D614G	20C	0.14.4	B.1.268	pangolin 3.1.3; PANGO-v1.2.13
1	MA_MGH_00282	SRR11953844	854605	101	34.7537	30.0826	17.6491	0.58669	1274	854605	29897	3765	21.4025	87.39		ORF1a:T265I|ORF1a:E1209D|ORF1b:P314L|ORF3a:Q57H|S:D614G	20C	0.14.4	B.1.268	pangolin 3.1.3; PUSHER-v1.2.13
1	MA_MGH_00283	SRR11954002	331112	101	35.0855	104.287	54.7602	0.525091	39	331112	29895	73	72.635	99.73		ORF1a:T265I|ORF1a:E1209D|ORF1b:P314L|ORF3a:Q57H|S:D614G	20C	0.14.4	B.1.268	pangolin 3.1.3; PUSHER-v1.2.13
1	MA_MGH_00285	SRR11953965	1019328	101	35.1656	1596.04	651.716	0.408332	9	1019328	29903	73	1086.28	99.76		ORF1a:T265I|ORF1a:E1209D|ORF1b:P314L|ORF3a:Q57H|S:D614G	20C	0.14.4	B.1.268	pangolin 3.1.3; PANGO-v1.2.13
1	MA_MGH_00287	SRR11954198	526955	101	35.5862	2447.86	1151.73	0.470504	12	526955	29871	41	1757.7	99.76		ORF1a:T265I|ORF1a:E1209D|ORF1b:P314L|ORF3a:Q57H|S:D614G	20C	0.14.4	B.1.268	pangolin 3.1.3; PANGO-v1.2.13
1	MA_MGH_00288	SRR11953846	845450	101	34.9777	1163.59	420.222	0.361142	10	845450	29898	68	788.128	99.76		ORF1a:T265I|ORF1a:E1209D|ORF1b:P314L|ORF3a:Q57H|S:D614G	20C	0.14.4	B.1.268	pangolin 3.1.3; PANGO-v1.2.13
1	MA_MGH_00289	SRR11953966	733788	101	34.5178	60.013	38.5968	0.643141	724	733788	29897	1943	42.2143	93.48		ORF1a:T265I|ORF1a:E1209D|ORF1a:P2079S|ORF1a:A2554V|ORF1b:P314L|ORF3a:Q57H|ORF3a:L94F|S:D614G	20C	0.14.4	B.1.268	pangolin 3.1.3; PUSHER-v1.2.13
1	MA_MGH_00290	SRR11953983	356923	101	35.2275	53.6996	28.0251	0.521886	164	356923	29830	773	37.1027	97.17		ORF1a:T265I|ORF1a:E1209D|ORF1b:P314L|ORF3a:Q57H|S:D614G	20C	0.14.4	B.1.268	pangolin 3.1.3; PUSHER-v1.2.13
1	MA_MGH_00291	SRR11954160	2044767	101	35.3463	6536.32	1673.57	0.256041	5	2044767	29877	12	5587.74	99.87		ORF1a:T265I|ORF1a:E1209D|ORF1b:P314L|ORF3a:Q57H|S:D614G	20C	0.14.4	B.1.268	pangolin 3.1.3; PANGO-v1.2.13
1	MA_MGH_00294	SRR11953723	991009	101	34.4622	4204.85	1781.85	0.423761	5	991009	29876	45	2203.49	99.76		ORF1a:T265I|ORF1a:E1209D|ORF1b:P314L|ORF3a:Q57H|S:D614G	20C	0.14.4	B.1.268	pangolin 3.1.3; PANGO-v1.2.13
1	MA_MGH_00295	SRR11954120	962981	101	35.0895	729.52	324.242	0.44446	10	962981	29898	68	528.4	99.76		ORF1a:T265I|ORF1a:E1209D|ORF1b:P314L|ORF3a:Q57H|S:L5F|S:D614G	20C	0.14.4	B.1.268	pangolin 3.1.3; PANGO-v1.2.13
1	MA_MGH_00296	SRR11953840	676195	101	34.3747	40.8493	22.1522	0.542291	449	676195	29899	2657	25.1889	91.1		ORF1a:T265I|ORF1a:A535T|ORF1a:E1209D|ORF1b:P314L|ORF3a:Q57H|S:D614G	20C	0.14.4	B.1.268	pangolin 3.1.3; PUSHER-v1.2.13
1	MA_MGH_00297	SRR11954050	1716737	101	34.419	219.478	118.169	0.538409	29	1716737	29897	81	160.016	99.71		ORF1a:T265I|ORF1a:E1209D|ORF1b:P314L|ORF3a:Q57H|S:D614G	20C	0.14.4	B.1.268	pangolin 3.1.3; PANGO-v1.2.13
1	MA_MGH_00298	SRR11954189	1188836	101	34.7617	659.812	290.975	0.440997	10	1188836	29899	38	472.326	99.86		ORF1b:P314L|S:D614G	20A	0.14.4	B.1	pangolin 3.1.3; PANGO-v1.2.13
1	MA_MGH_00299	SRR11954210	1293087	101	33.7226	825.374	576.231	0.698145	9	1293087	29897	67	373.874	99.76		ORF1a:T265I|ORF1a:E1209D|ORF1b:P314L|ORF3a:Q57H|S:D614G	20C	0.14.4	B.1.453	pangolin 3.1.3; PANGO-v1.2.13
1	MA_MGH_00302	SRR11953816	1412507	101	35.0222	5683.3	2026.71	0.356608	4	1412507	29902	63	3948.31	99.79		ORF1a:T265I|ORF1a:E1209D|ORF1b:P314L|ORF3a:Q57H|S:D614G	20C	0.14.4	B.1.268	pangolin 3.1.3; PANGO-v1.2.13
1	MA_MGH_00303	SRR11954234	697031	101	34.6507	1431.29	609.758	0.426019	10	697031	29836	6	759.915	99.76		ORF1a:T265I|ORF1a:E1209D|ORF1b:P314L|ORF3a:Q57H|S:D614G	20C	0.14.4	B.1.268	pangolin 3.1.3; PANGO-v1.2.13
1	MA_MGH_00304	SRR11953686	1125995	101	35.0904	2584.74	914.805	0.353926	10	1125995	29898	33	1691	99.87		ORF1a:T265I|ORF1a:E1209D|ORF1b:M101V|ORF1b:P314L|ORF3a:Q57H|S:D614G	20C	0.14.4	B.1.268	pangolin 3.1.3; PANGO-v1.2.13
1	MA_MGH_00305	SRR11954295	725329	101	33.9595	129.466	85.2699	0.658629	62	725329	29897	161	75.848	99.44		ORF1a:T265I|ORF1a:E1209D|ORF1b:P314L|ORF3a:Q57H|S:D614G	20C	0.14.4	B.1.268	pangolin 3.1.3; PUSHER-v1.2.13
1	MA_MGH_00318	SRR11953923	1194248	101	35.5863	5028.94	1844.1	0.366698	5	1194248	29903	39	3588.3	99.87		ORF1a:T265I|ORF1a:E1209D|ORF1b:P314L|ORF3a:Q57H|S:L5F|S:D614G	20C	0.14.4	B.1.268	pangolin 3.1.3; PANGO-v1.2.13
1	MA_MGH_00445	SRR11954028	1558393	101	35.3051	3470.93	1347.96	0.388357	6	1558393	29898	32	1731.02	99.88		ORF1a:T265I|ORF1a:E1209D|ORF1b:P314L|ORF1b:V2199F|ORF3a:Q57H|S:D614G	20C	0.14.4	B.1.268	pangolin 3.1.3; PANGO-v1.2.13
1	MA_MGH_00459	SRR11954083	1442994	101	34.8844	3135.63	1431.67	0.45658	6	1442994	29899	2	1781.26	99.98		ORF1a:T265I|ORF1a:E1209D|ORF1b:P314L|ORF3a:Q57H|S:D614G	20C	0.14.4	B.1.268	pangolin 3.1.3; PANGO-v1.2.13
1	MA_MGH_00467	SRR11954251	429151	101	35.1614	2157.44	726.277	0.336638	6	429151	29871	7	1322.08	99.87		ORF1a:T265I|ORF1a:E1209D|ORF1b:P314L|ORF3a:Q57H|S:D614G	20C	0.14.4	B.1.268	pangolin 3.1.3; PANGO-v1.2.13
1	MA_MGH_00468	SRR11954293	1041372	101	35.1386	594.617	266.037	0.447408	10	1041372	29897	67	373.876	99.76		ORF1a:T265I|ORF1a:E1209D|ORF1b:P314L|ORF3a:Q57H|S:D614G	20C	0.14.4	B.1.268	pangolin 3.1.3; PANGO-v1.2.13
1	MA_MGH_00475	SRR11953767	1372642	101	34.4188	327.179	134.671	0.411613	12	1372642	29897	51	205.987	99.81		ORF1a:T265I|ORF1a:E1209D|ORF1b:P314L|ORF3a:Q57H|S:D614G	20C	0.14.4	B.1.268	pangolin 3.1.3; PANGO-v1.2.13
1	MA_MGH_00476	SRR11954287	2053684	101	35.0929	7406.94	1035.93	0.139859	5	2053684	29902	32	6379.69	99.89		ORF1a:T265I|ORF1a:E1209D|ORF1b:P314L|ORF3a:Q57H|S:F32L|S:D614G	20C	0.14.4	B.1.268	pangolin 3.1.3; PANGO-v1.2.13

## Sheet: Dataset2 (n=39)
			FASTQC			Samtools depth					Titan
Dataset	ID	SRA	Total Reads	Read length	Mean phred score	Mean Depth per nucleotide (MDN)	Standard deviation (for MDN)	Coefficient of variation (for MDN)	Number of nucleotides with depth <10	Number of nucleotides with depth <20	Number of paired end reads	Assembly Total length	Ambigous Ns	Assembly mean coverage	% mapped to the Wuhan reference	nextclade_aa_dels	nextclade_aa_subs	nextclade_clade	nextclade_version	pango_lineage	pangolin_version
2	NORW-EEEFF_ARTIC_LoCost	ERR4969382	49936	400-699	19.2344	625.337	407.623	0.651845	74	240		29903	339	332.672	98.87		N:P13S|N:R203K|N:G204R|ORF1b:P314L|ORF1b:P1664S|ORF1b:Q2425H|ORF8:A65V|S:T124I|S:D614G|S:K1073N|S:C1250F	20B	0.14.4	B.1.1.240	pangolin 3.1.3; PUSHER-v1.2.13
2	NORW-EEEFF_CoronaHiT-Illumina	ERR4970051	569228	21-151	34.0146	3956.89	2491.74	0.629722	49	77	Uneven pairs: R1=569228, R2=553626	29812	43	2191.38	99.55		N:P13S|N:R203K|N:G204R|ORF1b:P314L|ORF1b:P1664S|ORF1b:Q2425H|ORF8:A65V|S:T124I|S:D614G|S:K1073N|S:C1250F	20B	0.14.4	B.1.1.240	pangolin 3.1.3; PUSHER-v1.2.13
2	NORW-EEEFF_CoronaHiT-ONT	ERR4969321	93772	206-600	19.9772	777.938	605.244	0.778011	195	514		29903	830	316.84	97.22		N:P13S|N:R203K|N:G204R|ORF1b:P314L|ORF1b:P1664S|ORF1b:Q2425H|ORF8:A65V|S:T124I|S:D614G|S:K1073N|S:C1250F	20B	0.14.4	B.1.1.240	pangolin 3.1.3; PUSHER-v1.2.13
2	NORW-EF91B_ARTIC_LoCost	ERR4969433	79275	400-700	19.0767	996.983	437.28	0.438603	67	234		29903	339	420.897	98.87		N:R203K|N:G204R|ORF1a:G493S|ORF1a:D3042N|ORF1b:P314L|ORF8:C20F|S:D614G	20B	0.14.4	B.1.1	pangolin 3.1.3; PUSHER-v1.2.13
2	NORW-EF91B_CoronaHiT-Illumina	ERR4970053	756220	21-151	33.99	5031.98	2353.21	0.467652	21	49	Uneven pairs: R1=756220, R2=737221	29831	34	2880.97	99.65		N:R203K|N:G204R|ORF1a:G493S|ORF1a:D3042N|ORF1b:P314L|ORF8:C20F|S:D614G	20B	0.14.4	B.1.1	pangolin 3.1.3; PUSHER-v1.2.13
2	NORW-EF91B_CoronaHiT-ONT	ERR4969340	97507	197-600	20.1158	790.024	509.479	0.644891	270	271		29903	339	337.752	98.87		N:R203K|N:G204R|ORF1a:G493S|ORF1a:D3042N|ORF1b:P314L|ORF8:C20F|S:D614G	20B	0.14.4	B.1.1	pangolin 3.1.3; PUSHER-v1.2.13
2	NORW-EF939_ARTIC_LoCost	ERR4969379	67583	400-700	18.9796	845.162	442.405	0.523456	67	68		29903	121	394.845	99.6		N:R203K|N:G204R|ORF1a:D203Y|ORF1a:T999I|ORF1b:P314L|ORF3a:A54S|ORF8:Q18*|ORF8:E110*|S:L5F|S:R190M|S:D614G	20B	0.14.4	B.1.1.198	pangolin 3.1.3; PANGO-v1.2.13
2	NORW-EF939_CoronaHiT-Illumina	ERR4970055	628876	21-151	34.0487	4519.08	2354.23	0.520954	46	49	Uneven pairs: R1=628876, R2=613412	29811	14	2509.91	99.65		N:R203K|N:G204R|ORF1a:D203Y|ORF1a:T999I|ORF1b:P314L|ORF3a:A54S|ORF8:Q18*|ORF8:E110*|S:L5F|S:R190M|S:D614G	20B	0.14.4	B.1.1.198	pangolin 3.1.3; PANGO-v1.2.13
2	NORW-EF939_CoronaHiT-ONT	ERR4969344	167435	189-600	20.299	1373.97	826.022	0.601195	84	86		29903	122	374.952	99.59		N:R203K|N:G204R|ORF1a:D203Y|ORF1a:T999I|ORF1b:P314L|ORF3a:A54S|ORF8:Q18*|ORF8:E110*|S:L5F|S:R190M|S:D614G	20B	0.14.4	B.1.1.198	pangolin 3.1.3; PUSHER-v1.2.13
2	NORW-EFD6A_ARTIC_LoCost	ERR4969393	87958	400-700	19.7291	1106.11	448.189	0.405196	67	67		29903	121	422.04	99.6		N:P13S|N:R203K|N:G204R|ORF1b:P314L|ORF1b:P1664S|ORF1b:Q2425H|ORF8:A65V|S:T124I|S:D614G|S:K1073N|S:C1250F	20B	0.14.4	B.1.1.240	pangolin 3.1.3; PUSHER-v1.2.13
2	NORW-EFD6A_CoronaHiT-Illumina	ERR4969997	162196	26-151	33.9841	1446.92	1163.77	0.804307	269	375	Uneven pairs: R1=162196, R2=158097	29834	534	607.939	97.98		N:P13S|N:R203K|N:G204R|ORF1b:P314L|ORF1b:P1664S|ORF1b:Q2425H|ORF8:A65V|S:T124I|S:D614G|S:K1073N|S:C1250F	20B	0.14.4	B.1.1.240	pangolin 3.1.3; PUSHER-v1.2.13
2	NORW-EFD6A_CoronaHiT-ONT	ERR4969338	81409	192-600	19.9218	622.066	392.564	0.631065	88	277		29903	495	314.898	98.34		N:P13S|N:R203K|N:G204R|ORF1b:P314L|ORF1b:P1664S|ORF1b:Q2425H|ORF8:A65V|S:T124I|S:D614G|S:K1073N|S:C1250F	20B	0.14.4	B.1.1.240	pangolin 3.1.3; PUSHER-v1.2.13
2	NORW-EFD88_ARTIC_LoCost	ERR4969394	93012	400-700	19.9385	1169.91	439.093	0.375321	67	67		29903	121	429.515	99.6		N:A55S|N:A220V|ORF1a:P1640S|ORF1b:P314L|ORF7a:A66T|S:A222V|S:E583Q|S:D614G	20E (EU1)	0.14.4	B.1.177.26	pangolin 3.1.3; PANGO-v1.2.13
2	NORW-EFD88_CoronaHiT-Illumina	ERR4969198	9796	24-151	34.0797	87.7272	80.7816	0.920828	918	1843	Uneven pairs: R1=9796, R2=9561	29782	2158	39.2683	92.38		N:A55S|N:A220V|ORF1a:P1640S|ORF1b:P314L|ORF7a:A66T|S:E583Q|S:D614G	20E (EU1)	0.14.4	B.1.177.26	pangolin 3.1.3; PUSHER-v1.2.13
2	NORW-EFD88_CoronaHiT-ONT	ERR4969317	123798	205-600	20.2493	979.536	655.755	0.669455	86	86		29903	121	365.787	99.6		N:A55S|N:A220V|ORF1a:P1640S|ORF1b:P314L|ORF7a:A66T|S:A222V|S:E583Q|S:D614G	20E (EU1)	0.14.4	B.1.177.26	pangolin 3.1.3; PANGO-v1.2.13
2	NORW-EFD97_ARTIC_LoCost	ERR4969434	44541	400-700	18.8029	557.567	421.446	0.755867	490	1303		29903	1661	291.904	94.45		M:L17I|N:R203K|N:G204R|ORF1a:A385V|ORF1a:A1298V|ORF1a:P2685T|ORF1b:P314L|ORF1b:A1798S|S:R21I|S:D614G	20B	0.14.4	B.1.1.279	pangolin 3.1.3; PUSHER-v1.2.13
2	NORW-EFD97_CoronaHiT-Illumina	ERR4969201	174960	22-151	34.0795	1500.38	1626.1	1.08379	660	999	Uneven pairs: R1=174960, R2=170494	29798	1315	703.553	95.25		M:L17I|N:R203K|N:G204R|ORF1a:A385V|ORF1a:A1298V|ORF1a:P2685T|ORF1b:P314L|ORF1b:A1798S|S:R21I|S:D614G	20B	0.14.4	B.1.1.279	pangolin 3.1.3; PUSHER-v1.2.13
2	NORW-EFD97_CoronaHiT-ONT	ERR4969347	97981	202-600	19.8769	789.115	711.829	0.90206	547	1605		29903	2276	288.778	92.39		M:L17I|N:R203K|N:G204R|ORF1a:A385V|ORF1a:A1298V|ORF1a:P2685T|ORF1b:P314L|ORF1b:A1798S|S:R21I|S:D614G	20B	0.14.4	B.1.1.279	pangolin 3.1.3; PUSHER-v1.2.13
2	NORW-EFDC4_ARTIC_LoCost	ERR4969399	92031	400-700	19.2953	1158.58	434.533	0.375056	67	67		29903	121	431.598	99.6		N:A220V|ORF1a:L3711F|ORF1b:P314L|S:L18F|S:D215H|S:A222V|S:D614G	20E (EU1)	0.14.4	B.1.177	pangolin 3.1.3; PANGO-v1.2.13
2	NORW-EFDC4_CoronaHiT-Illumina	ERR4969191	40082	24-151	34.0971	360.821	324.563	0.899512	412	607	Uneven pairs: R1=40082, R2=39222	29649	1771	59.6218	93.23		N:A220V|ORF1a:L3711F|ORF1b:P314L|S:L18F|S:D614G	20E (EU1)	0.14.4	B.1	pangolin 3.1.3; PUSHER-v1.2.13
2	NORW-EFDC4_CoronaHiT-ONT	ERR4969339	90140	205-600	20.3917	694.191	442.698	0.637718	86	205		29903	339	334.263	98.87		N:A220V|ORF1a:L3711F|ORF1b:P314L|S:L18F|S:D215H|S:A222V|S:D614G	20E (EU1)	0.14.4	B.1.177	pangolin 3.1.3; PUSHER-v1.2.13
2	NORW-EFDD3_ARTIC_LoCost	ERR4969396	92468	400-700	20.19	1163.9	453.514	0.389652	67	67		29903	121	425.599	99.6		ORF1a:G400D|ORF1a:A599V|ORF1a:I2501T|ORF1b:P314L|ORF1b:A520V|ORF1b:H1213Y|ORF1b:M1677I|S:N439K|S:D614G|S:A688V|S:D936Y	20A	0.14.4	B.1	pangolin 3.1.3; PUSHER-v1.2.13
2	NORW-EFDD3_CoronaHiT-Illumina	ERR4970008	60241	21-151	34.1221	549.785	552.11	1.00423	905	1039	Uneven pairs: R1=60241, R2=58941	29795	1045	253.27	96.14		ORF1a:G400D|ORF1a:A599V|ORF1a:I2501T|ORF1b:P314L|ORF1b:A520V|ORF1b:H1213Y|ORF1b:M1677I|S:N439K|S:D614G|S:A688V|S:D936Y	20A	0.14.4	B.1	pangolin 3.1.3; PUSHER-v1.2.13
2	NORW-EFDD3_CoronaHiT-ONT	ERR4969336	83575	205-600	20.3539	656.859	471.268	0.717456	263	530		29903	639	321.828	97.86		ORF1a:G400D|ORF1a:A599V|ORF1a:I2501T|ORF1b:P314L|ORF1b:A520V|ORF1b:H1213Y|ORF1b:M1677I|S:N439K|S:D614G|S:A688V|S:D936Y	20A	0.14.4	B.1	pangolin 3.1.3; PUSHER-v1.2.13
2	NORW-EFDE2_ARTIC_LoCost	ERR4969436	87063	400-700	19.0428	1095.28	446.51	0.407669	34	93		29903	121	424.961	99.6		N:A220V|ORF1b:P314L|ORF7b:E39*|S:L18F|S:A222V|S:D614G	20E (EU1)	0.14.4	B.1.177.86	pangolin 3.1.3; PANGO-v1.2.13
2	NORW-EFDE2_CoronaHiT-Illumina	ERR4970049	409605	21-151	34.0379	3379.59	1949.01	0.576699	202	235	Uneven pairs: R1=409605, R2=398078	29806	232	1580.29	98.9		N:A220V|ORF1b:P314L|ORF7b:E39*|S:L18F|S:A222V|S:D614G	20E (EU1)	0.14.4	B.1.177.86	pangolin 3.1.3; PUSHER-v1.2.13
2	NORW-EFDE2_CoronaHiT-ONT	ERR4969329	113766	211-600	20.6207	900.728	545.507	0.605629	86	90		29903	173	361.167	99.42		N:A220V|ORF1b:P314L|ORF7b:E39*|S:L18F|S:A222V|S:D614G	20E (EU1)	0.14.4	B.1.177.86	pangolin 3.1.3; PUSHER-v1.2.13
2	NORW-EFE1C_ARTIC_LoCost	ERR4969390	33510	403-700	19.3649	418.705	357.961	0.854925	921	1628		29903	2008	254.044	93.28		N:A220V|ORF1a:L3711F|ORF1b:P314L|S:L18F|S:D215H|S:A222V|S:D614G	20E (EU1)	0.14.4	B.1.177	pangolin 3.1.3; PUSHER-v1.2.13
2	NORW-EFE1C_CoronaHiT-Illumina	ERR4970006	314322	22-151	34.0725	2303.36	2257.93	0.980276	441	638	Uneven pairs: R1=314322, R2=306435	29798	678	1264.61	97.38		N:A220V|ORF1a:L3711F|ORF1b:P314L|S:L18F|S:D215H|S:A222V|S:D614G	20E (EU1)	0.14.4	B.1.177	pangolin 3.1.3; PUSHER-v1.2.13
2	NORW-EFE1C_CoronaHiT-ONT	ERR4969327	131984	204-600	20.0274	1080.43	1071.31	0.991562	614	1363		29903	2180	284.455	92.71		N:A220V|ORF1a:L3711F|ORF1b:P314L|S:L18F|S:D614G	20E (EU1)	0.14.4	B.1.177	pangolin 3.1.3; PUSHER-v1.2.13
2	NORW-EFE58_ARTIC_LoCost	ERR4969387	50560	400-700	19.3974	631.776	422.742	0.669134	270	679		29903	876	324.643	97.07		N:A220V|ORF1b:P314L|ORF3a:V163I|S:A222V|S:D614G	20E (EU1)	0.14.4	B.1.177.54	pangolin 3.1.3; PUSHER-v1.2.13
2	NORW-EFE58_CoronaHiT-Illumina	ERR4970009	260518	22-151	34.0883	2131.87	1910.76	0.896284	441	650	Uneven pairs: R1=260518, R2=253462	29798	857	1037.28	96.78		N:A220V|ORF1b:P314L|ORF3a:V163I|S:A222V|S:D614G	20E (EU1)	0.14.4	B.1.177.54	pangolin 3.1.3; PUSHER-v1.2.13
2	NORW-EFE58_CoronaHiT-ONT	ERR4969330	105571	195-600	20.3919	825.113	646.182	0.783144	248	561		29903	1226	306.915	95.9		N:A220V|ORF1b:P314L|ORF3a:V163I|S:A222V|S:D614G	20E (EU1)	0.14.4	B.1.177.54	pangolin 3.1.3; PUSHER-v1.2.13
2	NORW-EFE76_ARTIC_LoCost	ERR4969381	88193	400-700	19.4868	1108.98	442.27	0.398809	35	72		29903	121	425.167	99.6		N:A55S|N:A220V|ORF1a:P1640S|ORF1b:P314L|ORF7a:A66T|S:A222V|S:E583Q|S:D614G	20E (EU1)	0.14.4	B.1.177.26	pangolin 3.1.3; PANGO-v1.2.13
2	NORW-EFE76_CoronaHiT-Illumina	ERR4969999	100078	21-151	34.0576	870.066	675.236	0.776074	237	273	Uneven pairs: R1=100078, R2=97761	29798	376	381.685	98.39		N:A55S|N:A220V|ORF1a:P1640S|ORF1b:P314L|ORF7a:A66T|S:A222V|S:E583Q|S:D614G	20E (EU1)	0.14.4	B.1.177.26	pangolin 3.1.3; PUSHER-v1.2.13
2	NORW-EFE76_CoronaHiT-ONT	ERR4969354	147711	195-600	20.3413	1215.9	739.312	0.608037	84	87		29903	122	375.63	99.59		N:A55S|N:A220V|ORF1a:P1640S|ORF1b:P314L|ORF7a:A66T|S:A222V|S:E583Q|S:D614G	20E (EU1)	0.14.4	B.1.177.26	pangolin 3.1.3; PUSHER-v1.2.13
2	NORW-EFE85_ARTIC_LoCost	ERR4969440	94246	400-700	19.8983	1187.98	439.865	0.370264	67	67		29903	121	431.145	99.6		E:V58F|N:M234I|N:A376T|N:R385K|ORF1a:T253A|ORF1a:M3087I|ORF1b:A176S|ORF1b:P314L|ORF1b:V767L|ORF1b:K1141R|ORF1b:E1184D|ORF3a:Q57H|ORF7a:F6L|ORF8:G8V|S:S477N|S:D614G	20A	0.14.4	B.1.160	pangolin 3.1.3; PUSHER-v1.2.13
2	NORW-EFE85_CoronaHiT-Illumina	ERR4969995	128948	21-151	34.0584	1166.35	1031.46	0.884347	99	434	Uneven pairs: R1=128948, R2=125347	29798	529	496.515	97.88		E:V58F|N:M234I|N:A376T|N:R385K|ORF1a:T253A|ORF1a:M3087I|ORF1b:A176S|ORF1b:P314L|ORF1b:V767L|ORF1b:K1141R|ORF1b:E1184D|ORF3a:Q57H|ORF7a:F6L|ORF8:G8V|S:S477N|S:D614G	20A	0.14.4	B.1.160	pangolin 3.1.3; PUSHER-v1.2.13
2	NORW-EFE85_CoronaHiT-ONT	ERR4969326	72137	208-600	20.3056	549.133	360.9	0.657217	86	88		29903	205	299.058	99.31		E:V58F|N:M234I|N:A376T|N:R385K|ORF1a:T253A|ORF1a:M3087I|ORF1b:A176S|ORF1b:P314L|ORF1b:V767L|ORF1b:K1141R|ORF1b:E1184D|ORF3a:Q57H|ORF7a:F6L|ORF8:G8V|S:S477N|S:D614G	20A	0.14.4	B.1.160	pangolin 3.1.3; PUSHER-v1.2.13
2	NORW-EFEA3_ARTIC_LoCost	ERR4969385	87126	400-700	19.4468	1096.94	455.179	0.414951	67	230		29903	339	423.361	98.87		N:A55S|N:A220V|ORF1a:P1640S|ORF1b:P314L|ORF7a:A66T|S:A222V|S:E583Q|S:D614G	20E (EU1)	0.14.4	B.1.177.26	pangolin 3.1.3; PUSHER-v1.2.13
2	NORW-EFEA3_CoronaHiT-Illumina	ERR4970007	63695	23-151	34.1238	578.436	545.392	0.942874	709	767	Uneven pairs: R1=63695, R2=62314	29794	766	264.491	97.07		N:A55S|N:A220V|ORF1a:P1640S|ORF1b:P314L|ORF7a:A66T|S:A222V|S:E583Q|S:D614G	20E (EU1)	0.14.4	B.1.177.26	pangolin 3.1.3; PUSHER-v1.2.13
2	NORW-EFEA3_CoronaHiT-ONT	ERR4969334	83068	197-600	20.5718	617.965	402.329	0.651056	174	273		29903	347	309.58	98.84		N:A55S|N:A220V|ORF1a:P1640S|ORF1b:P314L|ORF7a:A66T|S:A222V|S:E583Q|S:D614G	20E (EU1)	0.14.4	B.1.177.26	pangolin 3.1.3; PUSHER-v1.2.13
2	NORW-EFEB2_ARTIC_LoCost	ERR4969386	78374	400-700	19.3963	985.576	442.216	0.448688	68	234		29902	339	417.075	98.86		N:A220V|ORF1a:L3606X|ORF1b:P314L|S:L18F|S:A222V|S:D614G	20E (EU1)	0.14.4	B.1.177.8	pangolin 3.1.3; PUSHER-v1.2.13
2	NORW-EFEB2_CoronaHiT-Illumina	ERR4970002	156394	21-151	33.9822	1372.16	1109.62	0.808666	237	272	Uneven pairs: R1=156394, R2=152784	29798	259	587.186	98.78		N:A220V|ORF1a:L3606F|ORF1b:P314L|S:L18F|S:A222V|S:D614G	20E (EU1)	0.14.4	B.1.177.8	pangolin 3.1.3; PUSHER-v1.2.13
2	NORW-EFEB2_CoronaHiT-ONT	ERR4969351	206591	194-600	20.7304	1636.47	1037.17	0.633785	82	84		29902	136	375.567	99.54		N:A220V|ORF1a:L3606X|ORF1b:P314L|S:L18F|S:A222V|S:D614G	20E (EU1)	0.14.4	B.1.177.8	pangolin 3.1.3; PUSHER-v1.2.13
2	NORW-EFFBF_ARTIC_LoCost	ERR4969401	90863	400-700	19.3982	1144.3	442.367	0.386583	67	67		29903	121	428.83	99.6		N:A220V|ORF1a:P286S|ORF1a:T2181I|ORF1a:A2554V|ORF1b:P314L|S:A222V|S:D614G	20E (EU1)	0.14.4	B.1.177.57	pangolin 3.1.3; PUSHER-v1.2.13
2	NORW-EFFBF_CoronaHiT-Illumina	ERR4970046	380811	21-151	34.0426	3102.06	1745.24	0.562608	153	238	Uneven pairs: R1=380811, R2=370099	29797	233	1470.48	98.87		N:A220V|ORF1a:P286S|ORF1a:T2181I|ORF1a:A2554V|ORF1b:P314L|S:A222V|S:D614G	20E (EU1)	0.14.4	B.1.177.57	pangolin 3.1.3; PUSHER-v1.2.13
2	NORW-EFFBF_CoronaHiT-ONT	ERR4969324	107534	206-600	20.2371	901.827	542.034	0.60104	86	272		29903	339	362.911	98.87		N:A220V|ORF1a:P286S|ORF1a:T2181I|ORF1a:A2554V|ORF1b:P314L|S:A222V|S:D614G	20E (EU1)	0.14.4	B.1.177.57	pangolin 3.1.3; PUSHER-v1.2.13
2	NORW-F0452_ARTIC_LoCost	ERR4969377	84819	400-700	19.1255	1064.89	434.758	0.408264	67	82		29903	121	425.964	99.6		N:R203K|N:G204R|ORF1a:D203Y|ORF1a:T999I|ORF1a:T3589I|ORF1a:T4129I|ORF1b:P314L|ORF3a:A54S|ORF8:Q18*|ORF8:E110*|S:R190M|S:D614G	20B	0.14.4	B.1.1.198	pangolin 3.1.3; PUSHER-v1.2.13
2	NORW-F0452_CoronaHiT-Illumina	ERR4970060	1186945	21-151	34.0677	6093.83	2078.1	0.341017	45	48	Uneven pairs: R1=1186945, R2=1161353	29799	2	4839.84	99.65		N:R203K|N:G204R|ORF1a:D203Y|ORF1a:T999I|ORF1a:T3589I|ORF1a:T4129I|ORF1b:P314L|ORF3a:A54S|ORF8:Q18*|ORF8:E110*|S:R190M|S:D614G	20B	0.14.4	B.1.1.198	pangolin 3.1.3; PUSHER-v1.2.13
2	NORW-F0452_CoronaHiT-ONT	ERR4969355	159087	207-600	20.2976	1267.07	762.442	0.601736	137	268		29903	339	372.18	98.87		N:R203K|N:G204R|ORF1a:D203Y|ORF1a:T999I|ORF1a:T3589I|ORF1a:T4129I|ORF1b:P314L|ORF3a:A54S|ORF8:Q18*|ORF8:E110*|S:R190M|S:D614G	20B	0.14.4	B.1.1.198	pangolin 3.1.3; PUSHER-v1.2.13
2	NORW-F0461_ARTIC_LoCost	ERR4969378	79471	401-700	19.26	998.252	442.933	0.443708	67	85		29903	122	420.502	99.59		N:A220V|ORF1a:A372T|ORF1b:P314L|S:L18F|S:H146Y|S:A222V|S:D614G	20E (EU1)	0.14.4	B.1.177	pangolin 3.1.3; PUSHER-v1.2.13
2	NORW-F0461_CoronaHiT-Illumina	ERR4970047	282536	20-151	34.0623	2432.23	1597.37	0.656749	69	238	Uneven pairs: R1=282536, R2=275869	29828	274	1118.29	98.83		N:A220V|ORF1a:A372T|ORF1a:R3012K|ORF1b:P314L|S:L18F|S:H146Y|S:A222V|S:D614G	20E (EU1)	0.14.4	B.1.177	pangolin 3.1.3; PUSHER-v1.2.13
2	NORW-F0461_CoronaHiT-ONT	ERR4969312	102643	204-600	20.089	798.723	523.886	0.655905	138	542		29903	635	332.11	97.88		N:A220V|ORF1a:A372T|ORF1b:P314L|S:L18F|S:H146Y|S:A222V|S:D614G	20E (EU1)	0.14.4	B.1.177	pangolin 3.1.3; PUSHER-v1.2.13
2	NORW-F04BC_ARTIC_LoCost	ERR4969388	27654	400-700	19.2738	345.47	325.743	0.942897	511	2395		29903	2861	219.198	90.43		N:R203K|N:G204R|N:A398V|ORF1a:I300F|ORF1a:P1786L|ORF1b:E245D|ORF1b:P314L|ORF1b:T2084I|ORF3a:T223I|ORF8:V32L|S:D614G	20B	0.14.4	AD.2	pangolin 3.1.3; PUSHER-v1.2.13
2	NORW-F04BC_CoronaHiT-Illumina	ERR4970058	782024	20-151	34.0452	4047.61	2844.4	0.702735	47	50	Uneven pairs: R1=782024, R2=765749	29825	27	3125.59	99.64		N:R203K|N:G204R|N:A398V|ORF1a:I300F|ORF1a:P1786L|ORF1b:E245D|ORF1b:P314L|ORF1b:M2025I|ORF1b:T2084I|ORF3a:T223I|ORF8:V32L|S:D614G	20B	0.14.4	AD.2	pangolin 3.1.3; PUSHER-v1.2.13
2	NORW-F04BC_CoronaHiT-ONT	ERR4969331	137779	203-600	20.524	1086.01	881.166	0.811379	267	373		29903	691	316.526	97.69		N:R203K|N:G204R|N:A398V|ORF1a:I300F|ORF1a:P1786L|ORF1b:E245D|ORF1b:P314L|ORF1b:M2025I|ORF1b:T2084I|ORF3a:T223I|ORF8:V32L|S:D614G	20B	0.14.4	AD.2	pangolin 3.1.3; PUSHER-v1.2.13
2	NORW-F04DA_ARTIC_LoCost	ERR4969432	17597	400-700	18.4569	218.983	240.068	1.09629	2827	4996		29903	5898	161.13	80.28		N:A220V|ORF1a:A1679V|ORF1b:P314L|ORF1b:A1259V|S:A222V|S:D614G	20E (EU1)	0.14.4	B.1.177	pangolin 3.1.3; PUSHER-v1.2.13
2	NORW-F04DA_CoronaHiT-Illumina	ERR4969200	327444	22-151	34.1113	2387.96	2416.66	1.01202	616	1335	Uneven pairs: R1=327444, R2=319657	29798	1319	1337	95.24		N:A220V|ORF1a:A1679V|ORF1a:A3620P|ORF1b:P314L|ORF1b:A1259V|S:L18F|S:A222V|S:D614G	20E (EU1)	0.14.4	B.1.177	pangolin 3.1.3; PUSHER-v1.2.13
2	NORW-F04DA_CoronaHiT-ONT	ERR4969357	130209	198-600	19.9347	1054.8	1059.92	1.00485	300	1437		29903	2439	279.456	91.84		N:A220V|ORF1a:A1679V|ORF1b:P314L|ORF1b:A1259V|S:L18F|S:D614G	20E (EU1)	0.14.4	B.1.177	pangolin 3.1.3; PUSHER-v1.2.13
2	NORW-F0504_ARTIC_LoCost	ERR4969373	39982	400-700	19.1433	500.04	390.778	0.781493	794	1343		29903	1749	280.314	94.15		N:A220V|ORF1b:P314L|S:H146Y|S:A222V|S:D614G	20E (EU1)	0.14.4	B.1.177	pangolin 3.1.3; PUSHER-v1.2.13
2	NORW-F0504_CoronaHiT-Illumina	ERR4969192	204090	22-151	34.0409	1703.3	1698.89	0.997413	526	787	Uneven pairs: R1=204090, R2=200842	29798	907	831.077	96.62		N:A220V|ORF1b:P314L|S:L18F|S:H146Y|S:A222V|S:D614G	20E (EU1)	0.14.4	B.1.177	pangolin 3.1.3; PUSHER-v1.2.13
2	NORW-F0504_CoronaHiT-ONT	ERR4969315	106867	191-600	20.3861	824.539	667.971	0.810115	269	557		29903	1183	300.442	96.04		N:A220V|ORF1b:P314L|S:L18F|S:H146Y|S:A222V|S:D614G	20E (EU1)	0.14.4	B.1.177	pangolin 3.1.3; PUSHER-v1.2.13
2	NORW-F0513_ARTIC_LoCost	ERR4969380	87946	400-700	19.484	1108.16	459.513	0.414663	299	301		29899	403	421.417	98.64	S:N211-	N:S194L|ORF1a:L590F|ORF1a:T753I|ORF1a:T1822I|ORF1a:A3220V|ORF1a:L3606X|ORF1a:A3615V|ORF1b:P314L|ORF3a:Q57H|ORF9b:E85D|S:I210N|S:D614G|S:T859N	20A	0.14.4	B.1.36.9	pangolin 3.1.3; PUSHER-v1.2.13
2	NORW-F0513_CoronaHiT-Illumina	ERR4969998	201339	21-151	33.9956	1765.56	1391.26	0.788002	453	711	Uneven pairs: R1=201339, R2=196240	29794	810	756.682	96.93	S:N211-	N:S194L|ORF1a:L590F|ORF1a:T753I|ORF1a:T1822I|ORF1a:A3220V|ORF1a:L3606F|ORF1a:A3615V|ORF1b:P314L|ORF3a:Q57H|ORF9b:E85D|S:I210N|S:D614G|S:T859N	20A	0.14.4	B.1.36.9	pangolin 3.1.3; PUSHER-v1.2.13
2	NORW-F0513_CoronaHiT-ONT	ERR4969335	71203	194-600	20.2204	541.064	370.4	0.684577	335	713		29899	916	292.108	96.92	S:N211-	N:S194L|ORF1a:L590F|ORF1a:T753I|ORF1a:T1822I|ORF1a:A3220V|ORF1a:L3606X|ORF1a:A3615V|ORF1b:P314L|ORF3a:Q57H|ORF9b:E85D|S:I210N|S:D614G|S:T859N	20A	0.14.4	B.1.36.9	pangolin 3.1.3; PUSHER-v1.2.13
2	NORW-F05F5_ARTIC_LoCost	ERR4969429	91532	400-700	19.1328	1153.86	455.717	0.394949	300	300		29899	404	423.992	98.64	S:N211-	N:S194L|ORF1a:L590F|ORF1a:T753I|ORF1a:T1822I|ORF1a:A3220V|ORF1a:L3606X|ORF1a:A3615V|ORF1b:P314L|ORF3a:Q57H|ORF9b:E85D|S:I210N|S:D614G|S:T859N	20A	0.14.4	B.1.36.9	pangolin 3.1.3; PUSHER-v1.2.13
2	NORW-F05F5_CoronaHiT-Illumina	ERR4970056	502924	22-151	34.0459	3964.23	2077.52	0.524066	205	480	Uneven pairs: R1=502924, R2=489943	29795	456	1959.3	98.11	S:N211-	N:S194L|ORF1a:L590F|ORF1a:T753I|ORF1a:T1822I|ORF1a:A3220V|ORF1a:L3606F|ORF1a:A3615V|ORF1b:P314L|ORF3a:Q57H|ORF9b:E85D|S:I210N|S:D614G|S:T859N	20A	0.14.4	B.1.36.9	pangolin 3.1.3; PUSHER-v1.2.13
2	NORW-F05F5_CoronaHiT-ONT	ERR4969322	128636	202-600	20.3493	980.128	637.539	0.650465	332	771		29899	917	343.919	96.92	S:N211-	N:S194L|ORF1a:L590F|ORF1a:T753I|ORF1a:T1822I|ORF1a:A3220V|ORF1a:L3606X|ORF1a:A3615V|ORF1b:P314L|ORF3a:Q57H|ORF9b:E85D|S:I210N|S:D614G|S:T859N	20A	0.14.4	B.1.36.9	pangolin 3.1.3; PUSHER-v1.2.13
2	NORW-F067A_ARTIC_LoCost	ERR4969376	82303	400-700	19.2804	1037.21	452.858	0.436612	126	432		29903	588	419.747	98.03		N:S194L|ORF1a:V561A|ORF1a:K798N|ORF1b:P314L|ORF1b:T1540I|ORF1b:A2028S|ORF3a:Q57H|ORF3a:Q185H|ORF3a:G224C|S:D614G|S:P1263T	20A	0.14.4	B.1.36.2	pangolin 3.1.3; PUSHER-v1.2.13
2	NORW-F067A_CoronaHiT-Illumina	ERR4970054	527018	20-151	34.0204	4076.53	2270.43	0.556951	49	130	Uneven pairs: R1=527018, R2=515742	29814	261	2080.48	98.83		N:S194L|ORF1a:V561A|ORF1a:K798N|ORF1b:P314L|ORF1b:T1540I|ORF1b:A2028S|ORF3a:Q57H|ORF3a:Q185H|ORF3a:G224C|S:D614G|S:P1263T	20A	0.14.4	B.1.36.2	pangolin 3.1.3; PUSHER-v1.2.13
2	NORW-F067A_CoronaHiT-ONT	ERR4969323	104130	203-600	19.8974	827.932	518.936	0.626786	302	482		29903	588	343.424	98.03		N:S194L|ORF1a:V561A|ORF1a:K798N|ORF1b:P314L|ORF1b:T1540I|ORF1b:A2028S|ORF3a:Q57H|ORF3a:Q185H|ORF3a:G224C|S:D614G|S:P1263T	20A	0.14.4	B.1.36.2	pangolin 3.1.3; PUSHER-v1.2.13
2	NORW-F06C5_ARTIC_LoCost	ERR4969392	82735	400-700	19.1888	1039.58	447.646	0.430603	67	67		29903	121	421.992	99.6		N:R203K|N:G204R|ORF1a:D203Y|ORF1a:T999I|ORF1b:P314L|ORF3a:A54S|ORF8:Q18*|ORF8:E110*|S:R190M|S:D614G	20B	0.14.4	B.1.1.198	pangolin 3.1.3; PANGO-v1.2.13
2	NORW-F06C5_CoronaHiT-Illumina	ERR4970003	255907	20-151	34.1346	2218.48	1609.51	0.725502	50	255	Uneven pairs: R1=255907, R2=250658	29798	319	1060.41	98.58		N:R203K|N:G204R|ORF1a:D203Y|ORF1a:T999I|ORF1b:P314L|ORF3a:A54S|ORF8:Q18*|ORF8:E110*|S:R190M|S:D614G	20B	0.14.4	B.1.1.198	pangolin 3.1.3; PUSHER-v1.2.13
2	NORW-F06C5_CoronaHiT-ONT	ERR4969341	92427	207-600	20.7106	709.413	515.573	0.72676	529	747		29903	953	306.537	96.81		N:R203K|N:G204R|ORF1a:D203Y|ORF1a:T999I|ORF1b:P314L|ORF3a:A54S|ORF8:Q18*|ORF8:E110*|S:R190M|S:D614G	20B	0.14.4	B.1.1.198	pangolin 3.1.3; PUSHER-v1.2.13
2	NORW-F06E3_ARTIC_LoCost	ERR4969395	94524	400-699	20.681	1193.47	434.104	0.363734	67	67		29903	121	436.869	99.6		N:R203K|N:G204R|N:A398V|ORF1a:I300F|ORF1a:P1786L|ORF1b:E245D|ORF1b:P314L|ORF1b:M2025I|ORF1b:T2084I|ORF3a:T223I|ORF8:V32L|S:D614G	20B	0.14.4	AD.2	pangolin 3.1.3; PANGO-v1.2.13
2	NORW-F06E3_CoronaHiT-Illumina	ERR4970057	777609	21-151	34.0956	5110.34	2191.15	0.428768	47	49	Uneven pairs: R1=777609, R2=759799	29849	67	3168.37	99.6		N:R203K|N:G204R|N:A398V|ORF1a:I300F|ORF1a:P1786L|ORF1b:E245D|ORF1b:P314L|ORF1b:M2025I|ORF1b:T2084I|ORF3a:T223I|ORF8:V32L|S:D614G	20B	0.14.4	AD.2	pangolin 3.1.3; PANGO-v1.2.13
2	NORW-F06E3_CoronaHiT-ONT	ERR4969346	174336	209-600	20.4092	1384.61	850.599	0.614322	83	86		29903	121	379.553	99.6		N:R203K|N:G204R|N:A398V|ORF1a:I300F|ORF1a:P1786L|ORF1b:E245D|ORF1b:P314L|ORF1b:M2025I|ORF1b:T2084I|ORF3a:T223I|ORF8:V32L|S:D614G	20B	0.14.4	AD.2	pangolin 3.1.3; PANGO-v1.2.13
2	NORW-F072C_ARTIC_LoCost	ERR4969383	32566	400-700	19.4766	407.454	341.612	0.838406	726	1171		29903	1468	256.412	95.09		N:R203K|N:G204R|ORF1a:D203Y|ORF1a:T999I|ORF1b:P314L|ORF3a:A54S|ORF8:Q18*|ORF8:E110*|S:R190M|S:D614G	20B	0.14.4	B.1.1.198	pangolin 3.1.3; PUSHER-v1.2.13
2	NORW-F072C_CoronaHiT-Illumina	ERR4970059	870434	21-151	34.0076	5266.52	2398.64	0.45545	48	50	Uneven pairs: R1=870434, R2=847687	29803	23	3383.13	99.59		N:R203K|N:G204R|ORF1a:D203Y|ORF1a:T999I|ORF1b:P314L|ORF3a:A54S|ORF8:Q18*|ORF8:E110*|S:R190M|S:D614G	20B	0.14.4	B.1.1.198	pangolin 3.1.3; PUSHER-v1.2.13
2	NORW-F072C_CoronaHiT-ONT	ERR4969345	143375	184-600	20.366	1151.24	904.875	0.785998	85	283		29903	555	329.743	98.14		N:R203K|N:G204R|ORF1a:D203Y|ORF1a:T999I|ORF1b:P314L|ORF3a:A54S|ORF8:Q18*|ORF8:E110*|S:R190M|S:D614G	20B	0.14.4	B.1.1.198	pangolin 3.1.3; PUSHER-v1.2.13
2	NORW-F0759_ARTIC_LoCost	ERR4969428	89670	400-699	20.0543	1129.34	445.05	0.39408	67	67		29903	121	428.1	99.6		N:R203K|N:G204R|ORF1a:D203Y|ORF1a:T999I|ORF1b:P314L|ORF3a:A54S|ORF8:Q18*|ORF8:E110*|S:R190M|S:D614G	20B	0.14.4	B.1.1.198	pangolin 3.1.3; PANGO-v1.2.13
2	NORW-F0759_CoronaHiT-Illumina	ERR4970044	248282	23-151	34.0379	2149.28	1489.21	0.692887	220	238	Uneven pairs: R1=248282, R2=242487	29798	258	963.958	98.79		N:R203K|N:G204R|ORF1a:D203Y|ORF1a:T999I|ORF1b:P314L|ORF3a:A54S|ORF8:Q18*|ORF8:E110*|S:R190M|S:D614G	20B	0.14.4	B.1.1.198	pangolin 3.1.3; PUSHER-v1.2.13
2	NORW-F0759_CoronaHiT-ONT	ERR4969337	86131	198-600	20.2806	673.746	452.318	0.671348	87	275		29903	348	324.687	98.84		N:R203K|N:G204R|ORF1a:D203Y|ORF1a:T999I|ORF1b:P314L|ORF3a:A54S|ORF8:Q18*|ORF8:E110*|S:R190M|S:D614G	20B	0.14.4	B.1.1.198	pangolin 3.1.3; PUSHER-v1.2.13
2	NORW-F07FF_ARTIC_LoCost	ERR4969426	64766	401-700	19.0724	810.055	448.383	0.553522	77	298		29903	339	376.962	98.87		N:A220V|ORF1b:P314L|S:A222V|S:D614G	20E (EU1)	0.14.4	B.1.177	pangolin 3.1.3; PANGO-v1.2.13
2	NORW-F07FF_CoronaHiT-Illumina	ERR4970050	415061	21-151	34.0521	3295.22	2276.12	0.690736	131	419	Uneven pairs: R1=415061, R2=405946	29798	361	1657.42	98.44		N:A220V|ORF1b:P314L|S:A222V|S:A262S|S:D614G	20E (EU1)	0.14.4	B.1.177	pangolin 3.1.3; PUSHER-v1.2.13
2	NORW-F07FF_CoronaHiT-ONT	ERR4969314	111672	204-600	20.1377	842.492	599.748	0.711873	261	542		29903	655	317.314	97.81		N:A220V|ORF1b:P314L|S:A222V|S:D614G	20E (EU1)	0.14.4	B.1.177	pangolin 3.1.3; PUSHER-v1.2.13
2	NORW-F08DE_ARTIC_LoCost	ERR4969400	64038	400-700	19.4774	800.899	450.118	0.562017	99	563		29903	712	372.48	97.62		N:A220V|N:G243V|ORF1a:A565V|ORF1b:P314L|S:L18F|S:A222V|S:D614G	20E (EU1)	0.14.4	B.1.177	pangolin 3.1.3; PUSHER-v1.2.13
2	NORW-F08DE_CoronaHiT-Illumina	ERR4970052	381920	21-151	34.048	3056.5	2225.11	0.727993	251	373	Uneven pairs: R1=381920, R2=372180	29798	419	1500.63	98.24		N:A220V|ORF1a:A565V|ORF1b:P314L|ORF7b:S5L|S:L18F|S:A222V|S:D614G	20E (EU1)	0.14.4	B.1.177	pangolin 3.1.3; PUSHER-v1.2.13
2	NORW-F08DE_CoronaHiT-ONT	ERR4969320	112201	202-600	20.3161	862.729	643.744	0.746173	534	747		29903	1003	314.374	96.65		N:A220V|N:G243V|ORF1a:A565V|ORF1b:P314L|S:L18F|S:A222V|S:D614G	20E (EU1)	0.14.4	B.1.177	pangolin 3.1.3; PUSHER-v1.2.13
2	NORW-F0917_ARTIC_LoCost	ERR4969431	86010	400-699	19.655	1082.74	446.426	0.412312	67	71		29903	121	423.607	99.6		N:R203K|N:G204R|ORF1a:D203Y|ORF1a:T999I|ORF1b:P314L|ORF3a:A54S|ORF8:Q18*|ORF8:E110*|S:R190M|S:D614G	20B	0.14.4	B.1.1.198	pangolin 3.1.3; PANGO-v1.2.13
2	NORW-F0917_CoronaHiT-Illumina	ERR4970005	150812	22-151	34.0444	1351.29	1131.43	0.837301	236	414	Uneven pairs: R1=150812, R2=147106	29797	341	587.501	98.51		N:R203K|N:G204R|ORF1a:D203Y|ORF1a:T999I|ORF1b:P314L|ORF3a:A54S|ORF8:Q18*|ORF8:E110*|S:R190M|S:D614G	20B	0.14.4	B.1.1.198	pangolin 3.1.3; PUSHER-v1.2.13
2	NORW-F0917_CoronaHiT-ONT	ERR4969319	120086	207-600	20.2177	935.048	584.668	0.625281	126	531		29903	634	346.331	97.88		N:R203K|N:G204R|ORF1a:D203Y|ORF1a:T999I|ORF1b:P314L|ORF3a:A54S|ORF8:Q18*|ORF8:E110*|S:R190M|S:D614G	20B	0.14.4	B.1.1.198	pangolin 3.1.3; PUSHER-v1.2.13
2	NORW-F0962_ARTIC_LoCost	ERR4969438	88903	400-700	19.3455	1119.28	449	0.40115	67	234		29903	339	425.763	98.87		N:R203K|N:G204R|ORF1a:D203Y|ORF1a:T999I|ORF1b:P314L|ORF3a:A54S|ORF8:Q18*|ORF8:E110*|S:R190M|S:D614G	20B	0.14.4	B.1.1.198	pangolin 3.1.3; PUSHER-v1.2.13
2	NORW-F0962_CoronaHiT-Illumina	ERR4970000	152659	21-151	33.9838	1372.59	1176.81	0.85736	238	538	Uneven pairs: R1=152659, R2=148563	29835	692	571.143	97.46		N:R203K|N:G204R|ORF1a:D203Y|ORF1a:T999I|ORF1b:P314L|ORF3a:A54S|ORF8:Q18*|ORF8:E110*|S:R190M|S:D614G	20B	0.14.4	B.1.1.198	pangolin 3.1.3; PUSHER-v1.2.13
2	NORW-F0962_CoronaHiT-ONT	ERR4969318	78084	196-600	19.6775	606.962	397.213	0.654428	270	535		29903	634	311.809	97.88		N:R203K|N:G204R|ORF1a:D203Y|ORF1a:T999I|ORF1b:P314L|ORF3a:A54S|ORF8:Q18*|ORF8:E110*|S:R190M|S:D614G	20B	0.14.4	B.1.1.198	pangolin 3.1.3; PUSHER-v1.2.13
2	NORW-F099F_ARTIC_LoCost	ERR4969398	75423	401-700	19.3961	946.952	448.994	0.474147	67	67		29903	121	410.925	99.6		N:R203K|N:G204R|ORF1a:G493S|ORF1a:D3042N|ORF1b:P314L|ORF8:C20F|S:D614G	20B	0.14.4	B.1.1	pangolin 3.1.3; PUSHER-v1.2.13
2	NORW-F099F_CoronaHiT-Illumina	ERR4969996	177142	21-151	33.9883	1553.75	1313.35	0.84528	345	532	Uneven pairs: R1=177142, R2=172685	29798	550	669.472	97.81		N:R203K|N:G204R|ORF1a:G493S|ORF1a:D3042N|ORF1b:P314L|ORF8:C20F|S:D614G	20B	0.14.4	B.1.1	pangolin 3.1.3; PUSHER-v1.2.13
2	NORW-F099F_CoronaHiT-ONT	ERR4969348	121724	190-600	20.2015	965.826	661.297	0.684696	86	271		29903	634	337.403	97.88		N:R203K|N:G204R|ORF1a:G493S|ORF1a:D3042N|ORF1b:P314L|ORF8:C20F|S:D614G	20B	0.14.4	B.1.1	pangolin 3.1.3; PUSHER-v1.2.13
2	NORW-F09DB_ARTIC_LoCost	ERR4969391	32071	400-700	19.5605	400.204	349.757	0.873947	1172	1823		29903	2057	244.9	93.12		N:R203K|N:G204R|ORF1a:D203Y|ORF1a:T999I|ORF1a:T4129I|ORF1b:P314L|ORF3a:A54S|ORF8:Q18*|ORF8:E110*|S:R190M|S:D614G	20B	0.14.4	B.1.1.198	pangolin 3.1.3; PUSHER-v1.2.13
2	NORW-F09DB_CoronaHiT-Illumina	ERR4969199	192673	22-151	34.0934	1577.18	1692.97	1.07342	523	962	Uneven pairs: R1=192673, R2=188427	29798	1122	791.661	95.9		N:R203K|N:G204R|ORF1a:D203Y|ORF1a:T999I|ORF1a:T4129I|ORF1b:P314L|ORF3a:A54S|ORF8:Q18*|ORF8:E110*|S:R190M|S:D614G	20B	0.14.4	B.1.1.198	pangolin 3.1.3; PUSHER-v1.2.13
2	NORW-F09DB_CoronaHiT-ONT	ERR4969349	118623	199-600	19.8787	937.853	839.87	0.895524	851	1005		29903	1490	298.162	95.02		N:R203K|N:G204R|ORF1a:D203Y|ORF1a:T999I|ORF1a:T4129I|ORF1b:P314L|ORF3a:A54S|ORF8:Q18*|ORF8:E110*|S:R190M|S:D614G	20B	0.14.4	B.1.1.198	pangolin 3.1.3; PUSHER-v1.2.13
2	NORW-F09F9_ARTIC_LoCost	ERR4969435	92593	400-700	20.2138	1167.25	451.559	0.386859	34	67		29903	121	426.065	99.6		N:A220V|ORF1a:T2181I|ORF1a:A2554V|ORF1b:P314L|S:A222V|S:D614G	20E (EU1)	0.14.4	B.1.177.57	pangolin 3.1.3; PANGO-v1.2.13
2	NORW-F09F9_CoronaHiT-Illumina	ERR4970045	556687	21-151	34.0746	4267.12	2105.43	0.493408	112	236	Uneven pairs: R1=556687, R2=543263	29835	255	2218.84	98.92		N:A220V|ORF1a:T2181I|ORF1a:A2554V|ORF1b:P314L|S:A222V|S:D614G	20E (EU1)	0.14.4	B.1.177.57	pangolin 3.1.3; PUSHER-v1.2.13
2	NORW-F09F9_CoronaHiT-ONT	ERR4969316	128908	205-600	19.8337	1078.19	685.322	0.63562	86	90		29903	150	370.11	99.5		N:A220V|ORF1a:T2181I|ORF1a:A2554V|ORF1b:P314L|S:A222V|S:D614G	20E (EU1)	0.14.4	B.1.177.57	pangolin 3.1.3; PUSHER-v1.2.13
2	NORW-F0A23_ARTIC_LoCost	ERR4969430	90848	400-698	19.5487	1145.18	446.247	0.389673	67	67		29903	121	428.449	99.6		N:S194L|ORF1a:V561A|ORF1a:K798N|ORF1b:P314L|ORF1b:A2028S|ORF3a:Q57H|ORF3a:Q185H|ORF3a:G224C|S:D614G|S:P1263T	20A	0.14.4	B.1.36.2	pangolin 3.1.3; PUSHER-v1.2.13
2	NORW-F0A23_CoronaHiT-Illumina	ERR4970048	341115	22-151	34.0833	2902.66	2016.75	0.694796	50	51	Uneven pairs: R1=341115, R2=334583	29797	15	1388.29	99.6		N:S194L|ORF1a:V561A|ORF1a:K798N|ORF1b:P314L|ORF1b:A2028S|ORF3a:Q57H|ORF3a:Q185H|ORF3a:G224C|S:D614G|S:P1263T	20A	0.14.4	B.1.36.2	pangolin 3.1.3; PUSHER-v1.2.13
2	NORW-F0A23_CoronaHiT-ONT	ERR4969332	134640	184-600	20.4084	1103.1	753.057	0.682671	86	87		29903	121	368.487	99.6		N:S194L|ORF1a:V561A|ORF1a:K798N|ORF1b:P314L|ORF1b:A2028S|ORF3a:Q57H|ORF3a:Q185H|ORF3a:G224C|S:D614G|S:P1263T	20A	0.14.4	B.1.36.2	pangolin 3.1.3; PUSHER-v1.2.13
2	NORW-F0A32_ARTIC_LoCost	ERR4969384	32091	400-700	19.5498	401.846	353.169	0.878868	991	1845		29899	2280	243.464	92.36	S:N211-	N:S194L|ORF1a:L590F|ORF1a:T753I|ORF1a:T1822I|ORF1a:A3220V|ORF1a:L3606X|ORF1a:A3615V|ORF1b:P314L|ORF3a:Q57H|ORF9b:E85D|S:I210N|S:D614G|S:T859N	20A	0.14.4	B.1.36.9	pangolin 3.1.3; PUSHER-v1.2.13
2	NORW-F0A32_CoronaHiT-Illumina	ERR4970062	2015203	21-151	34.0028	5744.1	2683.35	0.46715	290	294	Uneven pairs: R1=2015203, R2=1959546	29833	306	7937.09	98.74	S:N211-	N:S194L|ORF1a:L590F|ORF1a:T753I|ORF1a:T1822I|ORF1a:A3220V|ORF1a:L3606F|ORF1a:A3615V|ORF1b:P314L|ORF3a:Q57H|ORF9b:E85D|S:I210N|S:D614G|S:T859N	20A	0.14.4	B.1.36.9	pangolin 3.1.3; PUSHER-v1.2.13
2	NORW-F0A32_CoronaHiT-ONT	ERR4969342	150495	206-600	20.0909	1288.25	1154.55	0.896215	712	765		29899	978	326.66	96.72	S:N211-	N:S194L|ORF1a:L590F|ORF1a:T753I|ORF1a:T1822I|ORF1a:A3220V|ORF1a:L3606X|ORF1a:A3615V|ORF1b:P314L|ORF3a:Q57H|ORF9b:E85D|S:I210N|S:D614G|S:T859N	20A	0.14.4	B.1.36.9	pangolin 3.1.3; PUSHER-v1.2.13
2	NORW-F0A50_ARTIC_LoCost	ERR4969427	88311	400-700	19.2445	1110.76	446.899	0.402338	67	67		29897	121	425.254	99.58	ORF1a:M85-|ORF1a:V86-	M:G6D|N:R203K|N:G204R|ORF1a:D203Y|ORF1a:T999I|ORF1a:Q4100H|ORF1b:P314L|ORF3a:A54S|ORF8:Q18*|ORF8:E110*|S:R190M|S:D614G	20B	0.14.4	B.1.1.198	pangolin 3.1.3; PANGO-v1.2.13
2	NORW-F0A50_CoronaHiT-Illumina	ERR4970004	191700	22-151	34.1125	1706.49	1388.66	0.813755	237	273	Uneven pairs: R1=191700, R2=187843	29792	234	793.177	98.85	ORF1a:M85-|ORF1a:V86-	M:G6D|N:R203K|N:G204R|ORF1a:D203Y|ORF1a:T999I|ORF1a:Q4100H|ORF1b:P314L|ORF3a:A54S|ORF8:Q18*|ORF8:E110*|S:R190M|S:D614G	20B	0.14.4	B.1.1.198	pangolin 3.1.3; PUSHER-v1.2.13
2	NORW-F0A50_CoronaHiT-ONT	ERR4969313	97548	209-600	20.2896	776.512	512.028	0.659395	84	266		29897	339	340.635	98.85	ORF1a:M85-|ORF1a:V86-	M:G6D|N:R203K|N:G204R|ORF1a:D203Y|ORF1a:T999I|ORF1a:Q4100H|ORF1b:P314L|ORF3a:A54S|ORF8:Q18*|ORF8:E110*|S:R190M|S:D614G	20B	0.14.4	B.1.1.198	pangolin 3.1.3; PUSHER-v1.2.13
2	NORW-F0A6F_ARTIC_LoCost	ERR4969397	86510	400-700	19.2733	1087.89	450.36	0.413976	233	235		29903	339	422.876	98.87		N:R203K|N:G204R|ORF1a:D203Y|ORF1a:T999I|ORF1b:P314L|ORF3a:A54S|ORF8:Q18*|ORF8:E110*|S:R190M|S:D614G	20B	0.14.4	B.1.1.198	pangolin 3.1.3; PUSHER-v1.2.13
2	NORW-F0A6F_CoronaHiT-Illumina	ERR4970001	59138	23-151	34.0982	540.556	475.351	0.879374	529	754	Uneven pairs: R1=59138, R2=57861	29782	753	239.928	97.08		N:R203K|N:G204R|ORF1a:D203Y|ORF1a:T999I|ORF1b:P314L|ORF3a:A54S|ORF8:Q18*|ORF8:E110*|S:R190M|S:D614G	20B	0.14.4	B.1.1.198	pangolin 3.1.3; PUSHER-v1.2.13
2	NORW-F0A6F_CoronaHiT-ONT	ERR4969353	122934	192-600	20.1959	993.792	636.235	0.640209	117	532		29903	634	356.825	97.88		N:R203K|N:G204R|ORF1a:D203Y|ORF1a:T999I|ORF1b:P314L|ORF3a:A54S|ORF8:Q18*|ORF8:E110*|S:R190M|S:D614G	20B	0.14.4	B.1.1.198	pangolin 3.1.3; PUSHER-v1.2.13

## Sheet: Dataset3 (n=69)
			FASTQC			Samtools depth								Titan
Dataset	ID	SRA	Total Reads	Read length	Mean phred score	Mean Depth per nucleotide (MDN)	Standard deviation (for MDN)	Coefficient of variation (for MDN)	Number of nucleotides with depth <10	Number of nucleotides with depth <20	Number of paired end reads	Assembly Total length	Ambigous Ns	Assembly mean coverage	% mapped to the Wuhan reference	nextclade_aa_dels	nextclade_aa_subs	nextclade_clade	nextclade_version	pango_lineage	pangolin_version
3	NORW-EB232_ARTIC_LoCost	ERR4969060	41895	404-691	19.2912	525.167	393.82	0.749895	730	1115		29903	1426	297.092	95.23		N:R203K|N:G204R|ORF1a:G1101D|ORF1a:H3076Y|ORF1b:P314L|S:D614G	20B	0.14.4	B.1.1	pangolin 3.1.3; PUSHER-v1.2.13
3	NORW-EB232_CoronaHiT-Illumina	ERR4970123	926917	21-151	33.6804	4756.79	2743.17	0.576684	260	266	Uneven pairs: R1=926917, R2=908870	29800	252	3151.26	98.81		N:R203K|N:G204R|ORF1a:G1101D|ORF1a:H3076Y|ORF1b:P314L|S:D614G	20B	0.14.4	B.1.1	pangolin 3.1.3; PUSHER-v1.2.13
3	NORW-EB232_CoronaHiT-ONT	ERR4968998	96454	206-600	20.2994	656.446	584.037	0.889695	821	1456		29903	2240	244.557	92.51		N:R203K|N:G204R|ORF1a:G1101D|ORF1a:H3076Y|ORF1b:P314L|S:D614G	20B	0.14.4	B.1.1	pangolin 3.1.3; PUSHER-v1.2.13
3	NORW-EB26F_ARTIC_LoCost	ERR4969068	76591	400-700	19.8162	962.571	451.216	0.468761	67	67		29903	121	409.109	99.6		ORF1a:P892L|ORF1b:P314L|S:P272S|S:D614G	20A	0.14.4	B.1.201	pangolin 3.1.3; PANGO-v1.2.13
3	NORW-EB26F_CoronaHiT-Illumina	ERR4970102	580827	21-151	33.6473	4454.11	2333.81	0.523969	49	50	Uneven pairs: R1=580827, R2=567373	29798	1	1917.9	99.65		ORF1a:P892L|ORF1b:P314L|S:P272S|S:D614G	20A	0.14.4	B.1.201	pangolin 3.1.3; PANGO-v1.2.13
3	NORW-EB26F_CoronaHiT-ONT	ERR4968970	113017	199-600	20.6073	776.992	472.985	0.608739	231	418		29903	693	316.787	97.68		ORF1a:P892L|ORF1b:P314L|S:D614G	20A	0.14.4	B.1.201	pangolin 3.1.3; PUSHER-v1.2.13
3	NORW-EB28D_ARTIC_LoCost	ERR4969079	95570	404-700	19.91	1206.71	430.784	0.356991	67	67		29903	121	438.219	99.6		N:R203K|N:G204R|ORF1b:P314L|ORF3a:G224C|S:D614G|S:I670L	20B	0.14.4	B.1.1	pangolin 3.1.3; PANGO-v1.2.13
3	NORW-EB28D_CoronaHiT-Illumina	ERR4970124	1519043	21-151	33.6883	6938.32	1495.35	0.21552	22	24	Uneven pairs: R1=1519043, R2=1486066	29823	23	5190.72	99.66		N:R203K|N:G204R|ORF1b:P314L|ORF3a:G224C|S:D614G|S:I670L	20B	0.14.4	B.1.1	pangolin 3.1.3; PANGO-v1.2.13
3	NORW-EB28D_CoronaHiT-ONT	ERR4969006	190126	191-600	20.2562	1383.72	706.533	0.510606	83	86		29903	179	377.269	99.4		N:R203K|N:G204R|ORF1b:P314L|ORF3a:G224C|S:D614G|S:I670L	20B	0.14.4	B.1.1	pangolin 3.1.3; PUSHER-v1.2.13
3	NORW-EB29C_ARTIC_LoCost	ERR4969119	94833	400-700	19.4804	1198.96	434.902	0.362732	67	67		29903	121	436.623	99.6		N:R203K|N:G204R|ORF1a:G519S|ORF1b:P314L|S:D614G	20B	0.14.4	B.1.1	pangolin 3.1.3; PANGO-v1.2.13
3	NORW-EB29C_CoronaHiT-Illumina	ERR4970113	883603	21-151	33.6978	5959.9	1841.83	0.309037	8	20	Uneven pairs: R1=883603, R2=861604	29834	7	2935.54	99.75		N:R203K|N:G204R|ORF1a:G519S|ORF1b:P314L|S:D614G	20B	0.14.4	B.1.1	pangolin 3.1.3; PANGO-v1.2.13
3	NORW-EB29C_CoronaHiT-ONT	ERR4969030	181775	199-600	20.3924	1283.75	646.087	0.503281	83	120		29903	339	374.516	98.87		N:R203K|N:G204R|ORF1a:G519S|ORF1b:P314L|S:D614G	20B	0.14.4	B.1.1.283	pangolin 3.1.3; PUSHER-v1.2.13
3	NORW-EB2AB_ARTIC_LoCost	ERR4969124	92545	400-700	20.3239	1168.06	447.332	0.382971	306	306		29903	409	429.176	98.63		N:R203K|N:G204R|ORF1a:F1190L|ORF1a:L3123F|ORF1a:H3580Y|ORF1b:P314L|ORF8:F16V|S:D614G	20B	0.14.4	B.1.1	pangolin 3.1.3; PUSHER-v1.2.13
3	NORW-EB2AB_CoronaHiT-Illumina	ERR4970099	591322	21-151	33.6677	4719.46	1915.53	0.40588	163	183	Uneven pairs: R1=591322, R2=577127	29862	220	1949.84	99.13		N:R203K|N:G204R|ORF1a:F1190L|ORF1a:L3123F|ORF1a:H3580Y|ORF1b:P314L|ORF8:F16V|S:D614G	20B	0.14.4	B.1.1	pangolin 3.1.3; PUSHER-v1.2.13
3	NORW-EB2AB_CoronaHiT-ONT	ERR4969031	185916	208-600	20.3174	1331.21	690.144	0.518435	331	337		29903	409	374.999	98.63		N:R203K|N:G204R|ORF1a:F1190L|ORF1a:L3123F|ORF1a:H3580Y|ORF1b:P314L|ORF8:F16V|S:D614G	20B	0.14.4	B.1.1	pangolin 3.1.3; PUSHER-v1.2.13
3	NORW-EB2F6_ARTIC_LoCost	ERR4969123	95006	400-690	19.9943	1201.59	432.66	0.360071	67	67		29903	121	436.528	99.6		N:R203K|N:G204R|ORF1a:A3454V|ORF1b:P314L|ORF8:V62L|S:D614G	20B	0.14.4	B.1.1	pangolin 3.1.3; PANGO-v1.2.13
3	NORW-EB2F6_CoronaHiT-Illumina	ERR4970103	592149	21-151	33.7171	4710.87	1901.75	0.403694	25	35	Uneven pairs: R1=592149, R2=582060	29865	53	2009.21	99.7		N:R203K|N:G204R|ORF1a:A3454V|ORF1b:P314L|ORF8:V62L|S:D614G	20B	0.14.4	B.1.1	pangolin 3.1.3; PANGO-v1.2.13
3	NORW-EB2F6_CoronaHiT-ONT	ERR4968991	156968	201-600	20.3437	1070.63	570.361	0.532732	83	88		29903	136	366.676	99.55		N:R203K|N:G204R|ORF1a:A3454V|ORF1b:P314L|ORF8:V62L|S:D614G	20B	0.14.4	B.1.1	pangolin 3.1.3; PUSHER-v1.2.13
3	NORW-EB311_ARTIC_LoCost	ERR4969077	46783	400-700	19.2752	585.181	395.167	0.67529	532	703		29903	685	327.488	97.71		N:R203K|N:G204R|ORF1b:P314L|ORF1b:H604Y|ORF3a:G224C|S:D614G	20B	0.14.4	B.1.1	pangolin 3.1.3; PUSHER-v1.2.13
3	NORW-EB311_CoronaHiT-Illumina	ERR4970084	328134	22-151	33.6533	2666.02	2236.18	0.838771	261	505	Uneven pairs: R1=328134, R2=320566	29828	536	1077.57	97.96		N:R203K|N:G204R|ORF1b:P314L|ORF1b:H604Y|ORF3a:G224C|S:D614G	20B	0.14.4	B.1.1	pangolin 3.1.3; PUSHER-v1.2.13
3	NORW-EB311_CoronaHiT-ONT	ERR4968960	112498	195-600	20.1196	749.935	661.767	0.882432	732	1036		29903	1599	256.516	94.65		N:R203K|N:G204R|ORF1b:P314L|ORF1b:H604Y|ORF3a:G224C|S:D614G	20B	0.14.4	B.1.1	pangolin 3.1.3; PUSHER-v1.2.13
3	NORW-EB320_ARTIC_LoCost	ERR4969074	91835	400-696	20.1406	1158.08	448.116	0.386946	67	67		29902	121	430.153	99.59		N:R203K|N:G204R|ORF1a:R1566M|ORF1b:P314L|S:F58X|S:A163V|S:D614G	20B	0.14.4	B.1.1	pangolin 3.1.3; PUSHER-v1.2.13
3	NORW-EB320_CoronaHiT-Illumina	ERR4970110	784329	21-151	33.7181	5610.15	2019.9	0.360043	18	48	Uneven pairs: R1=784329, R2=770475	29867	69	2682.67	99.65		N:R203K|N:G204R|ORF1a:R1566M|ORF1b:P314L|S:A163V|S:D614G	20B	0.14.4	B.1.1	pangolin 3.1.3; PANGO-v1.2.13
3	NORW-EB320_CoronaHiT-ONT	ERR4968974	119192	198-600	20.0495	823.374	442.379	0.537275	187	281		29902	416	347.056	98.61		N:R203K|N:G204R|ORF1a:R1566M|ORF1b:P314L|S:F58X|S:A163V|S:D614G	20B	0.14.4	B.1.1	pangolin 3.1.3; PUSHER-v1.2.13
3	NORW-EB33F_ARTIC_LoCost	ERR4969106	93713	401-699	19.4231	1182.04	439.523	0.371834	67	67		29903	121	435.052	99.6		N:R203K|N:G204R|ORF1b:P314L|ORF3a:G224C|S:D614G|S:I670L	20B	0.14.4	B.1.1	pangolin 3.1.3; PUSHER-v1.2.13
3	NORW-EB33F_CoronaHiT-Illumina	ERR4970109	785052	21-151	33.7354	5550.1	1965.24	0.354091	42	48	Uneven pairs: R1=785052, R2=756752	29803	6	2377.77	99.64		N:R203K|N:G204R|ORF1b:P314L|ORF3a:G224C|S:D614G|S:I670L	20B	0.14.4	B.1.1	pangolin 3.1.3; PANGO-v1.2.13
3	NORW-EB33F_CoronaHiT-ONT	ERR4968983	116560	193-600	20.1778	846.897	430.156	0.50792	92	270		29903	339	356.563	98.87		N:R203K|N:G204R|ORF1b:P314L|ORF3a:G224C|S:D614G|S:I670L	20B	0.14.4	B.1.1	pangolin 3.1.3; PUSHER-v1.2.13
3	NORW-EB34E_ARTIC_LoCost	ERR4969073	81389	400-700	19.8788	1022.32	452.289	0.442415	67	67		29903	121	414.098	99.6		N:R203K|N:G204R|ORF1a:R398C|ORF1b:P314L|S:S477N|S:D614G	20B	0.14.4	B.1.1	pangolin 3.1.3; PANGO-v1.2.13
3	NORW-EB34E_CoronaHiT-Illumina	ERR4970117	842501	21-151	33.6796	5462.61	2233.92	0.408947	10	47	Uneven pairs: R1=842501, R2=826007	29836	38	2849.67	99.65		N:R203K|N:G204R|ORF1a:R398C|ORF1b:P314L|S:S477N|S:D614G	20B	0.14.4	B.1.1	pangolin 3.1.3; PANGO-v1.2.13
3	NORW-EB34E_CoronaHiT-ONT	ERR4969015	162114	199-600	20.8624	1160.62	695.892	0.599587	84	478		29903	606	352.365	97.97		N:R203K|N:G204R|ORF1a:R398C|ORF1b:P314L|S:D614G	20B	0.14.4	B.1.1	pangolin 3.1.3; PUSHER-v1.2.13
3	NORW-EB36C_ARTIC_LoCost	ERR4969099	14083	402-698	19.3672	176.369	186.781	1.05904	3546	5063		29903	6159	145.25	79.4		N:R203K|N:G204R|ORF1b:P314L|S:D614G	20B	0.14.4	B.1.1	pangolin 3.1.3; PUSHER-v1.2.13
3	NORW-EB36C_CoronaHiT-Illumina	ERR4970101	452564	22-151	33.7137	3173.86	2683.06	0.845361	471	699	Uneven pairs: R1=452564, R2=442348	29816	964	1497.88	96.48		N:R203K|N:G204R|ORF1b:P314L|S:D614G	20B	0.14.4	B.1.1	pangolin 3.1.3; PUSHER-v1.2.13
3	NORW-EB36C_CoronaHiT-ONT	ERR4968981	126991	203-598	20.6629	854.901	875.351	1.02392	1451	1934		29903	2825	244.982	90.55		N:R203K|N:G204R|ORF1b:P314L|S:D614G	20B	0.14.4	B.1.1	pangolin 3.1.3; PUSHER-v1.2.13
3	NORW-EB37B_ARTIC_LoCost	ERR4969098	92011	400-696	20.0866	1159.37	439.41	0.379009	67	67		29903	121	432.707	99.6		ORF1b:P314L|ORF1b:R1687C|ORF1b:S1985L|ORF3a:V13L|ORF3a:T175I|S:D614G	20A	0.14.4	B.1	pangolin 3.1.3; PANGO-v1.2.13
3	NORW-EB37B_CoronaHiT-Illumina	ERR4970125	1498661	20-151	33.6688	6527.29	1891.51	0.289786	45	47	Uneven pairs: R1=1498661, R2=1472026	29806	8	5121.61	99.65		ORF1b:P314L|ORF1b:R1687C|ORF1b:S1985L|ORF3a:V13L|ORF3a:T175I|S:D614G	20A	0.14.4	B.1	pangolin 3.1.3; PANGO-v1.2.13
3	NORW-EB37B_CoronaHiT-ONT	ERR4969004	165760	203-600	20.3978	1166	679.708	0.582939	86	267		29903	395	351.946	98.68		ORF1b:P314L|ORF1b:R1687C|ORF1b:S1985L|ORF3a:V13L|ORF3a:T175I|S:D614G	20A	0.14.4	B.1	pangolin 3.1.3; PUSHER-v1.2.13
3	NORW-EB3D5_ARTIC_LoCost	ERR4969122	95498	401-698	19.7985	1206.81	430.756	0.356938	67	67		29903	121	437.966	99.6		N:D81Y|ORF1a:G519S|ORF1b:P314L|ORF9b:Q77H|S:D614G	20A	0.14.4	B.1.105	pangolin 3.1.3; PUSHER-v1.2.13
3	NORW-EB3D5_CoronaHiT-Illumina	ERR4970127	1816099	20-151	33.7076	6980.88	1586.45	0.227256	39	47	Uneven pairs: R1=1816099, R2=1779586	29806	9	6378.84	99.65		N:D81Y|ORF1a:G519S|ORF1b:P314L|ORF9b:Q77H|S:D614G	20A	0.14.4	B.1.105	pangolin 3.1.3; PUSHER-v1.2.13
3	NORW-EB3D5_CoronaHiT-ONT	ERR4968957	188992	205-600	20.7121	1341.99	721.069	0.537312	83	263		29903	339	365.558	98.87		N:D81Y|ORF1a:G519S|ORF1b:P314L|ORF9b:Q77H|S:D614G	20A	0.14.4	B.1.105	pangolin 3.1.3; PUSHER-v1.2.13
3	NORW-EB43C_ARTIC_LoCost	ERR4969063	47037	400-699	19.8735	589.083	430.328	0.730504	566	737		29903	932	312.956	96.88		N:R203K|N:G204R|ORF1a:G2035R|ORF1b:P314L|ORF7a:T14A|S:D614G	20B	0.14.4	B.1.1	pangolin 3.1.3; PUSHER-v1.2.13
3	NORW-EB43C_CoronaHiT-Illumina	ERR4970112	565707	21-151	33.6651	3802.34	2647.43	0.696263	46	144	Uneven pairs: R1=565707, R2=554575	29798	262	1894.69	98.77		N:R203K|N:G204R|ORF1a:G2035R|ORF1b:P314L|ORF7a:T14A|S:D614G|S:S704L	20B	0.14.4	B.1.1	pangolin 3.1.3; PUSHER-v1.2.13
3	NORW-EB43C_CoronaHiT-ONT	ERR4969011	155726	201-600	20.0149	1057.51	989.033	0.935246	565	1256		29903	1725	286.432	94.23		N:R203K|N:G204R|ORF1a:G2035R|ORF1b:P314L|ORF7a:T14A|S:D614G	20B	0.14.4	B.1.1	pangolin 3.1.3; PUSHER-v1.2.13
3	NORW-EBEC5_ARTIC_LoCost	ERR4969062	22139	405-698	19.9363	275.841	279.497	1.01326	2204	3561		29902	4218	188.734	85.89		N:R203K|N:G204R|ORF1a:S2535L|ORF1b:P314L|ORF1b:T2507X|S:D614G	20B	0.14.4	B.1.1	pangolin 3.1.3; PUSHER-v1.2.13
3	NORW-EBEC5_CoronaHiT-Illumina	ERR4970086	281076	24-151	33.6218	2301.81	2348.73	1.02038	247	471	Uneven pairs: R1=281076, R2=276422	29797	1000	945.8	96.29		N:R203K|N:G204R|ORF1a:S2535L|ORF1b:P314L|ORF1b:T2507X|S:D614G	20B	0.14.4	B.1.1	pangolin 3.1.3; PUSHER-v1.2.13
3	NORW-EBEC5_CoronaHiT-ONT	ERR4968955	99504	207-600	20.8094	695.158	783.231	1.1267	1098	2422		29902	4003	218.01	86.61		N:R203K|N:G204R|ORF1a:S2535L|ORF1b:P314L|ORF1b:T2507X|S:D614G	20B	0.14.4	B.1	pangolin 3.1.3; PUSHER-v1.2.13
3	NORW-EC35C_ARTIC_LoCost	ERR4969078	74527	401-696	19.6208	933.891	442.172	0.473473	67	234		29903	339	411.505	98.87		N:R203K|N:G204R|ORF1a:Q3777R|ORF1b:P314L|S:S477N|S:D614G	20B	0.14.4	B.1.1	pangolin 3.1.3; PUSHER-v1.2.13
3	NORW-EC35C_CoronaHiT-Illumina	ERR4970098	529442	21-151	33.6997	4363.98	1969.63	0.451339	49	50	Uneven pairs: R1=529442, R2=520054	29806	9	1784.2	99.65		N:R203K|N:G204R|ORF1a:Q3777R|ORF1b:P314L|S:S477N|S:D614G	20B	0.14.4	B.1.1	pangolin 3.1.3; PANGO-v1.2.13
3	NORW-EC35C_CoronaHiT-ONT	ERR4968967	114438	211-600	20.3495	796.72	418.561	0.525355	86	249		29903	420	344.876	98.6		N:R203K|N:G204R|ORF1a:Q3777R|ORF1b:P314L|S:S477N|S:D614G	20B	0.14.4	B.1.1	pangolin 3.1.3; PUSHER-v1.2.13
3	NORW-EC389_ARTIC_LoCost	ERR4969130	96957	401-700	19.692	1223.31	419.335	0.342787	67	67		29903	121	440.3	99.6		N:R203K|N:G204R|ORF1b:P314L|S:D614G	20B	0.14.4	B.1.1	pangolin 3.1.3; PANGO-v1.2.13
3	NORW-EC389_CoronaHiT-Illumina	ERR4970080	273651	21-151	33.6837	2436.98	1371.44	0.562762	21	26	Uneven pairs: R1=273651, R2=268798	29832	8	912.593	99.74		N:R203K|N:G204R|ORF1b:P314L|S:D614G	20B	0.14.4	B.1.1	pangolin 3.1.3; PANGO-v1.2.13
3	NORW-EC389_CoronaHiT-ONT	ERR4969014	191262	203-600	20.4655	1372.52	709.948	0.517257	83	85		29903	121	381.027	99.6		N:R203K|N:G204R|ORF1b:P314L|S:D614G	20B	0.14.4	B.1.1	pangolin 3.1.3; PANGO-v1.2.13
3	NORW-EC3E3_ARTIC_LoCost	ERR4969108	73920	401-700	19.7011	927.612	445.179	0.47992	300	301		29891	398	405.816	98.63	S:L141-|S:G142-|S:V143-|S:Y144-	N:R203K|N:G204R|ORF1b:P314L|ORF8:V62L|S:D614G	20B	0.14.4	B.1.1	pangolin 3.1.3; PUSHER-v1.2.13
3	NORW-EC3E3_CoronaHiT-Illumina	ERR4970089	401554	22-151	33.6896	3386.75	1998.16	0.589995	298	317	Uneven pairs: R1=401554, R2=395149	29819	328	1365.23	98.62	S:L141-|S:G142-|S:V143-|S:Y144-	N:R203K|N:G204R|ORF1b:P314L|ORF8:V62L|S:D614G	20B	0.14.4	B.1.1	pangolin 3.1.3; PUSHER-v1.2.13
3	NORW-EC3E3_CoronaHiT-ONT	ERR4968993	141283	196-600	20.269	980.37	587.246	0.599004	329	358		29891	759	336.535	97.42	S:L141-|S:G142-|S:V143-|S:Y144-	N:R203K|N:G204R|ORF1b:P314L|ORF8:V62L|S:D614G	20B	0.14.4	B.1.1	pangolin 3.1.3; PUSHER-v1.2.13
3	NORW-EC40E_ARTIC_LoCost	ERR4969113	95820	402-700	20.0385	1211.06	426.235	0.351953	50	67		29903	121	439.124	99.6		ORF1a:T4217I|ORF1b:P314L|S:D614G	20A	0.14.4	B.1.225	pangolin 3.1.3; PANGO-v1.2.13
3	NORW-EC40E_CoronaHiT-Illumina	ERR4970081	218170	22-151	33.6548	1956.99	1140.36	0.582709	23	33	Uneven pairs: R1=218170, R2=215334	29836	39	729.417	99.65		ORF1a:T4217I|ORF1b:P314L|S:D614G	20A	0.14.4	B.1.225	pangolin 3.1.3; PANGO-v1.2.13
3	NORW-EC40E_CoronaHiT-ONT	ERR4969028	188415	201-600	20.6943	1347	647.147	0.480437	83	86		29903	121	383.661	99.6		ORF1a:T4217I|ORF1b:P314L|S:D614G	20A	0.14.4	B.1.225	pangolin 3.1.3; PANGO-v1.2.13
3	NORW-EC41D_ARTIC_LoCost	ERR4969091	68764	400-699	19.621	861.337	433.951	0.503811	67	68		29903	121	402.09	99.6		N:R203K|N:G204R|ORF1b:P314L|S:P9S|S:D614G	20B	0.14.4	B.1.1	pangolin 3.1.3; PANGO-v1.2.13
3	NORW-EC41D_CoronaHiT-Illumina	ERR4970079	275766	21-151	33.7126	2440.98	1477.56	0.605314	50	54	Uneven pairs: R1=275766, R2=270831	29798	31	940.412	99.55		N:R203K|N:G204R|ORF1b:P314L|S:P9S|S:D614G	20B	0.14.4	B.1.1	pangolin 3.1.3; PUSHER-v1.2.13
3	NORW-EC41D_CoronaHiT-ONT	ERR4969007	110292	198-600	20.5405	772.745	434.438	0.562201	215	307		29903	677	329.787	97.74		N:R203K|N:G204R|ORF1b:P314L|S:P9S|S:D614G	20B	0.14.4	B.1.1	pangolin 3.1.3; PUSHER-v1.2.13
3	NORW-EC42C_ARTIC_LoCost	ERR4969064	62935	401-698	20.1404	788.63	438.937	0.556582	67	68		29903	121	377.565	99.6		N:R203K|N:G204R|ORF1a:G392C|ORF1b:P314L|ORF1b:P2313S|ORF3a:G172C|ORF8:G96C|S:D614G	20B	0.14.4	B.1.1	pangolin 3.1.3; PUSHER-v1.2.13
3	NORW-EC42C_CoronaHiT-Illumina	ERR4970082	267231	23-151	33.708	2301.64	1682.11	0.73083	48	112	Uneven pairs: R1=267231, R2=262582	29806	125	908.517	99.26		N:R203K|N:G204R|ORF1a:G392C|ORF1b:P314L|ORF1b:P2313S|ORF3a:G172C|ORF8:G96C|S:D614G	20B	0.14.4	B.1.1	pangolin 3.1.3; PUSHER-v1.2.13
3	NORW-EC42C_CoronaHiT-ONT	ERR4968976	127742	202-600	20.1421	879.31	609.557	0.693222	190	501		29903	624	309.721	97.91		N:R203K|N:G204R|ORF1a:G392C|ORF1b:P314L|ORF1b:P2313S|ORF3a:G172C|ORF8:G96C|S:D614G	20B	0.14.4	B.1.1	pangolin 3.1.3; PUSHER-v1.2.13
3	NORW-EC44A_ARTIC_LoCost	ERR4969105	9265	407-700	19.3494	115.7	133.858	1.15694	5345	8096		29899	9349	99.4196	68.72	ORF1a:I222-	E:L73X|ORF1b:P314L|ORF1b:M454I|S:D614G	20A	0.14.4	B.1	pangolin 3.1.3; PUSHER-v1.2.13
3	NORW-EC44A_CoronaHiT-Illumina	ERR4970085	338983	21-151	33.6538	2357.04	2493.33	1.05782	1222	1520	Uneven pairs: R1=338983, R2=332453	29502	1862	1133.08	92.42	ORF1a:I222-	E:L73X|ORF1a:A2355S|ORF1a:A2557X|ORF1a:T4217I|ORF1b:P314L|ORF1b:M454I|S:D614G|S:R765L	20A	0.14.4	B.1.225	pangolin 3.1.3; PUSHER-v1.2.13
3	NORW-EC44A_CoronaHiT-ONT	ERR4969018	122960	202-600	20.4046	845.218	1081.44	1.27948	1931	3091		29899	4241	212.58	85.8	ORF1a:I222-	E:L73X|ORF1a:T4217I|ORF1b:P314L|ORF1b:M454I|S:D614G	20A	0.14.4	B.1.225	pangolin 3.1.3; PUSHER-v1.2.13
3	NORW-EC4A4_ARTIC_LoCost	ERR4969121	96115	400-700	19.8031	1213.15	425.239	0.350525	67	67		29903	121	438.838	99.6		ORF1a:T265I|ORF1a:L3123F|ORF1a:A3615V|ORF1a:S3884L|ORF1b:P314L|ORF3a:Q57H|S:D614G|S:S1170T	20C	0.14.4	B.1	pangolin 3.1.3; PANGO-v1.2.13
3	NORW-EC4A4_CoronaHiT-Illumina	ERR4970067	111701	23-151	33.6354	1009.12	613.651	0.608105	84	85	Uneven pairs: R1=111701, R2=109967	29820	204	371.479	99.04		ORF1a:T265I|ORF1a:L3123F|ORF1a:A3615V|ORF1a:S3884L|ORF1b:P314L|ORF3a:Q57H|S:D614G|S:S1170T	20C	0.14.4	B.1	pangolin 3.1.3; PUSHER-v1.2.13
3	NORW-EC4A4_CoronaHiT-ONT	ERR4969013	196061	185-600	20.3204	1438.99	716.61	0.497995	83	84		29903	122	381.705	99.59		ORF1a:T265I|ORF1a:L3123F|ORF1a:A3615V|ORF1a:S3884L|ORF1b:P314L|ORF3a:Q57H|S:D614G|S:S1170T	20C	0.14.4	B.1	pangolin 3.1.3; PUSHER-v1.2.13
3	NORW-EC4C2_ARTIC_LoCost	ERR4969131	95984	400-700	19.493	1214.52	429.723	0.353822	63	67		29903	121	439.454	99.6		ORF1a:T265I|ORF1a:L3123F|ORF1a:A3615V|ORF1a:S3884L|ORF1b:P314L|ORF1b:K1383R|ORF3a:Q57H|S:D614G	20C	0.14.4	B.1	pangolin 3.1.3; PANGO-v1.2.13
3	NORW-EC4C2_CoronaHiT-Illumina	ERR4970093	342282	21-151	33.6456	3007.39	1560.61	0.518923	26	37	Uneven pairs: R1=342282, R2=336869	29833	20	1148.58	99.7		ORF1a:T265I|ORF1a:L3123F|ORF1a:A3615V|ORF1a:S3884L|ORF1b:P314L|ORF1b:K1383R|ORF3a:Q57H|S:D614G	20C	0.14.4	B.1	pangolin 3.1.3; PANGO-v1.2.13
3	NORW-EC4C2_CoronaHiT-ONT	ERR4969016	162786	203-600	20.7734	1154.59	645.584	0.559148	82	86		29903	121	376.813	99.6		ORF1a:T265I|ORF1a:L3123F|ORF1a:A3615V|ORF1a:S3884L|ORF1b:P314L|ORF1b:K1383R|ORF3a:Q57H|S:D614G	20C	0.14.4	B.1	pangolin 3.1.3; PANGO-v1.2.13
3	NORW-EC4D1_ARTIC_LoCost	ERR4969125	94381	400-694	19.7746	1192.24	428.6	0.359491	67	67		29903	121	438.474	99.6		N:R203K|N:G204R|ORF1b:P314L|S:S477N|S:D614G	20B	0.14.4	B.1.1	pangolin 3.1.3; PANGO-v1.2.13
3	NORW-EC4D1_CoronaHiT-Illumina	ERR4970116	1165606	20-151	33.6741	6485.38	1789.36	0.275907	25	28	Uneven pairs: R1=1165606, R2=1146053	29859	61	3968.13	99.65		N:R203K|N:G204R|ORF1b:P314L|S:S477N|S:D614G	20B	0.14.4	B.1.1	pangolin 3.1.3; PANGO-v1.2.13
3	NORW-EC4D1_CoronaHiT-ONT	ERR4969023	214587	197-600	20.7103	1532.06	849.498	0.55448	83	86		29903	136	370.274	99.55		N:R203K|N:G204R|ORF1b:P314L|S:S477N|S:D614G	20B	0.14.4	B.1.1	pangolin 3.1.3; PUSHER-v1.2.13
3	NORW-EC4E0_ARTIC_LoCost	ERR4969127	96364	402-694	20.2785	1218.85	428.02	0.351168	67	67		29903	122	438.614	99.59		N:R203K|N:G204R|ORF1a:A3454V|ORF1b:P314L|ORF1b:I1539T|ORF8:V62L|S:T307I|S:D614G	20B	0.14.4	B.1.1	pangolin 3.1.3; PUSHER-v1.2.13
3	NORW-EC4E0_CoronaHiT-Illumina	ERR4970119	1109049	21-151	33.711	6422.39	1776.51	0.276612	38	48	Uneven pairs: R1=1109049, R2=1088666	29846	48	3806.26	99.65		N:R203K|N:G204R|ORF1a:A3454V|ORF1b:P314L|ORF1b:I1539T|ORF8:V62L|S:T307I|S:D614G	20B	0.14.4	B.1.1	pangolin 3.1.3; PUSHER-v1.2.13
3	NORW-EC4E0_CoronaHiT-ONT	ERR4969009	194718	187-600	20.4782	1373.03	685.876	0.499535	89	267		29903	339	373.269	98.87		N:R203K|N:G204R|ORF1a:A3454V|ORF1b:P314L|ORF1b:I1539T|ORF8:V62L|S:D614G	20B	0.14.4	B.1.1	pangolin 3.1.3; PUSHER-v1.2.13
3	NORW-EC4FF_ARTIC_LoCost	ERR4969129	97293	401-699	20.1521	1229.92	420.821	0.342154	64	67		29903	121	440.138	99.6		N:R203K|N:G204R|ORF1b:P314L|S:D614G	20B	0.14.4	B.1.1	pangolin 3.1.3; PANGO-v1.2.13
3	NORW-EC4FF_CoronaHiT-Illumina	ERR4970111	712398	21-151	33.6207	5316.87	1859.94	0.349818	10	12	Uneven pairs: R1=712398, R2=701384	29835	1	2357.46	99.77		N:R203K|N:G204R|ORF1b:P314L|S:D614G	20B	0.14.4	B.1.1	pangolin 3.1.3; PANGO-v1.2.13
3	NORW-EC4FF_CoronaHiT-ONT	ERR4969021	234191	202-600	20.478	1694.7	851.695	0.502564	51	66		29903	121	383.355	99.6		N:R203K|N:G204R|ORF1b:P314L|S:D614G	20B	0.14.4	B.1.1	pangolin 3.1.3; PANGO-v1.2.13
3	NORW-EC50B_ARTIC_LoCost	ERR4969061	8099	400-696	19.5774	101.174	117.498	1.16134	5464	7759		29903	9010	88.7876	69.87		N:S188L|ORF1b:T132I|ORF1b:P314L|S:D614G	20A	0.14.4	B.1.93	pangolin 3.1.3; PUSHER-v1.2.13
3	NORW-EC50B_CoronaHiT-Illumina	ERR4970115	949375	21-151	33.7011	4149.51	2953.86	0.711858	46	66	Uneven pairs: R1=949375, R2=931257	29806	97	3320.04	99.35		N:S188L|ORF1b:T132I|ORF1b:P314L|ORF1b:F1955L|S:D614G	20A	0.14.4	B.1.93	pangolin 3.1.3; PUSHER-v1.2.13
3	NORW-EC50B_CoronaHiT-ONT	ERR4968977	108936	198-600	19.9932	708.517	813	1.14747	1083	2345		29903	3700	210.982	87.63		N:S188L|ORF1b:T132I|ORF1b:P314L|ORF1b:F1955L|S:D614G	20A	0.14.4	B.1.93	pangolin 3.1.3; PUSHER-v1.2.13
3	NORW-EC529_ARTIC_LoCost	ERR4969084	92723	401-692	19.776	1171.38	444.676	0.379619	67	67		29900	121	431.016	99.59	S:Y144-	N:R203K|N:G204R|ORF1a:P1213L|ORF1b:P314L|ORF7b:C41F|ORF8:A65S|S:D614G	20B	0.14.4	B.1.1	pangolin 3.1.3; PANGO-v1.2.13
3	NORW-EC529_CoronaHiT-Illumina	ERR4970071	384117	22-151	33.6513	3330.76	1691.54	0.507856	48	50	Uneven pairs: R1=384117, R2=377294	29801	22	1279.67	99.59	S:Y144-	N:R203K|N:G204R|ORF1a:P1213L|ORF1b:P314L|ORF7b:C41F|ORF8:A65S|S:D614G	20B	0.14.4	B.1.1	pangolin 3.1.3; PUSHER-v1.2.13
3	NORW-EC529_CoronaHiT-ONT	ERR4968968	85791	209-600	19.9608	583.679	298.609	0.511599	229	273		29900	463	307.163	98.44	S:Y144-	N:R203K|N:G204R|ORF1b:P314L|ORF7b:C41F|ORF8:A65S|S:D614G	20B	0.14.4	B.1.1	pangolin 3.1.3; PUSHER-v1.2.13
3	NORW-EC538_ARTIC_LoCost	ERR4969114	88532	400-699	19.9386	1114.07	447.58	0.401753	67	67		29903	121	426.309	99.6		ORF1b:P314L|ORF1b:R1687C|ORF1b:S1985L|ORF3a:V13L|ORF3a:T175I|S:D614G	20A	0.14.4	B.1	pangolin 3.1.3; PANGO-v1.2.13
3	NORW-EC538_CoronaHiT-Illumina	ERR4969171	695277	21-151	33.6685	5072.94	2261.42	0.44578	47	49	Uneven pairs: R1=695277, R2=681346	29806	9	2363.2	99.65		ORF1b:P314L|ORF1b:R1687C|ORF1b:S1985L|ORF3a:V13L|ORF3a:T175I|S:D614G	20A	0.14.4	B.1	pangolin 3.1.3; PANGO-v1.2.13
3	NORW-EC538_CoronaHiT-ONT	ERR4969012	180530	200-600	20.6392	1281.45	743.93	0.580538	83	90		29903	339	358.461	98.87		ORF1b:P314L|ORF1b:R1687C|ORF1b:S1985L|ORF3a:V13L|ORF3a:T175I|S:D614G	20A	0.14.4	B.1	pangolin 3.1.3; PUSHER-v1.2.13
3	NORW-EC556_ARTIC_LoCost	ERR4969116	97228	400-700	20.2711	1228.68	419.999	0.341829	39	41		29903	121	441.16	99.6		ORF1a:P2110S|ORF1a:T4217I|ORF1b:P314L|ORF1b:M454I|S:D614G	20A	0.14.4	B.1	pangolin 3.1.3; PANGO-v1.2.13
3	NORW-EC556_CoronaHiT-Illumina	ERR4969168	448016	21-151	33.6703	3735.4	1769.18	0.473626	13	17	Uneven pairs: R1=448016, R2=439970	29864	32	1503.33	99.76		ORF1a:P2110S|ORF1a:T4217I|ORF1b:P314L|ORF1b:M454I|S:D614G	20A	0.14.4	B.1	pangolin 3.1.3; PANGO-v1.2.13
3	NORW-EC556_CoronaHiT-ONT	ERR4968996	181762	205-600	20.6372	1332.47	707.702	0.531121	64	84		29903	121	383.117	99.6		ORF1a:P2110S|ORF1a:T4217I|ORF1b:P314L|ORF1b:M454I|S:D614G	20A	0.14.4	B.1	pangolin 3.1.3; PANGO-v1.2.13
3	NORW-EC592_ARTIC_LoCost	ERR4969083	95592	400-697	20.3166	1208.32	430.115	0.355962	45	67		29903	121	437.83	99.6		ORF1a:T4217I|ORF1b:P314L|S:D614G	20A	0.14.4	B.1.225	pangolin 3.1.3; PANGO-v1.2.13
3	NORW-EC592_CoronaHiT-Illumina	ERR4970096	564162	22-151	33.6896	4563.02	1873.57	0.4106	12	16	Uneven pairs: R1=564162, R2=553984	29835	7	1902.55	99.75		ORF1a:T4217I|ORF1b:P314L|S:D614G	20A	0.14.4	B.1.225	pangolin 3.1.3; PANGO-v1.2.13
3	NORW-EC592_CoronaHiT-ONT	ERR4968959	212431	197-600	20.3498	1539.13	756.112	0.491259	56	105		29903	339	379.136	98.87		ORF1a:T4217I|ORF1b:P314L|S:D614G	20A	0.14.4	B.1.225	pangolin 3.1.3; PUSHER-v1.2.13
3	NORW-EC5A1_ARTIC_LoCost	ERR4969126	95573	400-696	20.4139	1208.69	428.951	0.354889	67	67		29903	121	438.614	99.6		ORF1a:T4217I|ORF1b:P314L|S:D614G	20A	0.14.4	B.1.225	pangolin 3.1.3; PANGO-v1.2.13
3	NORW-EC5A1_CoronaHiT-Illumina	ERR4970114	959285	21-151	33.6814	6224.72	1676.46	0.269322	23	37	Uneven pairs: R1=959285, R2=943638	29834	11	3296.79	99.73		ORF1a:T4217I|ORF1b:P314L|S:D614G	20A	0.14.4	B.1.225	pangolin 3.1.3; PANGO-v1.2.13
3	NORW-EC5A1_CoronaHiT-ONT	ERR4969024	220431	199-600	20.5969	1570.38	739.61	0.470975	83	84		29903	136	384.027	99.55		ORF1a:T4217I|ORF1b:P314L|S:D614G	20A	0.14.4	B.1.225	pangolin 3.1.3; PUSHER-v1.2.13
3	NORW-EC5B0_ARTIC_LoCost	ERR4969059	10937	408-698	19.2701	136.801	143.649	1.05006	3588	5836		29903	6741	119.596	77.46		N:R203K|N:G204R|N:T271I|N:T325I|ORF1b:P314L|ORF1b:P2116S|S:D614G	20B	0.14.4	B.1.1	pangolin 3.1.3; PUSHER-v1.2.13
3	NORW-EC5B0_CoronaHiT-Illumina	ERR4970121	966391	21-151	33.6948	4298.29	2934.78	0.682777	472	503	Uneven pairs: R1=966391, R2=949981	29800	518	3337.37	97.92		N:R203K|N:G204R|N:T271I|N:T325I|ORF1a:L4037F|ORF1b:P314L|ORF1b:P2116S|S:D614G	20B	0.14.4	B.1.1	pangolin 3.1.3; PUSHER-v1.2.13
3	NORW-EC5B0_CoronaHiT-ONT	ERR4968988	108169	194-599	20.1154	737.238	826.645	1.12127	1498	1898		29903	3278	216.522	89.04		N:R203K|N:G204R|N:T271I|N:T325I|ORF1a:L4037F|ORF1b:P314L|ORF1b:P2116S|S:D614G	20B	0.14.4	B.1.1	pangolin 3.1.3; PUSHER-v1.2.13
3	NORW-EC5CF_ARTIC_LoCost	ERR4969092	64116	400-700	20.194	804.446	456.707	0.567729	497	591		29903	716	371.849	97.61		N:R203K|N:G204R|ORF1a:V2862E|ORF1a:T3058I|ORF1b:P314L|S:D614G	20B	0.14.4	B.1.1	pangolin 3.1.3; PUSHER-v1.2.13
3	NORW-EC5CF_CoronaHiT-Illumina	ERR4970104	605293	20-151	33.6558	4244.08	2609.22	0.614792	473	479	Uneven pairs: R1=605293, R2=593553	29799	475	2018.12	98.06		N:R203K|N:G204R|ORF1a:V2862E|ORF1a:T3058I|ORF1b:P314L|ORF8:I121L|S:D614G	20B	0.14.4	B.1.1	pangolin 3.1.3; PUSHER-v1.2.13
3	NORW-EC5CF_CoronaHiT-ONT	ERR4969003	141485	204-600	19.6844	988.872	759.412	0.767958	534	932		29903	1646	302.488	94.5		N:R203K|N:G204R|ORF1a:T3058I|ORF1b:P314L|S:D614G	20B	0.14.4	B.1.1	pangolin 3.1.3; PUSHER-v1.2.13
3	NORW-EC5DE_ARTIC_LoCost	ERR4969089	20416	400-699	19.044	254.75	222.794	0.874562	1222	3551		29903	4191	200.152	85.98		N:R203K|N:G204R|ORF1b:P314L|S:D614G	20B	0.14.4	B.1.1	pangolin 3.1.3; PUSHER-v1.2.13
3	NORW-EC5DE_CoronaHiT-Illumina	ERR4970108	425777	20-151	33.6137	3134.34	2637.16	0.841377	155	269	Uneven pairs: R1=425777, R2=417205	29837	531	1392.99	98		N:R203K|N:G204R|ORF1b:P314L|S:S477N|S:D614G	20B	0.14.4	B.1.1	pangolin 3.1.3; PUSHER-v1.2.13
3	NORW-EC5DE_CoronaHiT-ONT	ERR4968995	69768	206-599	20.7458	435.977	429.913	0.98609	1848	3262		29903	5224	179.211	82.53		N:R203K|N:G204R|ORF1b:P314L|S:D614G	20B	0.14.4	B.1.1	pangolin 3.1.3; PUSHER-v1.2.13
3	NORW-EC5ED_ARTIC_LoCost	ERR4969069	71991	400-700	19.5125	903.478	436.314	0.482927	67	67		29903	121	406.361	99.6		N:R203K|N:G204R|ORF1a:R398C|ORF1b:P314L|S:S477N|S:D614G	20B	0.14.4	B.1.1	pangolin 3.1.3; PANGO-v1.2.13
3	NORW-EC5ED_CoronaHiT-Illumina	ERR4970120	860587	20-151	33.7165	5522.26	2267.4	0.410593	47	49	Uneven pairs: R1=860587, R2=847756	29836	38	2975.22	99.65		N:R203K|N:G204R|ORF1a:R398C|ORF1b:P314L|S:S477N|S:D614G	20B	0.14.4	B.1.1	pangolin 3.1.3; PANGO-v1.2.13
3	NORW-EC5ED_CoronaHiT-ONT	ERR4968992	33661	199-600	20.4112	256.428	154.089	0.600907	937	1365		29903	1784	171.26	94.03		N:R203K|N:G204R|ORF1a:R398C|ORF1b:P314L|S:D614G	20B	0.14.4	B.1.1	pangolin 3.1.3; PUSHER-v1.2.13
3	NORW-EC5FC_ARTIC_LoCost	ERR4969120	96563	400-696	19.8459	1222.09	425.878	0.348484	67	67		29903	121	439.436	99.6		ORF1a:S483Y|ORF1a:P892L|ORF1b:P314L|S:D614G	20A	0.14.4	B.1.201	pangolin 3.1.3; PANGO-v1.2.13
3	NORW-EC5FC_CoronaHiT-Illumina	ERR4970087	406619	23-151	33.6804	3495.55	1716.71	0.491113	40	51	Uneven pairs: R1=406619, R2=400055	29835	38	1393.02	99.65		ORF1a:S483Y|ORF1a:P892L|ORF1b:P314L|S:D614G	20A	0.14.4	B.1.201	pangolin 3.1.3; PANGO-v1.2.13
3	NORW-EC5FC_CoronaHiT-ONT	ERR4968984	137339	201-600	20.1167	949.022	480.527	0.506339	86	188		29903	339	360.98	98.87		ORF1a:S483Y|ORF1a:P892L|ORF1b:P314L|S:D614G	20A	0.14.4	B.1.201	pangolin 3.1.3; PUSHER-v1.2.13
3	NORW-EC608_ARTIC_LoCost	ERR4969118	95575	400-700	20.1118	1209.61	431.448	0.356682	67	70		29886	121	436.994	99.54	ORF7a:S60-|ORF7a:T61-|ORF7a:Q62-|ORF7a:F63-|ORF7a:A64-	ORF1b:P314L|ORF1b:L1449F|ORF1b:K2115E|ORF7a:F65X|S:D614G	20A	0.14.4	B.1	pangolin 3.1.3; PUSHER-v1.2.13
3	NORW-EC608_CoronaHiT-Illumina	ERR4970078	180407	24-151	33.6967	1598.37	961.007	0.601241	63	65	Uneven pairs: R1=180407, R2=178037	29817	43	607.495	99.57	ORF7a:S60-|ORF7a:T61-|ORF7a:Q62-|ORF7a:F63-|ORF7a:A64-	ORF1b:P314L|ORF1b:L1449F|ORF1b:K2115E|ORF7a:F65X|S:D614G	20A	0.14.4	B.1	pangolin 3.1.3; PUSHER-v1.2.13
3	NORW-EC608_CoronaHiT-ONT	ERR4968961	94703	203-597	20.7642	637.962	343.404	0.538283	93	283		29886	403	322.43	98.6	ORF7a:S60-|ORF7a:T61-|ORF7a:Q62-|ORF7a:F63-|ORF7a:A64-	ORF1b:P314L|ORF1b:L1449F|ORF1b:K2115E|ORF7a:F65X|S:D614G	20A	0.14.4	B.1	pangolin 3.1.3; PUSHER-v1.2.13
3	NORW-EC617_ARTIC_LoCost	ERR4969094	85735	400-700	19.7062	1079.18	452.718	0.419501	67	67		29903	121	424.234	99.6		N:R203K|N:G204R|ORF1b:P314L|S:D614G	20B	0.14.4	B.1.1	pangolin 3.1.3; PANGO-v1.2.13
3	NORW-EC617_CoronaHiT-Illumina	ERR4970129	1635949	21-151	33.7061	6632.05	1890.61	0.285071	48	49	Uneven pairs: R1=1635949, R2=1600926	29798	0	5720.93	99.65		N:R203K|N:G204R|ORF1b:P314L|S:D614G	20B	0.14.4	B.1.1	pangolin 3.1.3; PANGO-v1.2.13
3	NORW-EC617_CoronaHiT-ONT	ERR4968956	182625	189-600	20.4769	1318.65	792.084	0.600678	83	132		29903	339	356.107	98.87		N:R203K|N:G204R|ORF1b:P314L|S:D614G	20B	0.14.4	B	pangolin 3.1.3; PUSHER-v1.2.13
3	NORW-EC626_ARTIC_LoCost	ERR4969107	92311	400-695	20.1028	1164.96	438.691	0.376571	67	67		29903	121	433.24	99.6		N:R203K|N:G204R|ORF1b:P314L|ORF3a:G224C|ORF9b:E27G|S:D614G|S:I670L	20B	0.14.4	B.1.1	pangolin 3.1.3; PANGO-v1.2.13
3	NORW-EC626_CoronaHiT-Illumina	ERR4970105	740633	21-151	33.6574	5351.46	2054.23	0.383863	28	51	Uneven pairs: R1=740633, R2=729579	29819	21	2499.5	99.65		N:R203K|N:G204R|ORF1b:P314L|ORF3a:G224C|ORF9b:E27G|S:D614G|S:I670L	20B	0.14.4	B.1.1	pangolin 3.1.3; PANGO-v1.2.13
3	NORW-EC626_CoronaHiT-ONT	ERR4969034	242248	196-600	20.1424	1732.07	887.312	0.512285	82	238		29903	339	379.054	98.87		N:R203K|N:G204R|ORF1b:P314L|ORF3a:G224C|ORF9b:E27G|S:D614G|S:I670L	20B	0.14.4	B.1.1	pangolin 3.1.3; PUSHER-v1.2.13
3	NORW-EC644_ARTIC_LoCost	ERR4969097	14996	400-698	19.6032	187.022	205.273	1.09759	2540	5918		29903	7275	145.586	75.67		N:R203K|N:G204R|ORF1b:P314L|S:D614G	20B	0.14.4	B.1.1	pangolin 3.1.3; PUSHER-v1.2.13
3	NORW-EC644_CoronaHiT-Illumina	ERR4970118	1157449	21-151	33.6649	4563.02	2928.85	0.641867	40	48	Uneven pairs: R1=1157449, R2=1133504	29806	184	3986.43	99.06		N:R203K|N:G204R|ORF1a:R398C|ORF1b:P314L|S:S477N|S:D614G	20B	0.14.4	B.1.1	pangolin 3.1.3; PUSHER-v1.2.13
3	NORW-EC644_CoronaHiT-ONT	ERR4969032	195237	198-600	20.2784	1282.22	1476.43	1.15147	560	1339		29903	2111	257.025	92.94		N:R203K|N:G204R|ORF1a:R398C|ORF1b:P314L|S:D614G	20B	0.14.4	B.1.1	pangolin 3.1.3; PUSHER-v1.2.13
3	NORW-EC653_ARTIC_LoCost	ERR4969071	91353	401-693	19.8644	1148.77	438.986	0.382137	67	67		29903	122	433.048	99.59		ORF1a:K3162E|ORF1b:P314L|ORF3a:V13L|ORF7b:L11F|S:D614G	20A	0.14.4	B.1	pangolin 3.1.3; PUSHER-v1.2.13
3	NORW-EC653_CoronaHiT-Illumina	ERR4970095	457803	21-151	33.6233	3898.11	1752.68	0.449622	50	51	Uneven pairs: R1=457803, R2=447653	29798	16	1481.55	99.6		ORF1a:K3162E|ORF1b:P314L|ORF3a:V13L|ORF7b:L11F|S:D614G	20A	0.14.4	B.1	pangolin 3.1.3; PUSHER-v1.2.13
3	NORW-EC653_CoronaHiT-ONT	ERR4968990	157398	202-600	20.3835	1119.36	555.472	0.496241	83	262		29903	340	368.105	98.86		ORF1a:K3162E|ORF1b:P314L|ORF3a:V13L|ORF7b:L11F|S:D614G	20A	0.14.4	B.1	pangolin 3.1.3; PUSHER-v1.2.13
3	NORW-EC662_ARTIC_LoCost	ERR4969096	94694	400-700	19.3253	1195.58	434.064	0.363056	67	67		29903	121	436.099	99.6		N:S188L|ORF1b:T132I|ORF1b:P314L|ORF1b:F1955L|S:D614G	20A	0.14.4	B.1.93	pangolin 3.1.3; PANGO-v1.2.13
3	NORW-EC662_CoronaHiT-Illumina	ERR4970126	1346238	20-151	33.653	6866.77	1441.2	0.209881	16	26	Uneven pairs: R1=1346238, R2=1316970	29829	23	4494.83	99.68		N:S188L|ORF1b:T132I|ORF1b:P314L|ORF1b:F1955L|S:D614G	20A	0.14.4	B.1.93	pangolin 3.1.3; PANGO-v1.2.13
3	NORW-EC662_CoronaHiT-ONT	ERR4969027	188039	203-600	20.4978	1361.82	694.398	0.509903	83	86		29903	121	381.833	99.6		N:S188L|ORF1b:T132I|ORF1b:P314L|ORF1b:F1955L|S:D614G	20A	0.14.4	B.1.93	pangolin 3.1.3; PANGO-v1.2.13
3	NORW-EC671_ARTIC_LoCost	ERR4969117	95282	400-699	20.4831	1203.31	430.7	0.357929	66	67		29903	121	436.166	99.6		N:R203K|N:G204R|ORF1a:A3454V|ORF1b:P314L|ORF8:V62L|S:D614G	20B	0.14.4	B.1.1	pangolin 3.1.3; PANGO-v1.2.13
3	NORW-EC671_CoronaHiT-Illumina	ERR4970073	150324	22-151	33.7332	1355.32	883.686	0.65201	54	55	Uneven pairs: R1=150324, R2=147893	29832	50	515.129	99.6		N:R203K|N:G204R|ORF1a:A3454V|ORF1b:P314L|ORF8:V62L|S:D614G	20B	0.14.4	B.1.1	pangolin 3.1.3; PANGO-v1.2.13
3	NORW-EC671_CoronaHiT-ONT	ERR4968969	110484	205-600	20.2222	777.3	419.034	0.539088	86	276		29903	634	346.243	97.88		N:R203K|N:G204R|ORF1a:A3454V|ORF1b:P314L|ORF8:V62L|S:D614G	20B	0.14.4	B.1.1	pangolin 3.1.3; PUSHER-v1.2.13
3	NORW-EC680_ARTIC_LoCost	ERR4969128	95091	402-700	19.3244	1202.01	433.347	0.360519	67	67		29903	122	435.633	99.59		N:R203K|N:G204R|ORF1a:A3454V|ORF1b:P314L|ORF8:V62L|S:D614G	20B	0.14.4	B.1.1	pangolin 3.1.3; PUSHER-v1.2.13
3	NORW-EC680_CoronaHiT-Illumina	ERR4970090	526826	22-151	33.7338	4341.36	2018.33	0.464907	46	49	Uneven pairs: R1=526826, R2=517165	29855	57	1796.21	99.65		N:R203K|N:G204R|ORF1a:A3454V|ORF1b:P314L|ORF8:V62L|S:D614G	20B	0.14.4	B.1.1	pangolin 3.1.3; PUSHER-v1.2.13
3	NORW-EC680_CoronaHiT-ONT	ERR4968979	142772	203-600	20.5328	978.629	514.882	0.526126	99	290		29903	635	353.536	97.88		N:R203K|N:G204R|ORF1a:A3454V|ORF1b:P314L|ORF8:V62L|S:D614G	20B	0.14.4	B.1.1	pangolin 3.1.3; PUSHER-v1.2.13
3	NORW-EC69F_ARTIC_LoCost	ERR4969082	45136	401-700	18.847	564.829	413.895	0.73278	530	955		29903	1198	311.394	95.99		N:S188L|ORF1b:T132I|ORF1b:P314L|S:D614G	20A	0.14.4	B.1.93	pangolin 3.1.3; PUSHER-v1.2.13
3	NORW-EC69F_CoronaHiT-Illumina	ERR4970100	446202	23-151	33.731	3226.77	2577.82	0.798885	51	54	Uneven pairs: R1=446202, R2=438380	29806	122	1547.51	99.27		N:S188L|ORF1b:T132I|ORF1b:P314L|ORF1b:F1955L|S:D614G	20A	0.14.4	B.1.93	pangolin 3.1.3; PUSHER-v1.2.13
3	NORW-EC69F_CoronaHiT-ONT	ERR4968982	92874	198-600	20.8122	608.634	564.359	0.927256	1020	1961		29903	2738	226.856	90.84		N:S188L|ORF1b:T132I|ORF1b:P314L|S:D614G	20A	0.14.4	B.1.93	pangolin 3.1.3; PUSHER-v1.2.13
3	NORW-EC6AE_ARTIC_LoCost	ERR4969103	14337	404-700	19.3454	179.704	230.461	1.28245	4339	6158		29903	7188	133.746	75.96		N:R203K|N:G204R|ORF1a:A3454V|ORF1b:P314L|ORF8:V62L|S:D614G	20B	0.14.4	B.1.1	pangolin 3.1.3; PUSHER-v1.2.13
3	NORW-EC6AE_CoronaHiT-Illumina	ERR4970070	354299	22-151	33.625	2345.21	2516.1	1.07287	890	1377	Uneven pairs: R1=354299, R2=346970	29804	1996	1175.42	92.99		N:R203K|N:G204R|ORF1a:A3454V|ORF1b:P314L|ORF8:V62L|S:D614G	20B	0.14.4	B.1.1	pangolin 3.1.3; PUSHER-v1.2.13
3	NORW-EC6AE_CoronaHiT-ONT	ERR4968986	69123	196-599	20.703	432.84	564.61	1.30443	3686	4974		29903	7631	151.034	74.48		ORF1a:A3454V|ORF1b:P314L|ORF8:V62L|S:D614G	20B	0.14.4	B.1	pangolin 3.1.3; PUSHER-v1.2.13
3	NORW-EC6BD_ARTIC_LoCost	ERR4969112	93787	403-700	19.8539	1184.94	439.905	0.371247	62	226		29903	326	430.906	98.91		N:R203K|N:G204R|ORF1a:E2089D|ORF1a:A3333T|ORF1a:A3956T|ORF1b:P314L|ORF3a:D27H|S:T478I|S:D614G	20B	0.14.4	B.1.1.3	pangolin 3.1.3; PUSHER-v1.2.13
3	NORW-EC6BD_CoronaHiT-Illumina	ERR4970068	147401	22-151	33.652	1313.98	786.237	0.598362	26	70	Uneven pairs: R1=147401, R2=144718	29836	235	483.411	98.99		N:R203K|N:G204R|ORF1a:E2089D|ORF1a:A3333T|ORF1a:A3956T|ORF1b:P314L|ORF3a:D27H|S:T478I|S:D614G	20B	0.14.4	B.1.1.3	pangolin 3.1.3; PUSHER-v1.2.13
3	NORW-EC6BD_CoronaHiT-ONT	ERR4968989	152918	196-600	20.679	1076.15	565.489	0.525474	142	352		29903	544	366.567	98.18		N:R203K|N:G204R|ORF1a:E2089D|ORF1a:A3333T|ORF1a:A3956T|ORF1b:P314L|ORF3a:D27H|S:T478I|S:D614G	20B	0.14.4	B.1.1.3	pangolin 3.1.3; PUSHER-v1.2.13
3	NORW-EC6DB_ARTIC_LoCost	ERR4969102	71502	400-700	19.8296	896.255	441.104	0.492164	67	67		29903	121	400.373	99.6		ORF1a:S483Y|ORF1a:P892L|ORF1a:T3058I|ORF1b:P314L|S:D614G	20A	0.14.4	B.1.201	pangolin 3.1.3; PANGO-v1.2.13
3	NORW-EC6DB_CoronaHiT-Illumina	ERR4970088	444188	20-151	33.7141	3625.17	2226.62	0.614211	48	51	Uneven pairs: R1=444188, R2=436245	29798	0	1527.62	99.65		ORF1a:S483Y|ORF1a:P892L|ORF1a:T3058I|ORF1b:P314L|S:D614G	20A	0.14.4	B.1.201	pangolin 3.1.3; PANGO-v1.2.13
3	NORW-EC6DB_CoronaHiT-ONT	ERR4968997	176281	203-600	20.0243	1257.32	842.68	0.670217	83	293		29903	482	344.213	98.39		ORF1a:S483Y|ORF1a:P892L|ORF1a:T3058I|ORF1b:P314L|S:D614G	20A	0.14.4	B.1.201	pangolin 3.1.3; PUSHER-v1.2.13
3	NORW-EC6EA_ARTIC_LoCost	ERR4969067	70889	400-700	19.6057	889.775	453.69	0.509893	67	67		29903	121	389.151	99.6		N:R203K|N:G204R|ORF1b:P314L|S:S477N|S:D614G	20B	0.14.4	B.1.1	pangolin 3.1.3; PANGO-v1.2.13
3	NORW-EC6EA_CoronaHiT-Illumina	ERR4970094	472293	21-151	33.732	3741.81	2347.89	0.627476	48	51	Uneven pairs: R1=472293, R2=463935	29827	45	1632.38	99.6		N:R203K|N:G204R|ORF1b:P314L|S:S477N|S:D614G	20B	0.14.4	B.1.1	pangolin 3.1.3; PUSHER-v1.2.13
3	NORW-EC6EA_CoronaHiT-ONT	ERR4969035	218008	197-600	20.6686	1494.7	1060.51	0.709513	83	268		29903	612	341.867	97.95		N:R203K|N:G204R|ORF1b:P314L|S:D614G	20B	0.14.4	B.1.1	pangolin 3.1.3; PUSHER-v1.2.13
3	NORW-EC6F9_ARTIC_LoCost	ERR4969080	57813	400-699	19.2097	725.23	440.5	0.607394	67	337		29903	418	357.733	98.6		N:R203K|N:G204R|ORF1b:P314L|S:S477N|S:D614G	20B	0.14.4	B.1.1	pangolin 3.1.3; PANGO-v1.2.13
3	NORW-EC6F9_CoronaHiT-Illumina	ERR4970122	1296082	22-151	33.6685	5748.51	2464.44	0.42871	44	48	Uneven pairs: R1=1296082, R2=1269188	29821	23	4424.69	99.65		N:R203K|N:G204R|ORF1b:P314L|S:S477N|S:D614G	20B	0.14.4	B.1.1	pangolin 3.1.3; PANGO-v1.2.13
3	NORW-EC6F9_CoronaHiT-ONT	ERR4969029	168000	198-600	20.4808	1187.89	919.2	0.773808	135	591		29903	884	314.404	97.04		N:R203K|N:G204R|ORF1b:P314L|S:D614G	20B	0.14.4	B.1.1	pangolin 3.1.3; PUSHER-v1.2.13
3	NORW-EC705_ARTIC_LoCost	ERR4969081	10234	403-697	19.6381	127.738	162.977	1.27586	6157	7667		29903	9082	104.722	69.63		N:R203K|N:G204R|ORF1b:P314L|S:D614G|S:I670L	20B	0.14.4	B.1.1	pangolin 3.1.3; PUSHER-v1.2.13
3	NORW-EC705_CoronaHiT-Illumina	ERR4970130	1134766	22-151	33.6128	4266.16	3078.14	0.721526	850	1014	Uneven pairs: R1=1134766, R2=1115341	29808	1329	3910.5	95.23		N:R203K|N:G204R|ORF1a:E658K|ORF1b:P314L|ORF3a:G224C|S:D614G|S:I670L	20B	0.14.4	B.1.1	pangolin 3.1.3; PUSHER-v1.2.13
3	NORW-EC705_CoronaHiT-ONT	ERR4969020	143775	201-600	20.1819	990.167	1231.53	1.24376	1693	2308		29903	4005	230.942	86.61		N:R203K|N:G204R|ORF1b:P314L|ORF3a:G224C|S:D614G|S:I670L	20B	0.14.4	B.1.1	pangolin 3.1.3; PUSHER-v1.2.13
3	NORW-EC714_ARTIC_LoCost	ERR4969076	74840	400-700	19.419	941.007	470.959	0.500484	67	73		29903	122	393.951	99.59		N:S188L|ORF1b:T132I|ORF1b:P314L|ORF1b:F1955L|S:D614G	20A	0.14.4	B.1.93	pangolin 3.1.3; PUSHER-v1.2.13
3	NORW-EC714_CoronaHiT-Illumina	ERR4970069	347803	22-151	33.6096	2912.96	2083.44	0.715229	48	171	Uneven pairs: R1=347803, R2=341262	29806	285	1146.18	98.72		N:S188L|ORF1b:T132I|ORF1b:P314L|ORF1b:F1955L|S:D614G	20A	0.14.4	B.1.93	pangolin 3.1.3; PUSHER-v1.2.13
3	NORW-EC714_CoronaHiT-ONT	ERR4969026	151740	204-600	20.2655	1073.61	795.493	0.740954	349	716		29903	1147	318.032	96.16		N:S188L|ORF1b:T132I|ORF1b:P314L|ORF1b:F1955L|S:D614G	20A	0.14.4	B.1.93	pangolin 3.1.3; PUSHER-v1.2.13
3	NORW-EC732_ARTIC_LoCost	ERR4969075	93540	401-700	20.2142	1177.73	437.921	0.371835	67	67		29903	121	434.301	99.6		N:R203K|N:G204R|ORF1b:P314L|S:P9S|S:D614G	20B	0.14.4	B.1.1	pangolin 3.1.3; PANGO-v1.2.13
3	NORW-EC732_CoronaHiT-Illumina	ERR4970083	290197	22-151	33.6463	2542.88	1393.12	0.547854	50	52	Uneven pairs: R1=290197, R2=284896	29820	38	939.783	99.6		N:R203K|N:G204R|ORF1b:P314L|S:P9S|S:D614G	20B	0.14.4	B.1.1	pangolin 3.1.3; PUSHER-v1.2.13
3	NORW-EC732_CoronaHiT-ONT	ERR4969001	134242	191-600	19.8441	939.676	472.933	0.503294	94	270		29903	340	358.929	98.86		N:R203K|N:G204R|ORF1b:P314L|S:P9S|S:D614G	20B	0.14.4	B.1.1	pangolin 3.1.3; PUSHER-v1.2.13
3	NORW-EC741_ARTIC_LoCost	ERR4969101	17193	405-699	20.6775	215.811	254.87	1.18099	4094	6218		29903	7186	155.136	75.97		ORF1b:P314L|S:D614G	20A	0.14.4	A	pangolin 3.1.3; PUSHER-v1.2.13
3	NORW-EC741_CoronaHiT-Illumina	ERR4970128	1604001	21-151	33.6518	4851.38	3077.11	0.634276	760	883	Uneven pairs: R1=1604001, R2=1570052	29807	1220	5491.29	95.6		ORF1a:Q3729K|ORF1b:P314L|S:D614G	20A	0.14.4	A	pangolin 3.1.3; PUSHER-v1.2.13
3	NORW-EC741_CoronaHiT-ONT	ERR4969033	168348	197-600	20.4948	1126.22	1423.2	1.2637	2265	2670		29903	3886	240.032	87		ORF1b:P314L|S:D614G	20A	0.14.4	A	pangolin 3.1.3; PUSHER-v1.2.13
3	NORW-EC750_ARTIC_LoCost	ERR4969090	93006	400-699	20.1565	1172.66	440.205	0.375389	67	67		29903	121	433.705	99.6		N:R203K|N:G204R|ORF1a:A3454V|ORF1b:P314L|ORF8:V62L|S:D614G	20B	0.14.4	B.1.1	pangolin 3.1.3; PANGO-v1.2.13
3	NORW-EC750_CoronaHiT-Illumina	ERR4970072	155070	22-151	33.7134	1384.7	864.37	0.624231	52	87	Uneven pairs: R1=155070, R2=152637	29800	33	522.137	99.55		N:R203K|N:G204R|ORF1a:A3454V|ORF1b:P314L|ORF8:V62L|S:D614G	20B	0.14.4	B.1.1	pangolin 3.1.3; PUSHER-v1.2.13
3	NORW-EC750_CoronaHiT-ONT	ERR4968999	114284	197-600	20.9747	784.777	421.411	0.536982	86	271		29903	460	344.398	98.46		N:R203K|N:G204R|ORF1a:A3454V|ORF1b:P314L|ORF8:V62L|S:D614G	20B	0.14.4	B.1.1	pangolin 3.1.3; PUSHER-v1.2.13
3	NORW-EC76F_ARTIC_LoCost	ERR4969115	93286	401-700	19.1947	1174.77	436.956	0.37195	67	67		29903	121	433.867	99.6		N:S188L|ORF1b:T132I|ORF1b:P314L|ORF1b:F1955L|S:D614G	20A	0.14.4	B.1.93	pangolin 3.1.3; PANGO-v1.2.13
3	NORW-EC76F_CoronaHiT-Illumina	ERR4970091	458140	20-151	33.6813	3882.58	1889.06	0.486547	47	50	Uneven pairs: R1=458140, R2=449851	29820	22	1518.55	99.65		N:S188L|ORF1b:T132I|ORF1b:P314L|ORF1b:F1955L|S:D614G	20A	0.14.4	B.1.93	pangolin 3.1.3; PANGO-v1.2.13
3	NORW-EC76F_CoronaHiT-ONT	ERR4968975	133029	199-600	20.1841	924.728	475.917	0.514656	239	295		29903	634	353.064	97.88		N:S188L|ORF1b:T132I|ORF1b:P314L|S:D614G	20A	0.14.4	B.1.93	pangolin 3.1.3; PUSHER-v1.2.13
3	NORW-EC77E_ARTIC_LoCost	ERR4969070	86047	400-700	19.7318	1082.57	436.447	0.403159	67	67		29903	121	427.403	99.6		N:R203K|N:G204R|ORF1a:A3454V|ORF1b:P314L|ORF8:V62L|S:D614G	20B	0.14.4	B.1.1	pangolin 3.1.3; PANGO-v1.2.13
3	NORW-EC77E_CoronaHiT-Illumina	ERR4970076	166315	22-151	33.688	1481.8	933.979	0.630302	52	154	Uneven pairs: R1=166315, R2=163598	29818	150	550.397	99.21		N:R203K|N:G204R|ORF1a:A3454V|ORF1b:P314L|ORF8:V62L|S:D614G	20B	0.14.4	B.1.1	pangolin 3.1.3; PUSHER-v1.2.13
3	NORW-EC77E_CoronaHiT-ONT	ERR4968985	147548	200-600	19.9907	1017.82	543.901	0.53438	225	271		29903	339	358.63	98.87		N:R203K|N:G204R|ORF1a:A3454V|ORF1b:P314L|ORF8:V62L|S:D614G	20B	0.14.4	B.1.1	pangolin 3.1.3; PUSHER-v1.2.13
3	NORW-EC78D_ARTIC_LoCost	ERR4969110	15642	405-695	19.1746	194.69	211.913	1.08846	3402	4867		29903	5597	154.859	81.28		N:R203K|N:G204R|ORF1b:P314L|S:D614G	20B	0.14.4	B.1.1	pangolin 3.1.3; PUSHER-v1.2.13
3	NORW-EC78D_CoronaHiT-Illumina	ERR4970106	647356	21-151	33.52	3418.51	2865.49	0.838226	188	823	Uneven pairs: R1=647356, R2=636598	29799	860	2083.06	96.77		N:R203K|N:G204R|ORF1b:P314L|S:D614G	20B	0.14.4	B.1.1	pangolin 3.1.3; PUSHER-v1.2.13
3	NORW-EC78D_CoronaHiT-ONT	ERR4968972	111494	207-600	20.4726	702.81	847.459	1.20581	1789	2751		29903	4274	203.06	85.71		N:R203K|N:G204R|ORF1b:P314L|S:D614G	20B	0.14.4	B.1.1	pangolin 3.1.3; PUSHER-v1.2.13
3	NORW-EC7D8_ARTIC_LoCost	ERR4969100	12380	409-700	19.8701	154.646	205.031	1.32581	5586	7170		29885	8385	118.595	71.9	S:R1107-|S:N1108-|S:F1109-|S:Y1110-|S:E1111-|S:P1112-	ORF1b:P314L|ORF1b:Y506H|ORF1b:K1383R|S:D614G|S:Q1106P	20A	0.14.4	B.1	pangolin 3.1.3; PUSHER-v1.2.13
3	NORW-EC7D8_CoronaHiT-Illumina	ERR4969169	246461	22-151	33.6406	1798.06	2129.11	1.18411	1748	1981	Uneven pairs: R1=246461, R2=240743	29780	2675	816.599	90.63	S:R1107-|S:N1108-|S:F1109-|S:Y1110-|S:E1111-|S:P1112-	ORF1a:S3884L|ORF1b:P314L|ORF1b:Y506H|ORF1b:K1383R|S:D614G|S:Q1106P	20A	0.14.4	B.1	pangolin 3.1.3; PUSHER-v1.2.13
3	NORW-EC7D8_CoronaHiT-ONT	ERR4969019	90059	214-600	20.4168	659.764	954.569	1.44683	2854	4549		29885	6959	196.198	76.67	S:R1107-|S:N1108-|S:F1109-|S:Y1110-|S:E1111-|S:P1112-	ORF1a:S3884L|ORF1b:P314L|ORF1b:Y506H|ORF1b:K1383R|S:D614G|S:Q1106P	20A	0.14.4	B.1	pangolin 3.1.3; PUSHER-v1.2.13
3	NORW-EC7E7_ARTIC_LoCost	ERR4969085	93153	400-700	19.5456	1175.54	441.729	0.375765	67	67		29903	121	430.572	99.6		N:R203K|N:G204R|ORF1a:E452G|ORF1a:T1246I|ORF1a:M1378I|ORF1a:G3278S|ORF1b:P314L|S:D614G	20D	0.14.4	B.1.1.1	pangolin 3.1.3; PANGO-v1.2.13
3	NORW-EC7E7_CoronaHiT-Illumina	ERR4970077	439544	20-151	33.6616	3732.98	1774.45	0.475344	19	32	Uneven pairs: R1=439544, R2=431818	29832	16	1488.6	99.71		N:R203K|N:G204R|ORF1a:E452G|ORF1a:T1246I|ORF1a:M1378I|ORF1a:G3278S|ORF1b:P314L|S:D614G	20D	0.14.4	B.1.1.1	pangolin 3.1.3; PANGO-v1.2.13
3	NORW-EC7E7_CoronaHiT-ONT	ERR4969022	144316	196-600	20.0682	1043.1	566.099	0.542706	137	288		29903	359	368.259	98.8		N:R203K|N:G204R|ORF1a:E452G|ORF1a:T1246I|ORF1a:M1378I|ORF1a:G3278S|ORF1b:P314L|S:D614G	20D	0.14.4	B.1.1.1	pangolin 3.1.3; PUSHER-v1.2.13
3	NORW-EC7F6_ARTIC_LoCost	ERR4969109	93301	401-700	20.7778	1181.61	459.404	0.388795	494	494		29903	712	427.42	97.62		N:R203K|N:G204R|N:T271I|N:T325I|ORF1a:L4037F|ORF1b:P314L|ORF1b:P2116S|S:D614G	20B	0.14.4	B.1.1	pangolin 3.1.3; PUSHER-v1.2.13
3	NORW-EC7F6_CoronaHiT-Illumina	ERR4970092	449074	21-151	33.7147	3825.05	1880.93	0.491741	460	477	Uneven pairs: R1=449074, R2=441730	29799	444	1552.53	98.17		N:R203K|N:G204R|N:T271I|N:T325I|ORF1a:L4037F|ORF1b:P314L|ORF1b:P2116S|S:D614G	20B	0.14.4	B.1.1	pangolin 3.1.3; PANGO-v1.2.13
3	NORW-EC7F6_CoronaHiT-ONT	ERR4968958	112579	205-600	20.0988	767.997	434.33	0.565537	513	643		29903	1002	333.855	96.65		N:R203K|N:G204R|N:T271I|N:T325I|ORF1a:L4037F|ORF1b:P314L|ORF1b:P2116S|S:D614G	20B	0.14.4	B.1.1	pangolin 3.1.3; PUSHER-v1.2.13
3	NORW-EC802_ARTIC_LoCost	ERR4969066	66977	400-699	19.2983	841.264	460.97	0.547949	67	337		29903	416	376.281	98.61		ORF1a:K3162E|ORF1b:P314L|ORF3a:V13L|ORF7b:L11F|S:D614G	20A	0.14.4	B.1	pangolin 3.1.3; PUSHER-v1.2.13
3	NORW-EC802_CoronaHiT-Illumina	ERR4970107	638414	20-151	33.6313	4329.1	2632.83	0.60817	42	47	Uneven pairs: R1=638414, R2=624830	29821	68	2098.57	99.5		ORF1a:K3162E|ORF1b:P314L|ORF3a:V13L|ORF7b:L11F|S:D614G	20A	0.14.4	B.1	pangolin 3.1.3; PUSHER-v1.2.13
3	NORW-EC802_CoronaHiT-ONT	ERR4969000	117484	192-600	19.8668	795.709	616.149	0.774339	398	896		29903	1755	280.944	94.13		ORF1a:K3162E|ORF1b:P314L|ORF3a:V13L|S:D614G	20A	0.14.4	B.1	pangolin 3.1.3; PUSHER-v1.2.13
3	NORW-EC85D_ARTIC_LoCost	ERR4969065	41481	400-699	19.8732	517.824	338.124	0.652972	565	605		29902	714	325.721	97.61		N:P80S|N:H300Y|ORF1a:T350I|ORF1a:L3606X|ORF3a:G251V|ORF7a:Y20N	19A	0.14.4	B	pangolin 3.1.3; PUSHER-v1.2.13
3	NORW-EC85D_CoronaHiT-Illumina	ERR4970097	509951	22-151	33.6365	4055.66	2310.2	0.569623	38	49	Uneven pairs: R1=509951, R2=499080	29834	36	1697.05	99.65		N:P80S|N:H300Y|ORF1a:T350I|ORF1a:L3606F|ORF3a:G251V|ORF7a:Y20N	19A	0.14.4	B	pangolin 3.1.3; PANGO-v1.2.13
3	NORW-EC85D_CoronaHiT-ONT	ERR4968962	117982	199-600	20.3654	811.762	525.271	0.647076	397	1001		29902	1172	311.07	96.08		N:P80S|N:H300Y|ORF1a:T350I|ORF1a:L3606X|ORF3a:G251V|ORF7a:Y20N	19A	0.14.4	B	pangolin 3.1.3; PUSHER-v1.2.13
3	NORW-EC87B_ARTIC_LoCost	ERR4969086	86822	400-694	19.972	1092.8	439.638	0.402305	67	67		29903	121	427.35	99.6		N:R203K|N:G204R|ORF1a:A2701V|ORF1b:P314L|S:D614G	20B	0.14.4	B.1.1	pangolin 3.1.3; PANGO-v1.2.13
3	NORW-EC87B_CoronaHiT-Illumina	ERR4970064	211169	21-151	33.7084	1902.93	1172.86	0.616345	35	54	Uneven pairs: R1=211169, R2=208004	29831	83	721.858	99.48		N:R203K|N:G204R|ORF1a:A2701V|ORF1b:P314L|S:D614G	20B	0.14.4	B.1.1	pangolin 3.1.3; PUSHER-v1.2.13
3	NORW-EC87B_CoronaHiT-ONT	ERR4968980	128590	199-600	20.5259	869.189	474.996	0.546482	230	270		29903	634	345.269	97.88		N:R203K|N:G204R|ORF1a:A2701V|ORF1b:P314L|S:D614G	20B	0.14.4	B.1.1	pangolin 3.1.3; PUSHER-v1.2.13
3	NORW-EC899_ARTIC_LoCost	ERR4969087	94549	400-697	20.6284	1191.34	433.198	0.363623	67	67		29903	121	435.109	99.6		N:R203K|N:G204R|ORF1b:P314L|S:D614G	20B	0.14.4	B.1.1	pangolin 3.1.3; PANGO-v1.2.13
3	NORW-EC899_CoronaHiT-Illumina	ERR4970075	75528	22-151	33.7147	672.681	426.297	0.633727	54	275	Uneven pairs: R1=75528, R2=74417	29800	128	255.984	99.23		N:R203K|N:G204R|ORF1b:P314L|S:D614G	20B	0.14.4	B.1.1	pangolin 3.1.3; PUSHER-v1.2.13
3	NORW-EC899_CoronaHiT-ONT	ERR4968978	117075	203-600	20.4083	802.707	436.114	0.543305	87	266		29903	462	345.407	98.46		N:R203K|N:G204R|ORF1b:P314L|S:D614G	20B	0.14.4	B.1.1	pangolin 3.1.3; PUSHER-v1.2.13
3	NORW-EC8B7_ARTIC_LoCost	ERR4969104	93860	403-700	19.693	1185.54	435.278	0.367155	67	67		29903	122	436.174	99.59		N:R203K|N:G204R|ORF1b:P314L|S:L5F|S:D614G	20B	0.14.4	B.1.1	pangolin 3.1.3; PUSHER-v1.2.13
3	NORW-EC8B7_CoronaHiT-Illumina	ERR4970074	75122	22-151	33.6747	681.989	459.874	0.674313	56	229	Uneven pairs: R1=75122, R2=73828	29797	233	251.921	98.86		N:R203K|N:G204R|ORF1b:P314L|S:L5F|S:D614G	20B	0.14.4	B.1.1	pangolin 3.1.3; PUSHER-v1.2.13
3	NORW-EC8B7_CoronaHiT-ONT	ERR4969017	163129	196-600	20.715	1130.99	596.229	0.527176	83	86		29903	163	363.784	99.45		N:R203K|N:G204R|ORF1b:P314L|S:L5F|S:D614G	20B	0.14.4	B.1.1	pangolin 3.1.3; PUSHER-v1.2.13
3	NORW-EC8E4_ARTIC_LoCost	ERR4969111	96708	400-696	20.3259	1222.44	422.448	0.345578	48	66		29903	121	440.671	99.6		ORF1a:P2110S|ORF1a:T4217I|ORF1b:P314L|ORF1b:M454I|S:D614G	20A	0.14.4	B.1	pangolin 3.1.3; PANGO-v1.2.13
3	NORW-EC8E4_CoronaHiT-Illumina	ERR4970063	63752	22-151	33.6427	565.552	368.702	0.651932	88	89	Uneven pairs: R1=63752, R2=62631	29826	161	207.335	99.2		ORF1a:P2110S|ORF1a:T4217I|ORF1b:P314L|ORF1b:M454I|S:D614G	20A	0.14.4	B.1.225	pangolin 3.1.3; PUSHER-v1.2.13
3	NORW-EC8E4_CoronaHiT-ONT	ERR4969002	127104	198-600	20.4728	873.229	490.929	0.5622	71	86		29903	177	360.886	99.41		ORF1a:P2110S|ORF1a:T4217I|ORF1b:P314L|ORF1b:M454I|S:D614G	20A	0.14.4	B.1.225	pangolin 3.1.3; PUSHER-v1.2.13

## Sheet: Dataset4 (n=16)
			FASTQC			Samtools depth				Titan
Dataset	ID	SRA	Total Reads	Read length	Mean phred score	Mean Depth per nucleotide (MDN)	Standard deviation (for MDN)	Coefficient of variation (for MDN)	Number of nucleotides with depth <10	Number of paired end reads	Assembly Total length	Ambigous Ns	Assembly mean coverage	% mapped to the Wuhan reference	nextclade_aa_dels	nextclade_aa_subs	nextclade_clade	nextclade_version	pango_lineage	pangolin_version
4	hCoV-19_England_CAMC-13E7537_2021	ERR5556343	217320	40-221	36.1207	2318.91	2179.4	0.939835	71	Uneven pairs: R1=217320, R2=216830	29802	515	1714.52	97.94	ORF1a:S3675-|ORF1a:G3676-|ORF1a:F3677-	N:P80R|N:R203K|N:G204R|N:D348H|ORF1a:S1188L|ORF1a:K1795Q|ORF1a:D3526N|ORF1b:P314L|ORF1b:E1264D|ORF3a:S253P|ORF8:E92K|ORF9b:Q77E|S:L18F|S:T20N|S:P26S|S:D138Y|S:R190S|S:K417T|S:E484K|S:N501Y|S:D614G|S:H655Y|S:T1027I	20J (Gamma, V3)	0.14.4	P.1	pangolin 3.1.3; PUSHER-v1.2.13
4	hCoV-19_England_CAMC-14E726C_2021	ERR5743893	198715	20-221	35.9247	1920.59	1757.79	0.915236	307	Uneven pairs: R1=198715, R2=198332	29805	567	1167.1	97.78		M:I82S|N:M1X|N:R203M|N:D377Y|ORF1a:T1241I|ORF1a:T1567I|ORF1a:T3646A|ORF1b:P314L|ORF1b:G1129C|ORF1b:M1352I|ORF1b:M1581I|ORF1b:K2310R|ORF1b:S2312A|ORF3a:S26L|ORF7a:V82A|S:T95I|S:G142D|S:E154K|S:L452R|S:E484Q|S:D614G|S:P681R|S:Q1071H	21B (Kappa)	0.14.4	B.1.617.1	pangolin 3.1.3; PUSHER-v1.2.13
4	hCoV-19_England_CAMC-14E7A0A_2021	ERR5743043	1893395	51-221	36.1004	5472.85	2471.3	0.451556	60	Uneven pairs: R1=1893395, R2=1890185	29852	58	15954.5	99.64	ORF8:D119-|ORF8:F120-|S:F157-|S:R158-	M:I82T|N:M1X|N:D63G|N:R203M|N:G215C|N:D377Y|ORF1a:A1306S|ORF1a:P2046L|ORF1a:P2287S|ORF1a:V2930L|ORF1a:T3255I|ORF1a:T3646A|ORF1b:P314L|ORF1b:G662S|ORF1b:P1000L|ORF1b:A1918V|ORF3a:S26L|ORF7a:V82A|ORF7a:T120I|ORF7b:T40I|ORF9b:T60A|S:T19R|S:G142D|S:E156G|S:L452R|S:T478K|S:D614G|S:P681R|S:D950N	21A (Delta)	0.14.4	B.1.617.2	pangolin 3.1.3; PANGO-v1.2.13
4	hCoV-19_England_CAMC-1510779_2021	ERR5771988	1113379	40-221	35.9464	5212.52	2246.08	0.430901	267	Uneven pairs: R1=1113379, R2=1111258	29805	292	8814.18	98.7		M:I82S|N:M1X|N:R203M|N:D377Y|ORF1a:T1567I|ORF1a:T3646A|ORF1b:T17I|ORF1b:P314L|ORF1b:G1129C|ORF1b:M1352I|ORF1b:K2310R|ORF1b:S2312A|ORF3a:S26L|ORF7a:V82A|S:T95I|S:G142D|S:E154K|S:L452R|S:E484Q|S:D614G|S:P681R|S:Q1071H	21B (Kappa)	0.14.4	B.1.617.1	pangolin 3.1.3; PUSHER-v1.2.13
4	hCoV-19_England_QEUH-14A3615_2021	ERR5691945	1738634	31-221	35.925	5511.39	2265.97	0.411143	173	Uneven pairs: R1=1738634, R2=1735175	29844	234	14008.5	99.02	ORF1a:S3675-|ORF1a:G3676-|ORF1a:F3677-|S:A243-|S:L244-|S:H245-	E:P71L|N:T205I|ORF1a:T265I|ORF1a:K1655N|ORF1a:T2069I|ORF1a:K3353R|ORF1b:P314L|ORF1b:T1511I|ORF3a:Q57H|ORF3a:S171L|ORF8:I121L|S:D80A|S:D215G|S:L242H|S:K417N|S:E484K|S:N501Y|S:D614G|S:A701V	20H (Beta, V2)	0.14.4	B.1.351	pangolin 3.1.3; PUSHER-v1.2.13
4	hCoV-19_England_QEUH-E93AAC_2021	ERR5181310	915559	31-221	36.168	4809.27	2334.69	0.485456	100	Uneven pairs: R1=915559, R2=912627	29733	0	8331.92	99.43	N:D3-|ORF1a:S3675-|ORF1a:G3676-|ORF1a:F3677-|ORF6:F2-|S:H69-|S:V70-|S:Y144-	E:L21F|M:I82T|N:S2Y|N:A12G|N:T205I|ORF1a:T2007I|ORF1b:P314F|ORF1b:D1735N|ORF8:G8V|ORF9b:H9D|S:Q52R|S:A67V|S:E484K|S:D614G|S:Q677H|S:F888L	21D (Eta)	0.14.4	B.1.525	pangolin 3.1.3; PANGO-v1.2.13
4	hCoV-19_England_QEUH-E948CF_2021	ERR5181360	1507565	31-221	36.1246	5422.24	2168.94	0.400009	69	Uneven pairs: R1=1507565, R2=1500580	29792	33	13302	99.52	N:D3-|ORF1a:S3675-|ORF1a:G3676-|ORF1a:F3677-|ORF6:F2-|S:H69-|S:V70-|S:Y144-	E:L21F|M:I82T|N:S2Y|N:A12G|N:T205I|ORF1a:T2007I|ORF1b:P314F|ORF1b:D1735N|ORF8:G8V|ORF9b:H9D|S:Q52R|S:A67V|S:E484K|S:D614G|S:Q677H|S:F888L	21D (Eta)	0.14.4	B.1.525	pangolin 3.1.3; PANGO-v1.2.13
4	hCoV-19_England_RAND-14DD366_2021	ERR5749609	2326577	35-221	35.9343	5428.41	2633.42	0.485118	206	Uneven pairs: R1=2326577, R2=2323879	29857	51	19422.1	99.68	ORF8:D119-|ORF8:F120-|S:F157-|S:R158-	M:I82T|N:M1X|N:D63G|N:R203M|N:G215C|N:D377Y|ORF1a:A1306S|ORF1a:P2046L|ORF1a:P2287S|ORF1a:V2930L|ORF1a:T3255I|ORF1a:T3646A|ORF1b:P314L|ORF1b:G662S|ORF1b:P1000L|ORF1b:A1918V|ORF3a:S26L|ORF7a:V82A|ORF7a:T120I|ORF7b:T40I|ORF9b:T60A|S:T19R|S:G142D|S:E156G|S:L452R|S:T478K|S:D614G|S:P681R|S:D950N	21A (Delta)	0.14.4	B.1.617.2	pangolin 3.1.3; PANGO-v1.2.13
4	hCoV-19_USA_CA-QDX-2761_2020	SRR13422802	146635	35-251	36.9958	2339.29	1188.87	0.508216	142	146635	29806	104	1242.74	99.33		N:T205I|ORF1a:R77L|ORF1a:T265I|ORF1a:S3158T|ORF1b:P314L|ORF1b:P976L|ORF1b:D1183Y|ORF3a:Q57H|S:S13I|S:W152C|S:L452R|S:D614G	21C (Epsilon)	0.14.4	B.1.427	pangolin 3.1.3; PANGO-v1.2.13
4	hCoV-19_USA_CA-QDX-2781_2020	SRR13422799	76082	35-251	36.9859	1215.92	694.99	0.571576	166	76082	29824	265	608.593	98.85		N:T205I|ORF1a:T265I|ORF1a:A1473V|ORF1a:H2125Y|ORF1a:V3595G|ORF1a:F3789L|ORF1a:C3790F|ORF1a:I4205V|ORF1b:P314L|ORF1b:D1183Y|ORF1b:T2537I|ORF3a:Q57H|S:S13I|S:W152C|S:L452R|S:D614G	21C (Epsilon)	0.14.4	B.1.429	pangolin 3.1.3; PANGO-v1.2.13
4	hCoV-19_USA_MA-QDX-2966_2021	SRR13500958	73899	35-251	36.9812	1119.36	729.026	0.651287	66	73899	29833	26	802.692	99.68		N:A119S|N:R203K|N:G204R|N:M234I|ORF1a:L3468V|ORF1a:L3930F|ORF1b:P314L|ORF1b:T2432I|S:E484K|S:D614G|S:V1176F	20B	0.14.4	P.2	pangolin 3.1.3; PANGO-v1.2.13
4	hCoV-19_USA_NV-QDX-4024_2021	SRR13606410	92107	35-251	36.6432	1451.73	738.018	0.508371	67	92107	29824	18	972.978	99.68		N:A119S|N:R203K|N:G204R|N:M234I|ORF1a:L3468V|ORF1a:L3930F|ORF1a:T4249I|ORF1b:P314L|S:E484K|S:D614G|S:V1176F	20B	0.14.4	P.2	pangolin 3.1.3; PANGO-v1.2.13
4	hCoV-19_USA_RI-QDX-3232_2021	SRR13511054	102908	35-251	36.6463	1652.94	867.896	0.525063	76	102908	29824	28	1091.8	99.64	ORF1a:S3675-|ORF1a:G3676-|ORF1a:F3677-	N:M1X|N:P199L|N:M234I|ORF1a:T265I|ORF1a:L3201P|ORF1b:P314L|ORF1b:Q813H|ORF1b:Q1011H|ORF3a:P42L|ORF3a:Q57H|ORF8:T11I|S:L5F|S:T95I|S:D253G|S:E484K|S:D614G|S:A701V	21F (Iota)	0.14.4	B.1.526	pangolin 3.1.3; PUSHER-v1.2.13
4	hCoV-19_USA_TX-DSHS-2263_2021	SRR13603869	35473	35-251	36.9985	348.27	224.365	0.644227	882	35473	29782	1106	226.696	95.9		E:L73F|N:T205I|ORF1a:T265I|ORF1a:I2227T|ORF1a:S3158T|ORF1b:P314L|ORF1b:P976L|ORF1b:D1183Y|ORF1b:M1197I|ORF3a:Q57H|S:S13I|S:W152C|S:L452R|S:D614G|S:E1195G	21C (Epsilon)	0.14.4	B.1.427	pangolin 3.1.3; PUSHER-v1.2.13
4	hCoV-19_USA_TX-UTA-000313_2021	SRR14241199	222498	250	37.0724	2131.38	1762.01	0.8267	43	222498	29836	57	2324.94	99.59	ORF1a:S3675-|ORF1a:G3676-|ORF1a:F3677-	N:M1X|N:P199L|N:M234I|N:A419P|ORF1a:T265I|ORF1a:L3201P|ORF1b:K82R|ORF1b:P314L|ORF1b:Q1011H|ORF3a:P42L|ORF3a:Q57H|ORF8:T11I|S:L5F|S:T95I|S:D253G|S:E484K|S:D614G|S:A701V	21F (Iota)	0.14.4	B.1.526	pangolin 3.1.3; PUSHER-v1.2.13
4	hCoV-19_Wales_PHWC-4C8F5E_2021	ERR5405022	155158	20-149	33.6944	1411.38	1294.79	0.917394	254	Uneven pairs: R1=155158, R2=154566	29779	482	605.267	97.97	ORF1a:S3675-|ORF1a:G3676-|ORF1a:F3677-|S:H69-|S:V70-|S:Y144-	N:M1X|N:D3L|N:R203K|N:G204R|N:S235F|ORF1a:T1001I|ORF1a:A1708D|ORF1a:I2230T|ORF1a:F2780L|ORF1b:P314L|ORF1b:K1383R|ORF1b:E1977D|ORF3a:L15F|ORF8:Q27*|ORF8:R52I|ORF8:Y73C|S:N501Y|S:A570D|S:D614G|S:P681H|S:T716I|S:S982A|S:D1118H	20I (Alpha, V1)	0.14.4	B.1.1.7	pangolin 3.1.3; PUSHER-v1.2.13

## Sheet: Dataset5 (n=39)
			FASTQC			Samtools depth				Titan
Dataset	ID	SRA	Total Reads	Read length	Mean Phred Score	Mean Depth per nucleotide (MDN)	Standard deviation (for MDN)	Coefficient of variation (for MDN)	Number of nucleotides with depth <10	Paired end reads	Assembly Total length	Ambigous Ns	Assembly mean coverage	% mapped to the Wuhan reference	nextclade_aa_dels	nextclade_aa_subs	nextclade_clade	nextclade_version	pango_lineage	pangolin_version
5	hCoV-19_Australia_VIC11123_2020	SRR12751757	497470	35-151	33.9869	2779.45	2930.23	1.05425	2008	497470	29611	2929	2688.61	89.23		M:A142V|N:R203K|N:G204R|ORF1a:I300F|ORF1a:R718K|ORF1b:P314L|S:D614G|S:P812Q	20B	0.14.4	D.2	pangolin 3.1.3; PUSHER-v1.2.13
5	hCoV-19_Australia_VIC12012_2020	SRR13129709	568486	35-151	33.6483	4703.39	2147.04	0.456488	87	568486	29796	14	1882.88	99.6		N:R203K|N:G204R|ORF1a:I300F|ORF1a:K2511N|ORF1a:C3790F|ORF1a:A3889D|ORF1b:P314L|S:D614G	20B	0.14.4	D.3	pangolin 3.1.3; PANGO-v1.2.13
5	hCoV-19_Australia_VIC2020_2020	SRR12162365	258545	35-151	36.4419	2213.04	922.513	0.416854	88	258545	29806	43	1765.32	99.53		N:R203K|N:G204R|ORF1b:P314L|S:N501Y|S:D614G	20B	0.14.4	B.1.1	pangolin 3.1.3; PUSHER-v1.2.13
5	hCoV-19_Australia_VIC2653_2020	SRR12530461	584532	35-151	34.0784	4013.03	2780.36	0.692832	390	584532	29798	652	2895.12	97.47		N:R203K|N:G204R|ORF1a:T4207I|ORF1b:P314L|ORF1b:S1003G|ORF1b:L1203I|S:D614G	20B	0.14.4	B.1.1.431	pangolin 3.1.3; PUSHER-v1.2.13
5	hCoV-19_Australia_VIC357_2020	SRR11577968	436687	35-151	34.4364	4123.28	1923.48	0.466492	88	436687	29826	44	2697.92	99.6		ORF1a:T265I|ORF1b:P314L|ORF3a:Q57H|S:D614G	20C	0.14.4	B.1.320	pangolin 3.1.3; PANGO-v1.2.13
5	hCoV-19_Australia_VIC66_2020	SRR11494584	604651	35-151	33.6292	5200.73	2018.17	0.388055	85	604651	29821	39	2478.81	99.6		ORF1a:P271S|ORF1a:V378I|ORF1a:L3606F	19A	0.14.4	B.4.5	pangolin 3.1.3; PANGO-v1.2.13
5	hCoV-19_USA_AR-QDX-537_2020	SRR13001544	152965	35-251	36.6108	2401.34	1300.77	0.541684	67	152965	29867	61	1507.96	99.68		ORF1a:P892S|ORF1b:P314L|ORF1b:K2646N|S:D614G	20A	0.14.4	B.1.199	pangolin 3.1.3; PANGO-v1.2.13
5	hCoV-19_USA_CA-CZB-10010_2020	SRR13195337	2277602	146	32.8532	6293.29	2043.44	0.324701	51	2277602	29798	6	6888.53	99.63		N:T24I|N:S194P|ORF1a:T265I|ORF1a:Q575H|ORF1a:P892S|ORF1a:I1667V|ORF1a:S3884L|ORF1b:T239I|ORF1b:P314L|ORF1b:S997L|ORF3a:Q57H|S:D614G	20C	0.14.4	B.1.309	pangolin 3.1.3; PANGO-v1.2.13
5	hCoV-19_USA_CA-CZB-10245_2020	SRR13195265	1946500	146	33.0277	5314.91	2699.11	0.507838	59	1946500	29782	0	5541.43	99.6		N:R203K|N:G204R|ORF1b:P314L|ORF1b:M2667I|S:D614G	20B	0.14.4	B.1.1.205	pangolin 3.1.3; PUSHER-v1.2.13
5	hCoV-19_USA_CA-CZB-13120_2020	SRR13195052	416419	146	35.4063	3642.45	1641.21	0.45058	23	416419	29902	82	1977.84	99.72		N:R203K|N:G204R|ORF1b:P314L|S:D614G	20B	0.14.4	B.1.1.139	pangolin 3.1.3; PANGO-v1.2.13
5	hCoV-19_USA_CA-CZB-13702_2020	SRR13526755	1068040	146	34.5701	6365.61	1631.89	0.25636	47	1068040	29873	91	6691.73	99.6		N:R203K|N:G204R|ORF1a:A516V|ORF1a:N2603D|ORF1a:K3353R|ORF1b:P314L|ORF1b:D2576G|S:V83L|S:D614G|S:T732A|S:A879S	20B	0.14.4	B.1.1.418	pangolin 3.1.3; PUSHER-v1.2.13
5	hCoV-19_USA_CA-CZB-15265_2020	SRR13527262	209689	146	34.9129	1685.47	1960.42	1.16313	1531	209689	29899	2244	853.6	92.48		N:R203K|N:G204R|N:S250P|ORF1b:P314L|S:D614G	20B	0.14.4	B.1.1.391	pangolin 3.1.3; PUSHER-v1.2.13
5	hCoV-19_USA_CA-CZB-15587_2020	SRR13689874	301254	146	36.127	2827.2	1560.72	0.552038	89	301254	29902	255	2021.45	99.14		N:R203K|N:G204R|ORF1a:T551A|ORF1a:L730F|ORF1a:L3041F|ORF1a:G3334S|ORF1b:K258N|ORF1b:P314L|ORF1b:T1555I|ORF1b:S1881I|ORF1b:I2616V|S:D614G|S:T1009I|S:A1078S|S:V1228L|S:I1232F	20B	0.14.4	B.1.1.512	pangolin 3.1.3; PUSHER-v1.2.13
5	hCoV-19_USA_CA-CZB-16803_2020	SRR13690340	333889	146	36.2875	2965.94	1503.59	0.506953	8	333889	29903	36	2419.14	99.88		N:S194L|ORF1a:M1312I|ORF1a:C1847R|ORF1a:P1862S|ORF1a:T2007I|ORF1b:P314L|ORF8:V32L|ORF9b:P3L|S:D614G|S:V1104L	20A	0.14.4	B.1.232	pangolin 3.1.3; PUSHER-v1.2.13
5	hCoV-19_USA_CA-CZB-19306_2020	SRR13690003	753605	146	36.2578	5463.01	2068.52	0.378642	47	753605	29893	64	5125.91	99.73		N:P67S|N:P199L|ORF1a:T265I|ORF1a:V410M|ORF1a:T814I|ORF1a:T1589I|ORF1b:P314L|ORF1b:E1276G|ORF1b:K1390R|ORF1b:N1653D|ORF3a:Q57H|ORF3a:G172V|ORF8:S24L|S:D614G	20G	0.14.4	B.1.2	pangolin 3.1.3; PUSHER-v1.2.13
5	hCoV-19_USA_CA-CZB-2190_2020	SRR12661075	3399069	146	36.523	7617.06	865.937	0.113684	32	3399069	29903	68	24396.6	99.77		ORF1a:T265I|ORF1a:H1113Y|ORF1b:P314L|ORF1b:L1099F|ORF3a:Q57H|S:D614G	20C	0.14.4	B.1.452	pangolin 3.1.3; PANGO-v1.2.13
5	hCoV-19_USA_CA-CZB-3273_2020	SRR12763543	1236202	146	36.2599	5332.49	2916.27	0.546888	790	1236202	29895	1177	2688.61	96.04		N:R203K|N:G204R|ORF1b:P314L|S:D614G	20B	0.14.4	B.1.1.463	pangolin 3.1.3; PUSHER-v1.2.13
5	hCoV-19_USA_CA-CZB-6122_2020	SRR12833927	1287220	146	36.2148	5405.73	2690.37	0.497688	343	1287220	29561	34	8865.35	98.74		N:R203K|N:G204R|ORF1a:G3334S|ORF1b:P314L|S:D614G	20B	0.14.4	B.1.1.514	pangolin 3.1.3; PUSHER-v1.2.13
5	hCoV-19_USA_CA-CZB-6993_2020	SRR12833718	651160	146	36.0652	3617.05	2809.12	0.776633	1081	651160	29561	1119	4196.77	95.09		N:R203K|N:G204R|ORF1a:V60I|ORF1a:S2193F|ORF1a:H3152Y|ORF1b:P314L|ORF1b:E1085K|ORF9b:R32L|S:L18F|S:S494P|S:D614G	20B	0.14.4	B.1.1.174	pangolin 3.1.3; PUSHER-v1.2.13
5	hCoV-19_USA_CA-QDX-110_2020	SRR12192434	22164	149	33.3231	190.924	64.1515	0.336005	21	22164	29856	13	74.03	99.8		ORF1a:T265I|ORF1b:P314L|ORF3a:Q57H|ORF8:S24L|S:D614G	20C	0.14.4	B.1.336	pangolin 3.1.3; PANGO-v1.2.13
5	hCoV-19_USA_CA-QDX-1984_2020	SRR13193342	78530	35-251	37.0194	1234.38	1062.23	0.860542	67	78530	29836	30	917.591	99.68		ORF1a:T265I|ORF1b:P314L|ORF1b:R2613N|ORF3a:Q57H|S:D614G|S:E702Q	20C	0.14.4	B.1.578	pangolin 3.1.3; PANGO-v1.2.13
5	hCoV-19_USA_CO-CDPHE-2004220748_2020	SRR13373851	184210	35-251	36.5343	1706.85	796.502	0.46665	54	184210	29798	16	1175.11	99.6		N:A152S|ORF1a:T265I|ORF1b:P314L|ORF3a:Q57H|S:D614G	20C	0.14.4	B.1.492	pangolin 3.1.3; PANGO-v1.2.13
5	hCoV-19_USA_CO-CDPHE-2007251462_2020	SRR13668148	200629	35-251	31.7737	1591.25	1731.68	1.08825	1031	200629	29894	1220	1221.18	95.89		ORF1a:T265I|ORF1a:I2501T|ORF1a:E3608K|ORF1a:A4396V|ORF1b:P314L|ORF1b:A2565V|ORF3a:K21N|ORF3a:Q57H|S:D614G|S:P681L	20C	0.14.4	B.1.570	pangolin 3.1.3; PUSHER-v1.2.13
5	hCoV-19_USA_CT-QDX-2695_2020	SRR13297857	51105	35-251	37.1314	422.025	283.334	0.671368	34	51105	29806	0	341.572	99.68		ORF1a:T265I|ORF1b:P314L|ORF1b:K1447N|ORF3a:Q57H|S:D614G	20C	0.14.4	B.1.450	pangolin 3.1.3; PANGO-v1.2.13
5	hCoV-19_USA_MA-MGH-01206_2020	SRR12733606	776002	101	34.8381	707.664	408.596	0.577387	8	776002	29897	67	440.999	99.75		N:R209I|ORF1b:P314L|S:D614G	20A	0.14.4	B.1.390	pangolin 3.1.3; PUSHER-v1.2.13
5	hCoV-19_USA_MA-MGH-02728_2020	SRR13574337	1245538	101	34.4474	1750.68	964.001	0.550644	13	1245538	29897	34	929.993	99.87	S:H69-|S:V70-	M:I48V|N:T205I|ORF1a:T265I|ORF1a:T1828A|ORF1b:P314L|ORF1b:E1264D|ORF3a:Q57H|ORF3a:T151I|S:D614G	20C	0.14.4	B.1.375	pangolin 3.1.3; PANGO-v1.2.13
5	hCoV-19_USA_MA-MGH-03162_2020	SRR13486908	3297513	101	35.2673	6988.77	1586.85	0.227057	0	3297513	29903	0	8408.9	100		N:S193I|ORF1a:G345S|ORF1a:T2087I|ORF1b:A241V|ORF1b:P314L|ORF3a:G18V|ORF3a:Q57H|S:Y145H|S:D614G	20A	0.14.4	B.1.385	pangolin 3.1.3; PANGO-v1.2.13
5	hCoV-19_USA_MN-QDX-1320_2020	SRR13089080	37630	35-251	36.9893	438.254	240.022	0.547678	67	37630	29824	18	335.671	99.68		ORF1a:T265I|ORF1a:L3352F|ORF1a:L4037F|ORF1b:P314L|ORF3a:Q57H|ORF8:S24L|S:D614G	20C	0.14.4	B.1.589	pangolin 3.1.3; PANGO-v1.2.13
5	hCoV-19_USA_MN-QDX-981_2020	SRR13062553	20718	35-251	37.1034	327.356	180.107	0.550187	67	20718	29806	0	256.059	99.68		N:S187L|ORF1a:T265I|ORF1b:P314L|ORF3a:Q57H|ORF8:S24L|S:D614G	20C	0.14.4	B.1.265	pangolin 3.1.3; PANGO-v1.2.13
5	hCoV-19_USA_MO-QDX-675_2020	SRR13004400	34961	35-251	37.3234	539.95	345.601	0.640062	67	34961	29835	50	450.196	99.61		ORF1a:T265I|ORF1a:S3885F|ORF1b:P314L|ORF3a:Q57H|S:D614G	20C	0.14.4	B.1.264	pangolin 3.1.3; PUSHER-v1.2.13
5	hCoV-19_USA_NY-QDX-2732_2020	SRR13297853	372300	35-251	37.2278	4435.24	2277.55	0.513512	32	372300	29844	38	4181.58	99.68		ORF1a:T265I|ORF1b:P314L|ORF3a:Q57H|S:D614G	20C	0.14.4	B.1.323	pangolin 3.1.3; PANGO-v1.2.13
5	hCoV-19_USA_TX-DSHS-0577_2020	SRR12774785	29696	35-251	36.7481	277.366	156.216	0.563212	850	29696	29891	1072	174.376	96.37		ORF1a:T265I|ORF1b:P314L|ORF1b:S2363F|ORF3a:Q57H|S:D614G	20C	0.14.4	B.1.287	pangolin 3.1.3; PUSHER-v1.2.13
5	hCoV-19_USA_TX-DSHS-1374_2020	SRR13126740	33706	35-251	36.9319	322.165	250.33	0.777025	1993	33706	29782	2864	175.482	90.02		ORF1a:Q663R|ORF1b:P314L|S:D614G	20A	0.14.4	B.1.384	pangolin 3.1.3; PUSHER-v1.2.13
5	hCoV-19_USA_TX-DSHS-1979_2020	SRR13358209	35450	35-251	36.8253	333.631	213.906	0.641146	175	35450	29782	527	208.637	97.83		N:R203K|N:G204R|N:A359S|ORF1b:P314L|S:D614G	20B	0.14.4	B.1.1.440	pangolin 3.1.3; PUSHER-v1.2.13
5	hCoV-19_USA_TX-DSHS-2474_2020	SRR13687078	33826	35-251	36.8054	324.196	160.449	0.494914	389	33826	29829	425	219.356	98.33		N:R203K|N:G204R|ORF1a:N704H|ORF1b:P314L|S:S98F|S:D614G	20B	0.14.4	B.1.1.362	pangolin 3.1.3; PANGO-v1.2.13
5	hCoV-19_USA_UT-02577_2020	SRR12212912	274115	35-151	36.9225	2590.34	1574.15	0.607701	290	274115	29837	319	1963.43	98.71		ORF1a:S2083R|ORF1b:P314L|ORF3a:Q57H|ORF7a:T28I|S:D614G	20A	0.14.4	B.1.112	pangolin 3.1.3; PUSHER-v1.2.13
5	hCoV-19_USA_UT-UPHL-201022808_2020	SRR12901576	363267	35-151	36.2315	3301.84	2083.32	0.630957	297	363267	29900	411	2041.9	98.62		ORF1a:T265I|ORF1b:P314L|ORF3a:Q57H|S:D614G|S:S698L	20C	0.14.4	B.1.515	pangolin 3.1.3; PUSHER-v1.2.13
5	hCoV-19_USA_UT-UPHL-2101361183_2020	SRR13433883	106223	35-151	36.6158	996.546	640.76	0.642981	524	106223	29818	831	482.279	96.94	S:H69-|S:V70-	N:P67S|N:T334I|ORF1a:R73C|ORF1a:I2501T|ORF1a:M4241I|ORF1b:P314L|ORF1b:V711I|ORF1b:P976L|ORF1b:H1213Y|ORF1b:A1521S|ORF3a:Q185H|ORF8:L60F|S:L189F|S:N439K|S:D614G|S:V772I	20A	0.14.4	B.1.258.23	pangolin 3.1.3; PUSHER-v1.2.13
5	SARS-CoV-2_human_AUS_TL26_2020	SRR11915959	553601	35-151	33.683	4753.13	2167.14	0.455939	293	553601	29782	493	2144.88	97.93		N:T205I|ORF1a:N2405S|ORF1a:L3606F|ORF1b:T17I|ORF3a:G251V	19A	0.14.4	B.35	pangolin 3.1.3; PUSHER-v1.2.13

## Sheet: Dataset6 (n=24)
			FASTQC			Samtools depth				Titan
Dataset	ID	SRA	Total Reads	Read length	Mean phred score	Mean Depth per nucleotide (MDN)	Standard deviation (for MDN)	Coefficient of variation (for MDN)	Number of nucleotides with depth <10	Paired end reads	Assembly Total length	Ambigous Ns	Assembly mean coverage	% mapped to the Wuhan reference	VADR alert =0 (version 2)	Category	nextclade_clade	nextclade_version	pango_lineage	pangolin_version
6	benchmark_bad1	SRR16298175	176132	35-151	36.5982	189.982	493.334	2.59674	19682	176132	29506	20018	129.533	31.73	no, VADR skip due to poor assembly	Failed sample, high host contamination (83.8%)	20A	0.14.4	None	pangolin 3.1.3; PANGO-v1.2.13
6	benchmark_bad2	SRR16298174	206885	35-151	36.4114	0.477076	1.89197	3.96577	29870	206885	28352	28352	0.19075	0	no, VADR skip due to poor assembly	Failed sample, low coverage		0.14.4	None	pangolin 3.1.3; PANGO-v1.2.13
6	benchmark_bad3	SRR16298164	54716	35-151	35.7834	0.168277	2.67092	15.8721	29870	54716	26380	26380	0.0305655	0	no, VADR skip due to poor assembly	Failed sample, high host contamination (98.07%)		0.14.4	None	pangolin 3.1.3; PANGO-v1.2.13
6	benchmark_bad4	SRR16298163	162	35-151	37.0448	1.07086	1.63886	1.53041	29802	162	29699	29699	0.850015	0	no, VADR skip due to poor assembly	Failed sample, low coverage		0.14.4	None	pangolin 3.1.3; PANGO-v1.2.13
6	benchmark_bad5	SRR16298162	15754	35-151	34.9231	17.82	11.5116	0.645991	6797	15754	29782	14252	11.4409	51.91	Yes	Failed sample, low coverage	20A	0.14.4	B	pangolin 3.1.3; PUSHER-v1.2.13
6	benchmark_bad6	SRR16298161	199534	35-151	36.7289	839.971	1728.4	2.05769	11914	199534	29069	11787	661.171	57.79	no	Failed, sample low breath of coverage	20C	0.14.4	B	pangolin 3.1.3; PUSHER-v1.2.13
6	benchmark_bad7	SRR16298160	14350	35-151	36.5898	117.246	162.036	1.38202	5254	14350	29707	6813	85.131	76.56	Yes	Failed sample, ambigous Ns>3000	20A	0.14.4	B.1.243	pangolin 3.1.3; PUSHER-v1.2.13
6	benchmark_bad8	SRR16298159	35648	35-151	36.3359	0.313681	1.36384	4.34786	29870	35648	28919	28919	0.169916	0	no, VADR skip due to poor assembly	Failed sample, high host contamination (87.8%)		0.14.4	None	pangolin 3.1.3; PANGO-v1.2.13
6	benchmark_bad9	SRR16298158	361439	35-151	36.7225	462.463	1504.03	3.25223	22964	361439	29459	22686	615.558	22.65	VADR skip due to poor assembly	Failed sample, high host contamination (66.2%)	20E (EU1)	0.14.4	None	pangolin 3.1.3; PANGO-v1.2.13
6	benchmark_bad11	SRR16298173	138437	35-151	36.9968	1077.2	783.971	0.727783	3073	138437	29838	3223	861.55	89	Yes	Failed sample, ambigous Ns> 3000	19A	0.14.4	B	pangolin 3.1.3; PANGO-v1.2.13
6	benchmark_bad12	SRR16298172	2604	35-151	36.4928	22.2582	20.3165	0.912765	4668	2604	29838	9620	16.3418	67.61	no	Failed sampke, low coverage (16)	19A	0.14.4	B	pangolin 3.1.3; PANGO-v1.2.13
6	benchmark_bad13	SRR16298171	356664	35-151	36.8699	2524.43	2239.65	0.88719	2829	356664	29812	2856	1870.23	90.14	no	Failed sample, VADR alert>1	20C	0.14.4	B.1	pangolin 3.1.3; PUSHER-v1.2.13
6	benchmark_bad14	SRR16298170	606703	35-151	36.8369	3760.69	2892.88	0.769243	4049	606703	29812	4292	3326.58	85.34	Yes	Failed positive control, amplicon Dropout and ambigous Ns>3000	19B	0.14.4	A	pangolin 3.1.3; PUSHER-v1.2.13
6	benchmark_bad15	SRR16298169	223641	35-151	36.3314	1387.39	2131.94	1.53665	4317	223641	29726	4751	1167.58	83.52	Yes	Failed positive control, Number of nucleotides with depth below 10 > 10% of reference length	19B	0.14.4	A	pangolin 3.1.3; PUSHER-v1.2.13
6	benchmark_bad16	SRR16298168	334197	35-251	36.8089	2919.12	1952.06	0.668715	379	334197	29798	352	2320.73	98.47	Yes	Failed positive control, > 100 Ns in a stretch	19B	0.14.4	A	pangolin 3.1.3; PUSHER-v1.2.13
6	benchmark_bad17	SRR16298167	1330	35-251	25.0595	0.0571849	0.333322	5.82884	29903	1330	363	363	0.0162525	0	no, VADR skip due to poor assembly	Failed negative control (nonitemplate control), contamination		0.14.4	None	pangolin 3.1.3; PANGO-v1.2.13
6	benchmark_bad19	SRR16298165	533855	35-151	36.5975	2011.69	3140.55	1.56115	18634	533855	26371	15173	2972.09	37.44	Yes	Failed negative control (water), contamination	20B	0.14.4	None	pangolin 3.1.3; PANGO-v1.2.13
6	benchmark_bad10	SRR16298157	1691	35-151	27.3022	0.00722336	0.119979	16.6099	29903	2						Failed sample, low phred score leading to insufficient paired reads		0.14.4	None	pangolin 3.1.3; PANGO-v1.2.13
6	benchmark_bad18	SRR16298166	6344	35-251	22.822	0.154299	0.682635	4.42411	29874	5						Failed negative control (non-template control), low phred score leading to insufficient paired reads		0.14.4	None	pangolin 3.1.3; PANGO-v1.2.13
6	benchmark_bad20	SRR12899254	281620	35-151	36.2446	2347.53	2369.18	1.00922	1826	281620	29850	2260	1453.64	92.26	21	Failed sample, frameshift leading to VADR failure
6	benchmark_bad21	SRR12973280	136863	35-151	36.1592	1160.4	1736.07	1.4961	3724	136863	29864	6735	398.545	77.34	20	Failed sample, frameshift leading to VADR failure
6	benchmark_bad22	SRR13490700	234411	35-151	33.8478	1702.01	2128.5	1.25058	3937	234411	29847	5155	940.548	82.57	24	Failed sample, frameshift leading to VADR failure
6	benchmark_bad23	SRR13499308	121778	35-151	35.8498	1146.59	827.38	0.721598	992	121778	29886	2168	322.654	92.68	3	Failed sample, frameshift leading to VADR failure
6	benchmark_bad24	SRR13645688	101243	35-151	30.5391	747.253	1218.46	1.63059	4595	101243	29850	5687	600.369	80.8	4	Failed sample, frameshift leading to VADR failure
